# Supplementary material for: Dose-Ranging Effect of Adjunctive Oral Cannabidiol vs Placebo on Convulsive Seizure Frequency in Dravet Syndrome: A Randomized Clinical Trial
Source: PubMed Central journal article supplement — JAMA Neurol. 2020 Mar 2;77(5):1–10. doi: 10.1001/jamaneurol.2020.0073 (PMC7052786; doi:10.1001/jamaneurol.2020.0073), 2020-03-02
Supplement: jamaneurol-77-613-s001.pdf [file jamaneurol-77-613-s001.pdf]

1  
2  
3

4 **Effect of Adjunctive Oral Cannabidiol (CBD) vs. Placebo on Convulsive**  
5 **Seizure Frequency in Dravet Syndrome**  
6 **Supplement 1**

7 Table of Contents ..... 1  
8 Original Trial Protocol ..... 2  
9 Amendments to the Original Protocol..... 105  
10 Original (Final) Statistical Analysis Plan..... 110

11  
12  
13  
14  
15  
16  
17  
18  
19  
20  
21  
22  
23  
24  
25  
26  
27  
28  
29  
30  
31  
32  
33  
34  
35  
36  
37  
38  
39  
40  
41  
42  
43  
44  
45  
46  
47  
48

**TITLE: A randomized, double-blind, placebo-controlled study to investigate the efficacy and safety of cannabidiol (GWP42003-P) in children and young adults with Dravet syndrome.**

**STUDY CODE: GWEP1424**

**EudraCT NUMBER: 2014-002939-34**

**GW RESEARCH LTD**

**PORTON DOWN SCIENCE PARK**

**SALISBURY**

**WILTSHIRE SP4 0JQ**

**TEL: PPD FAX: PPD**

**Confidentiality Statement**

This document contains confidential information of GW Research Ltd that must not be disclosed to anyone other than the recipient study staff and members of the Institutional Review Board/Ethics Committee. This information cannot be used for any purpose other than the evaluation or conduct of the clinical investigation without the prior written consent of GW Research Ltd.

54

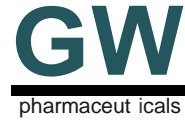

Study Code: GWEP1424  
EudraCT Number: 2014-002939-34  
Version 1 Date 22 Jul 14

61  
62

55  
56  
57  
58  
59  
60  
61  
62  
63  
64  
65  
66  
67  
68  
69  
70  
71  
72  
73  
74  
75  
76  
77  
78  
79  
80  
81  
82  
83  
84  
85  
86  
87  
88  
89  
90  
91  
92  
93  
94  
95  
96  
97  
98  
99  
100  
101  
102  
103  
104  
105  
106  
107  
108  
109  
110  
111  
112  
113

**Investigator Agreement**

I have read the attached protocol entitled "A randomized, double-blind, placebo-controlled study to investigate the efficacy and safety of cannabidiol (GWP42003-P) in children and young adults with Dravet syndrome", dated 22 Jul 14 and agree to abide by all provisions set forth therein.

I agree to comply with applicable regulatory requirement(s); the FDA regulations relating to good clinical practice and clinical trials and the European Union (EU) Clinical Trials Directive (2001/20/EC) and subsequent applicable regulatory/statutory instruments, or the International Conference on Harmonization Tripartite Guideline on Good Clinical Practice (ICH GCP) where the EU Directive does not apply and to complete a Form 1572 if required.

I am not aware that any conflicts of interest, financial or otherwise, exist for myself, my spouse [or legal partner] and dependent children and agree to confirm this in writing if required and update as necessary.

I agree to ensure that the confidential information contained in this document will not be used for any purpose other than the evaluation or conduct of the clinical investigation without the prior written consent of GW Research Ltd.

Center No: \_\_\_\_\_

Print Name: \_\_\_\_\_

Date: \_\_\_\_\_

Principal Investigator

(DD Month YYYY)

Signature: \_\_\_\_\_

GW Authorization 103

Print Name: **PPD** 104

Date: *05/16/14*

Clinical Manage 107

(DD Month YYYY)

Signature: \_\_\_\_\_

114  
115  
116  
117  
118  
119  
  
120  
121

## 1 PROTOCOL SYNOPSIS

|                        |                                                                                                                                                                                                                                                                                                                                                                                                                                                                                                                                                                                                                                                                                                                                                                                                                                                                                                                                                                                                                                                                                                                                                                                                 |
|------------------------|-------------------------------------------------------------------------------------------------------------------------------------------------------------------------------------------------------------------------------------------------------------------------------------------------------------------------------------------------------------------------------------------------------------------------------------------------------------------------------------------------------------------------------------------------------------------------------------------------------------------------------------------------------------------------------------------------------------------------------------------------------------------------------------------------------------------------------------------------------------------------------------------------------------------------------------------------------------------------------------------------------------------------------------------------------------------------------------------------------------------------------------------------------------------------------------------------|
| Study Title            | A randomized, double-blind, placebo-controlled study to investigate the efficacy and safety of cannabidiol (GWP42003-P) in children and young adults with Dravet syndrome.                                                                                                                                                                                                                                                                                                                                                                                                                                                                                                                                                                                                                                                                                                                                                                                                                                                                                                                                                                                                                      |
| Clinical Study Type    | Phase Three Study                                                                                                                                                                                                                                                                                                                                                                                                                                                                                                                                                                                                                                                                                                                                                                                                                                                                                                                                                                                                                                                                                                                                                                               |
| Indication             | Dravet syndrome (DS)                                                                                                                                                                                                                                                                                                                                                                                                                                                                                                                                                                                                                                                                                                                                                                                                                                                                                                                                                                                                                                                                                                                                                                            |
| Primary Objective      | To assess the efficacy of GWP42003-P as an adjunctive antiepileptic treatment compared with placebo, with respect to the percentage change from baseline during the maintenance period of the study in convulsive seizure frequency. The dose response effect between two GWP42003-P Dose Levels and placebo will also be explored. Convulsive seizures are defined as tonic-clonic, tonic, clonic or atonic and non-convulsive seizures as myoclonic, partial or absence.                                                                                                                                                                                                                                                                                                                                                                                                                                                                                                                                                                                                                                                                                                                      |
| Secondary Objective(s) | <ul style="list-style-type: none"> <li>• To assess changes from baseline in non-convulsive seizure frequency, usage of rescue medication, number of inpatient hospitalizations due to epilepsy, sleep disruption, daytime sleepiness, quality of life and conduct behavioral and cognitive assessments in patients taking GWP42003-P as an adjunctive treatment, when compared with placebo.</li> <li>• To assess the safety of both GWP42003-P doses when compared with placebo.</li> </ul>                                                                                                                                                                                                                                                                                                                                                                                                                                                                                                                                                                                                                                                                                                    |
| Study Design           | <p>This study is a 1:1:1 randomized, double-blind, 14-week comparison of two Dose Levels of GWP42003-P versus placebo. The treatment period will consist of a two-week titration period followed by a 12-week maintenance period. The treatment period will be followed by a 10-day taper period and a four-week follow-up period. The study will aim to determine the efficacy, safety and tolerability of two Dose Levels of GWP42003-P compared with placebo. The High Dose Level will be as recommended by the Data Safety Monitoring Committee (DSMC) after assessment of safety and pharmacokinetic data from Part A of study GWEP1332. The Low Dose Level will be defined as 50% of the High Dose Level. Patients in the placebo group will be split into two equivalent cohorts: half receiving Low Dose Level dosing volumes and half receiving High Dose Level dosing volumes. The first patient will not enroll into this study until the DSMC has reviewed the safety data from Part A of study GWEP1332.</p> <p>Following study completion, all patients will be invited to continue to receive GWP42003-P in an open label extension (OLE) study (under a separate protocol).</p> |
| Primary Endpoint       | The primary endpoint is the mean percentage change from baseline in convulsive seizure frequency during the maintenance period (Day 15 to the end of the evaluable period) in patients taking GWP42003-P                                                                                                                                                                                                                                                                                                                                                                                                                                                                                                                                                                                                                                                                                                                                                                                                                                                                                                                                                                                        |

122  
123  
124  
125  
126  
127  
128

|                       |                                                                                                                                                                                                                                                                                                                                                                                                                                                                                                                                                                                                                                                                                                                                                                                                                                                                                                                                                                                                                                                                                                                                                                                                                                                                                                                                                                                                                                                                                                                                                                                                                                                                                                                                                                                      |
|-----------------------|--------------------------------------------------------------------------------------------------------------------------------------------------------------------------------------------------------------------------------------------------------------------------------------------------------------------------------------------------------------------------------------------------------------------------------------------------------------------------------------------------------------------------------------------------------------------------------------------------------------------------------------------------------------------------------------------------------------------------------------------------------------------------------------------------------------------------------------------------------------------------------------------------------------------------------------------------------------------------------------------------------------------------------------------------------------------------------------------------------------------------------------------------------------------------------------------------------------------------------------------------------------------------------------------------------------------------------------------------------------------------------------------------------------------------------------------------------------------------------------------------------------------------------------------------------------------------------------------------------------------------------------------------------------------------------------------------------------------------------------------------------------------------------------|
|                       | compared with placebo.                                                                                                                                                                                                                                                                                                                                                                                                                                                                                                                                                                                                                                                                                                                                                                                                                                                                                                                                                                                                                                                                                                                                                                                                                                                                                                                                                                                                                                                                                                                                                                                                                                                                                                                                                               |
| Secondary Endpoint(s) | <p>The following endpoints will be compared between the three treatment groups over the 12-week, double-blind maintenance period:</p> <ul style="list-style-type: none"> <li>• Number of patients experiencing a &gt;25% worsening, -25 to +25% no change, 25–50% improvement, 50–75% improvement or &gt;75% improvement in convulsive seizures from baseline.</li> <li>• Number of patients who are convulsive seizure free.</li> <li>• Percentage changes from baseline in non-convulsive seizure frequency.</li> <li>• Change in types of seizures.</li> <li>• Changes from baseline in usage of rescue medication.</li> <li>• Changes from baseline in number of inpatient hospitalizations due to epilepsy.</li> <li>• Changes from baseline in Sleep Disruption 0–10 Numerical Rating Scale (0–10 NRS) score.</li> <li>• Changes from baseline in Epworth Daytime Sleepiness Scale (EDSS) score.</li> <li>• Changes from baseline in the Quality of Life in Childhood Epilepsy (QOLCE) score.</li> <li>• Changes from baseline in the Vineland Adaptive Behavior Scales, Second Edition (Vineland-II) score.</li> <li>• Change in cognitive function as measured with a cognitive assessment battery.</li> <li>• Caregiver Global Impression of Change (CGIC).</li> </ul> <p>The safety profile of GWP42003-P compared with placebo will also be the assessed at each Dose Level by measuring:</p> <ul style="list-style-type: none"> <li>• Adverse events (AEs).</li> <li>• Vital signs.</li> <li>• Physical examination parameters.</li> <li>• 12-lead Electrocardiogram (ECG).</li> <li>• Laboratory parameters.</li> <li>• Columbia-Suicide Severity Rating Scale (C-SSRS) score.</li> <li>• Cannabis Withdrawal Scale (CWS) score.</li> <li>• Abuse liability.</li> </ul> |
| Sample Size           | <p>A total of 120 patients will be enrolled to receive one of two Dose Levels of active investigational medicinal product (IMP) or placebo on a 1:1:1 basis (40 patients per treatment group). Patients in the placebo group will be split into two cohorts (20 receiving Low Dose Level dosing volumes and 20 receiving High Dose Level dosing volumes), but it is assumed that these two cohorts can be pooled for the analyses</p>                                                                                                                                                                                                                                                                                                                                                                                                                                                                                                                                                                                                                                                                                                                                                                                                                                                                                                                                                                                                                                                                                                                                                                                                                                                                                                                                                |

129  
130  
131  
132  
133  
134  
135

|                                                |                                                                                                                                                                                                                                                                                                                                                                                                                                                                                                                                                                                                                                                                                                                                                                                                                                                                                                                                                                                                                                                                                                                                                                                                                                                                                                                                                                                                                                                                                                                                                                                                                                                                                                                                                                                                                                                                                                                                                                                                                                                                                                                                                                                                              |
|------------------------------------------------|--------------------------------------------------------------------------------------------------------------------------------------------------------------------------------------------------------------------------------------------------------------------------------------------------------------------------------------------------------------------------------------------------------------------------------------------------------------------------------------------------------------------------------------------------------------------------------------------------------------------------------------------------------------------------------------------------------------------------------------------------------------------------------------------------------------------------------------------------------------------------------------------------------------------------------------------------------------------------------------------------------------------------------------------------------------------------------------------------------------------------------------------------------------------------------------------------------------------------------------------------------------------------------------------------------------------------------------------------------------------------------------------------------------------------------------------------------------------------------------------------------------------------------------------------------------------------------------------------------------------------------------------------------------------------------------------------------------------------------------------------------------------------------------------------------------------------------------------------------------------------------------------------------------------------------------------------------------------------------------------------------------------------------------------------------------------------------------------------------------------------------------------------------------------------------------------------------------|
|                                                | <p>of efficacy.</p> <p>If it is assumed that patients in the placebo group will experience a mean reduction in convulsive seizure frequency of 10% (from baseline), this sample size of 40 patients per group will be sufficient to detect a difference of 40% between treatments (i.e., patients receiving GWP42003-P will experience at least a 50% reduction in convulsive seizures). This is based on a standard deviation of 63%, using a two-tailed 5% significance level and 80% power.</p>                                                                                                                                                                                                                                                                                                                                                                                                                                                                                                                                                                                                                                                                                                                                                                                                                                                                                                                                                                                                                                                                                                                                                                                                                                                                                                                                                                                                                                                                                                                                                                                                                                                                                                           |
| <p>Summary of Patient Eligibility Criteria</p> | <p><b>Inclusion:</b> Patients meeting the following criteria will be considered eligible for this study:</p> <ul style="list-style-type: none"> <li>• Patient and/or parent(s)/legal representative must be willing and able to give informed assent/consent for participation in the study (see <a href="#">Section 15.2</a>).</li> <li>• Patient and their caregiver must be willing and able (in the investigator's opinion) to comply with all study requirements.</li> <li>• Patient must be male or female aged between two and 18 years (inclusive).</li> <li>• Patient must have a documented history of DS which is not completely controlled by current antiepileptic drugs (AEDs).</li> <li>• Patient must be experiencing <b>four or more</b> convulsive seizures (i.e., tonic-clonic, tonic, clonic, atonic seizures) during the 28-day baseline observation period.</li> <li>• Patient must be taking one or more AEDs at a dose which has/have been stable for at least four weeks.</li> <li>• All medications or interventions for epilepsy (including ketogenic diet and vagus nerve stimulation) must have been stable for four weeks prior to screening and patient and caregiver are willing to maintain a stable regimen throughout the study.</li> <li>• Patient and/or parent(s)/legal representative is willing to allow his or her primary care practitioner and consultant to be notified of participation in the study.</li> </ul> <p><b>Exclusion:</b> The patient may not enter the study if ANY of the following apply:</p> <ul style="list-style-type: none"> <li>• Patient has clinically significant unstable medical conditions other than epilepsy.</li> <li>• Patient has had clinically relevant symptoms or a clinically significant illness in the four weeks prior to screening or randomization, other than epilepsy.</li> <li>• Patient has clinically significant abnormal laboratory values, in the investigator's opinion, at screening or randomization.</li> <li>• Patient has clinically relevant abnormalities in the ECG measured at screening or randomization.</li> <li>• Patient has any concurrent cardiovascular conditions which will, in</li> </ul> |

136  
137  
138  
139  
140  
141  
142

|  |                                                                                                                                                                                                                                                                                                                                                                                                                                                                                                                                                                                                                                                                                                                                                                                                                                                                                                                                                                                                                                                                                                                                                                                                                                                                                                                                                                                                                                                                                                                                                                                                                                                                                                                                                                                                                                                                                                                                                                                                                                                                                                                                                                                                                                                                                                                                                                                                                                                                                                                                                                                                                                                                                                                                                                                                                                                               |
|--|---------------------------------------------------------------------------------------------------------------------------------------------------------------------------------------------------------------------------------------------------------------------------------------------------------------------------------------------------------------------------------------------------------------------------------------------------------------------------------------------------------------------------------------------------------------------------------------------------------------------------------------------------------------------------------------------------------------------------------------------------------------------------------------------------------------------------------------------------------------------------------------------------------------------------------------------------------------------------------------------------------------------------------------------------------------------------------------------------------------------------------------------------------------------------------------------------------------------------------------------------------------------------------------------------------------------------------------------------------------------------------------------------------------------------------------------------------------------------------------------------------------------------------------------------------------------------------------------------------------------------------------------------------------------------------------------------------------------------------------------------------------------------------------------------------------------------------------------------------------------------------------------------------------------------------------------------------------------------------------------------------------------------------------------------------------------------------------------------------------------------------------------------------------------------------------------------------------------------------------------------------------------------------------------------------------------------------------------------------------------------------------------------------------------------------------------------------------------------------------------------------------------------------------------------------------------------------------------------------------------------------------------------------------------------------------------------------------------------------------------------------------------------------------------------------------------------------------------------------------|
|  | <p>the investigator's opinion, interfere with the ability to assess their ECGs.</p> <ul style="list-style-type: none"> <li>• Patient has a history or presence of alcohol or substance abuse within the last two years prior to the study or daily consumption of five or more alcohol-containing beverages.</li> <li>• Patient is currently using, or has in the past used, recreational or medicinal cannabis, or synthetic cannabinoid-based medications (including Sativex<sup>®</sup>) within the three months prior to study entry and is unwilling to abstain for the duration of the study.</li> <li>• Patient has a history of symptoms (e.g., dizziness, light-headedness, blurred vision, palpitations, weakness, syncope) related to a drop in blood pressure due to postural changes.</li> <li>• Patient has ingested alcohol in the 24-hour period prior to the first study visit and/or is unwilling to abstain from drinking alcohol throughout the treatment period.</li> <li>• Patient has any known or suspected hypersensitivity to cannabinoids or any of the excipients of the IMPs (e.g., sesame oil).</li> <li>• Female patient is of child bearing potential or male patient's partner is of child bearing potential; unless willing to ensure that they or their partner use effective contraception, for example oral contraception, double barrier, intra-uterine device, during the study and for three months thereafter (however a male condom should not be used in conjunction with a female condom).</li> <li>• Female patient is pregnant, lactating or planning pregnancy during the course of the study and for three months thereafter.</li> <li>• Patient has been part of a clinical trial involving another IMP in the previous six months.</li> <li>• Any other significant disease or disorder which, in the opinion of the investigator, may either put the patient at risk because of participation in the study, may influence the result of the study, or affect the patient's ability to participate in the study.</li> <li>• Patient has significantly impaired hepatic function at screening (Visit 1) or randomization (Visit 2) (Alanine aminotransferase [ALT] &gt;5 × upper limit of normal [ULN] or total bilirubin [TBL] &gt;2 × ULN) OR the ALT or Aspartate aminotransferase (AST) &gt;3 × ULN <b>and</b> (TBL &gt;2 × ULN <b>or</b> international normalized ratio [INR] &gt;1.5). <i>This criterion can only be confirmed once the laboratory results are available; patients randomized into the study who are later found not to meet this criterion should be withdrawn from the study.</i></li> <li>• Following a physical examination the patient has any abnormalities that, in the opinion of the investigator, would prevent the patient from safe participation in the study.</li> </ul> |
|--|---------------------------------------------------------------------------------------------------------------------------------------------------------------------------------------------------------------------------------------------------------------------------------------------------------------------------------------------------------------------------------------------------------------------------------------------------------------------------------------------------------------------------------------------------------------------------------------------------------------------------------------------------------------------------------------------------------------------------------------------------------------------------------------------------------------------------------------------------------------------------------------------------------------------------------------------------------------------------------------------------------------------------------------------------------------------------------------------------------------------------------------------------------------------------------------------------------------------------------------------------------------------------------------------------------------------------------------------------------------------------------------------------------------------------------------------------------------------------------------------------------------------------------------------------------------------------------------------------------------------------------------------------------------------------------------------------------------------------------------------------------------------------------------------------------------------------------------------------------------------------------------------------------------------------------------------------------------------------------------------------------------------------------------------------------------------------------------------------------------------------------------------------------------------------------------------------------------------------------------------------------------------------------------------------------------------------------------------------------------------------------------------------------------------------------------------------------------------------------------------------------------------------------------------------------------------------------------------------------------------------------------------------------------------------------------------------------------------------------------------------------------------------------------------------------------------------------------------------------------|

143  
144  
145  
146  
147  
148  
149

|                                                                                            |                                                                                                                                                                                                                                                                                                                                                                                                                                                                                                                                                                                                                                                                                                                                                                                                                                                                                                                                                                                                                                                                                                                                                                                                                                                                           |
|--------------------------------------------------------------------------------------------|---------------------------------------------------------------------------------------------------------------------------------------------------------------------------------------------------------------------------------------------------------------------------------------------------------------------------------------------------------------------------------------------------------------------------------------------------------------------------------------------------------------------------------------------------------------------------------------------------------------------------------------------------------------------------------------------------------------------------------------------------------------------------------------------------------------------------------------------------------------------------------------------------------------------------------------------------------------------------------------------------------------------------------------------------------------------------------------------------------------------------------------------------------------------------------------------------------------------------------------------------------------------------|
|                                                                                            | <ul style="list-style-type: none"> <li>• Patient is unwilling to abstain from donation of blood during the study.</li> <li>• There are plans for the patient to travel outside their country of residence during the study.</li> <li>• Patient has previously been randomized into this study.</li> <li>• Any history of suicidal behavior or any suicidal ideation of type four or five on the C-SSRS at screening.</li> </ul>                                                                                                                                                                                                                                                                                                                                                                                                                                                                                                                                                                                                                                                                                                                                                                                                                                           |
| Criteria for Withdrawal                                                                    | <ul style="list-style-type: none"> <li>• Administrative decision by the investigator or GW Research Ltd or Regulatory Authority.</li> <li>• Pregnancy.</li> <li>• Protocol deviation that is considered to potentially compromise the safety of the patient.</li> <li>• Withdrawal of patient consent/assent.</li> <li>• Withdrawal of parent(s)/legal representative consent.</li> <li>• Lost to follow-up.</li> <li>• Patient non-compliance.</li> <li>• AE which, in the investigator's opinion, compromises the safety of the patient continuing in the study.</li> <li>• ALT or AST <math>&gt;3 \times</math> ULN with the appearance of fatigue, nausea, vomiting, right upper quadrant pain or tenderness, fever, rash, and/or eosinophilia (<math>&gt;5\%</math>).</li> <li>• ALT or AST <math>&gt;8 \times</math> ULN.</li> <li>• ALT or AST <math>&gt;5 \times</math> ULN for more than two weeks.</li> <li>• ALT <math>&gt;3 \times</math> ULN or AST <math>&gt;3 \times</math> ULN <b>and</b> (TBL <math>&gt;2 \times</math> ULN <b>or</b> INR <math>&gt;1.5</math>).</li> <li>• Any evidence of drug abuse or diversion.</li> <li>• Suicidal ideation or behavior of type four or five during the treatment period, as evaluated with the C-SSRS.</li> </ul> |
| Investigational Medicinal Product: Dosage, Regimen, Formulation and Mode of Administration | <p>GWP42003-P oral solution (100 mg/mL cannabidiol in sesame oil with anhydrous ethanol, added sweetener [sucralose] and strawberry flavoring).</p> <p>Placebo oral solution containing the excipients sesame oil and anhydrous ethanol with added sweetener (sucralose) and strawberry flavoring.</p> <p>Dosage: Patients will titrate the IMP to the target Dose Level. Patients will then remain at this Dose Level for the duration of the treatment period of the study.</p> <p>The High Dose Level will be determined by the DSMC of Part A of study GWEP1332. The maximum dose considered will be 20 mg/kg/day.</p> <p>The Low Dose Level will be defined as 50% of the High Dose Level.</p>                                                                                                                                                                                                                                                                                                                                                                                                                                                                                                                                                                       |



150  
151  
152  
153  
154  
155  
156

|               |                                                                                                                                                                                                                                                                                                                                                                                                                                                                                                                                                                                                                                                                                                                                                                                                                                                                                                                                                                                                                                                                                                                                                                                                                                                                                                                                                                                                                                                                                                                                                                                                                                                                                                                                                                                                                                                                                                                                                                                                                                                                                                                                                                                                                                                                                                                                                                                                                                                                                                                                                                                                                                                                                                                                                                                                                                                                                                                                                                                                                                                 |
|---------------|-------------------------------------------------------------------------------------------------------------------------------------------------------------------------------------------------------------------------------------------------------------------------------------------------------------------------------------------------------------------------------------------------------------------------------------------------------------------------------------------------------------------------------------------------------------------------------------------------------------------------------------------------------------------------------------------------------------------------------------------------------------------------------------------------------------------------------------------------------------------------------------------------------------------------------------------------------------------------------------------------------------------------------------------------------------------------------------------------------------------------------------------------------------------------------------------------------------------------------------------------------------------------------------------------------------------------------------------------------------------------------------------------------------------------------------------------------------------------------------------------------------------------------------------------------------------------------------------------------------------------------------------------------------------------------------------------------------------------------------------------------------------------------------------------------------------------------------------------------------------------------------------------------------------------------------------------------------------------------------------------------------------------------------------------------------------------------------------------------------------------------------------------------------------------------------------------------------------------------------------------------------------------------------------------------------------------------------------------------------------------------------------------------------------------------------------------------------------------------------------------------------------------------------------------------------------------------------------------------------------------------------------------------------------------------------------------------------------------------------------------------------------------------------------------------------------------------------------------------------------------------------------------------------------------------------------------------------------------------------------------------------------------------------------------|
|               | IMP will be taken twice daily (morning and evening).                                                                                                                                                                                                                                                                                                                                                                                                                                                                                                                                                                                                                                                                                                                                                                                                                                                                                                                                                                                                                                                                                                                                                                                                                                                                                                                                                                                                                                                                                                                                                                                                                                                                                                                                                                                                                                                                                                                                                                                                                                                                                                                                                                                                                                                                                                                                                                                                                                                                                                                                                                                                                                                                                                                                                                                                                                                                                                                                                                                            |
| Control Group | The control group will receive placebo matching the assigned IMP Dose Level.                                                                                                                                                                                                                                                                                                                                                                                                                                                                                                                                                                                                                                                                                                                                                                                                                                                                                                                                                                                                                                                                                                                                                                                                                                                                                                                                                                                                                                                                                                                                                                                                                                                                                                                                                                                                                                                                                                                                                                                                                                                                                                                                                                                                                                                                                                                                                                                                                                                                                                                                                                                                                                                                                                                                                                                                                                                                                                                                                                    |
| Procedures    | <p>During Visit 1 (Day –28), the following assessments will be made: demographics, medical history (including seizure frequency over the last six months and voltage-gated sodium channel <math>\alpha 1</math> subunit gene [<i>SCN1A</i>] mutation status), vital signs, postural blood pressure, physical examination (including height and body weight), ECG, C-SSRS (Children’s Baseline), and visit procedure-related AEs. If the mutation status of <i>SCN1A</i> is unknown, a blood sample will be taken for <i>SCN1A</i> analysis (this can be taken at any visit during the study). Clinical laboratory samples (urine [where possible] and blood) will be taken for hematology, biochemistry, urinalysis, a urine <math>\Delta^9</math>-tetrahydrocannabinol (THC) screen and a serum pregnancy test (if appropriate). Patients or their caregivers will also be asked for information regarding concomitant medications and/or changes to medication (including AEDs). Eligible patients will then begin the 28-day baseline observation period. Patients or their caregivers will be issued with Interactive Voice Response System (IVRS) details and will be instructed on how to use it to record daily seizure information. Patients or their caregivers will also be given a paper diary to record usage of rescue medication, concomitant AEDs and AEs, and will be instructed on how to do so.</p> <p>At each subsequent clinic visit (Visits 2, 3, 4, 6 and 8), the following assessments will be made: vital signs, physical examination (including height and body weight), ECG, EDSS, Sleep Disruption 0–10 NRS, CGIC (assessment not completed at Visit 2), cognitive assessment battery (Visits 2 and 8 only), QOLCE (Visits 2 and 8 only), C-SSRS (Children’s Last Visit) and the Vineland-II. Clinical laboratory samples (urine [where possible] and blood) will be taken for hematology, biochemistry and urinalysis. The patient’s IVRS report and paper diary will be reviewed and the information recorded along with information regarding AEs, epilepsy-related hospitalizations, concomitant medications and/or changes to medication (including AEDs). The investigator must assess adherence to the dosing regimen from Visit 2 onwards.</p> <p>After 28 (<math>\pm 3</math>) days, patients will return to the clinic at Visit 2 (Day 1). In addition to the above assessments, postural blood pressure and the CWS will be assessed and a test to detect THC and a pregnancy test, if appropriate, will also be performed. The investigator will assess the patient’s daily number of convulsive seizures from the patient’s IVRS data. Patients who have experienced four or more convulsive seizures (i.e., tonic-clonic, tonic, clonic or atonic seizures) during the baseline period and who meet all of the other inclusion and none of the exclusion criteria will be eligible to continue in the study. If a patient does not meet the eligibility criteria within this period, consideration</p> |

157  
158  
159  
160  
161  
162  
163

|  |                                                                                                                                                                                                                                                                                                                                                                                                                                                                                                                                                                                                                                                                                                                                                                                                                                                                                                                                                                                                                                                                                                                                                                                                                                                                                                                                                                                                                                                                                                                                                                                                                                                                                                                                                                                                                                                                                                                                                                                                                                                                                                                                                                                                                                                                                                                                                                                                                                                                                                                                                                                                                                                                                                                                                                                                                                                                                                                                                                                                                                                                                                                                                                                |
|--|--------------------------------------------------------------------------------------------------------------------------------------------------------------------------------------------------------------------------------------------------------------------------------------------------------------------------------------------------------------------------------------------------------------------------------------------------------------------------------------------------------------------------------------------------------------------------------------------------------------------------------------------------------------------------------------------------------------------------------------------------------------------------------------------------------------------------------------------------------------------------------------------------------------------------------------------------------------------------------------------------------------------------------------------------------------------------------------------------------------------------------------------------------------------------------------------------------------------------------------------------------------------------------------------------------------------------------------------------------------------------------------------------------------------------------------------------------------------------------------------------------------------------------------------------------------------------------------------------------------------------------------------------------------------------------------------------------------------------------------------------------------------------------------------------------------------------------------------------------------------------------------------------------------------------------------------------------------------------------------------------------------------------------------------------------------------------------------------------------------------------------------------------------------------------------------------------------------------------------------------------------------------------------------------------------------------------------------------------------------------------------------------------------------------------------------------------------------------------------------------------------------------------------------------------------------------------------------------------------------------------------------------------------------------------------------------------------------------------------------------------------------------------------------------------------------------------------------------------------------------------------------------------------------------------------------------------------------------------------------------------------------------------------------------------------------------------------------------------------------------------------------------------------------------------------|
|  | <p>will be given to rescreen at a later date. Eligible patients will then be randomized to receive one of two Dose Levels of GWP42003-P or placebo in a 1:1:1 allocation ratio using the IVRS. Patients in the placebo group will be split into two equivalent cohorts; half receiving Low Dose Level dosing volumes and half receiving High Dose Level dosing volumes.</p> <p>At Visit 2, caregivers will be asked to write a brief description of the patient's overall condition as a memory aid for the CGIC at subsequent visits or withdrawal.</p> <p>Patients will then receive sufficient IMP, as assigned by the IVRS, every 28 to 42 days for the 14-week treatment period. Each patient will take their first dose of IMP at Visit 2 (Day 1). Patients or their caregivers will be instructed on using the IVRS's daily dosing record, as well as how to record IMP dosing information in the paper diary.</p> <p>Patients will titrate to their target Dose Level using the regimen provided via the IVRS. If an unacceptable AE develops at any time during titration, dosing should initially be suspended or amended, as appropriate, until the event has resolved. After titration, patients should continue on a stable dosing regimen at the dose they achieved at the end of the titration period. If that dose becomes poorly tolerated during the post-titration period, the investigator may consider temporarily or permanently reducing the dose for the remainder of the study. However, where possible, the patient should be encouraged to return to the target dose.</p> <p>Patients will return to the clinic for further visits at Visit 3 (Day 15±3), Visit 4 (Day 29±3), Visit 6 (Day 57±3) and Visit 8 (Day 99±3). Adherence to the titration regimen and compliance will be assessed for safety reasons. Additional safety assessments will be made by telephone at Visit 5 (Day 43±3) and at Visit 7 (Day 71±3). During these calls, patients or their caregivers will be asked for information regarding AEs, epilepsy-related hospitalizations, concomitant medications and/or changes to their medication (including AEDs).</p> <p>Visit 8 is the 'End of Treatment' visit and a test to detect THC and a pregnancy test (if appropriate) will be performed. The Caregiver Impression of IMP Palatability will also be assessed.</p> <p>At Visit 8, patients who have completed all of the scheduled study visits will be offered the option to enter an OLE study. Entry is to be on the same day as Visit 8 (Day 99) or within seven days of Visit 8. Patients not entering the OLE study at this visit will commence a taper period (down-titrating 10% per day for 10 days), and additional IMP will be dispensed, if required. Patients who require early termination prior to Visit 8 should also begin the taper period at the time the decision is made to discontinue (unless continued dosing is not possible due to an AE). The IVRS will generate the patient's daily IMP dosing volumes for the 10-day taper period, during which time IVRS and diary information will continue to be recorded. The taper period may be</p> |
|--|--------------------------------------------------------------------------------------------------------------------------------------------------------------------------------------------------------------------------------------------------------------------------------------------------------------------------------------------------------------------------------------------------------------------------------------------------------------------------------------------------------------------------------------------------------------------------------------------------------------------------------------------------------------------------------------------------------------------------------------------------------------------------------------------------------------------------------------------------------------------------------------------------------------------------------------------------------------------------------------------------------------------------------------------------------------------------------------------------------------------------------------------------------------------------------------------------------------------------------------------------------------------------------------------------------------------------------------------------------------------------------------------------------------------------------------------------------------------------------------------------------------------------------------------------------------------------------------------------------------------------------------------------------------------------------------------------------------------------------------------------------------------------------------------------------------------------------------------------------------------------------------------------------------------------------------------------------------------------------------------------------------------------------------------------------------------------------------------------------------------------------------------------------------------------------------------------------------------------------------------------------------------------------------------------------------------------------------------------------------------------------------------------------------------------------------------------------------------------------------------------------------------------------------------------------------------------------------------------------------------------------------------------------------------------------------------------------------------------------------------------------------------------------------------------------------------------------------------------------------------------------------------------------------------------------------------------------------------------------------------------------------------------------------------------------------------------------------------------------------------------------------------------------------------------------|

164  
165  
166  
167  
168  
169  
170

|  |                                                                                                                                                                                                                                                                                                                                                                                                                                                                                                                                                                                                                                                                                                                                                                                                                                                                                                                                                                                                                                                                                                                                                                                                                                                                                                                                                                                                                                                                                                                                                                                                                                                                                                                                                                                                                                                                                                                                                                                                                                                                                                                                                                                                                                                                                                                                                                                                                                                                                                                                                                                                                                                                                                                                                                                                                                                                                                                                                             |
|--|-------------------------------------------------------------------------------------------------------------------------------------------------------------------------------------------------------------------------------------------------------------------------------------------------------------------------------------------------------------------------------------------------------------------------------------------------------------------------------------------------------------------------------------------------------------------------------------------------------------------------------------------------------------------------------------------------------------------------------------------------------------------------------------------------------------------------------------------------------------------------------------------------------------------------------------------------------------------------------------------------------------------------------------------------------------------------------------------------------------------------------------------------------------------------------------------------------------------------------------------------------------------------------------------------------------------------------------------------------------------------------------------------------------------------------------------------------------------------------------------------------------------------------------------------------------------------------------------------------------------------------------------------------------------------------------------------------------------------------------------------------------------------------------------------------------------------------------------------------------------------------------------------------------------------------------------------------------------------------------------------------------------------------------------------------------------------------------------------------------------------------------------------------------------------------------------------------------------------------------------------------------------------------------------------------------------------------------------------------------------------------------------------------------------------------------------------------------------------------------------------------------------------------------------------------------------------------------------------------------------------------------------------------------------------------------------------------------------------------------------------------------------------------------------------------------------------------------------------------------------------------------------------------------------------------------------------------------|
|  | <p>interrupted if the patient wishes to enter the OLE study within the seven days of Visit 8.</p> <p>Following completion or cessation of the taper period, patients will return to the clinic for Visit 9 ('End of Taper Period' Visit) where the following assessments will be made: vital signs, physical examination (including height and body weight), C-SSRS (Children's Last Visit) and CWS. The patient's IVRS report and paper diary will be reviewed and the information recorded along with information regarding AEs, epilepsy-related hospitalizations, concomitant medications and/or changes to medication (including AEDs). For patients not entering the OLE study, Visit 9 should occur 10 (+3) days after Visit 8 (i.e., on Day 109[+3]). For patients who delay entry into the OLE study, Visit 9 should occur on the day the patient enters the OLE study and within seven days of Visit 8 (i.e., up to Day 106), to allow the patient to enter the OLE study within this timeframe.</p> <p>A safety follow-up visit (Visit 10) is required for patients who do not enter the OLE study or who withdraw from the study early. This visit should occur four weeks after Visit 9 (i.e., on Day 137±3), or withdrawal from treatment, and can be conducted by telephone. Patients or their caregivers will be asked for information on AEs, epilepsy-related hospitalizations, concomitant medications and/or changes to medication (including AEDs).</p> <p>For patients not entering the OLE study, safety telephone calls will be made weekly (±3 days) from Visit 9 until Visit 10.</p> <p>Patients who enter the OLE study on Day 99 will not attend Visits 9 or 10.</p> <p><b><u>Monitoring of Drug Abuse Liability (for patients 12 years of age and older):</u></b></p> <p>During the routine collection of AEs in this study, if AEs are reported which can illuminate an abuse potential signal (specific AEs detailed in <a href="#">Section 9.1.15.1.1</a>), then the investigator or study coordinator is required to complete an additional Supplemental Adverse Event Form and a Site Classification Form (investigator only) following further discussion of the event(s) with the patient/caregiver.</p> <p>The second trigger that will require the investigator or study coordinator to discuss abuse potential signals with the patient/caregiver is drug accountability issues regarding overuse of the IMP or missing bottles.</p> <p>Irrespective of the above, all patients/caregivers will be interviewed at their final dosing visit (Visit 8/9) or withdrawal visit and a Study Medication Use and Behavior Survey will be completed by the investigator or study coordinator.</p> <p>A formal Adjudication Committee will be appointed and assigned to this initiative to classify triggered cases. The Adjudication Committee will meet on a periodic basis to review and assess all of the information</p> |
|--|-------------------------------------------------------------------------------------------------------------------------------------------------------------------------------------------------------------------------------------------------------------------------------------------------------------------------------------------------------------------------------------------------------------------------------------------------------------------------------------------------------------------------------------------------------------------------------------------------------------------------------------------------------------------------------------------------------------------------------------------------------------------------------------------------------------------------------------------------------------------------------------------------------------------------------------------------------------------------------------------------------------------------------------------------------------------------------------------------------------------------------------------------------------------------------------------------------------------------------------------------------------------------------------------------------------------------------------------------------------------------------------------------------------------------------------------------------------------------------------------------------------------------------------------------------------------------------------------------------------------------------------------------------------------------------------------------------------------------------------------------------------------------------------------------------------------------------------------------------------------------------------------------------------------------------------------------------------------------------------------------------------------------------------------------------------------------------------------------------------------------------------------------------------------------------------------------------------------------------------------------------------------------------------------------------------------------------------------------------------------------------------------------------------------------------------------------------------------------------------------------------------------------------------------------------------------------------------------------------------------------------------------------------------------------------------------------------------------------------------------------------------------------------------------------------------------------------------------------------------------------------------------------------------------------------------------------------------|

171  
172  
173  
174  
175  
176  
177

|                            |                                                                                                                                                                                                                                                                                                                                                                                                                                                                                                                                                                                                                                                                                                                                                                                                                                                                                                                                                                                                                                                                                                                                                                                                                                                                                                                                                                    |
|----------------------------|--------------------------------------------------------------------------------------------------------------------------------------------------------------------------------------------------------------------------------------------------------------------------------------------------------------------------------------------------------------------------------------------------------------------------------------------------------------------------------------------------------------------------------------------------------------------------------------------------------------------------------------------------------------------------------------------------------------------------------------------------------------------------------------------------------------------------------------------------------------------------------------------------------------------------------------------------------------------------------------------------------------------------------------------------------------------------------------------------------------------------------------------------------------------------------------------------------------------------------------------------------------------------------------------------------------------------------------------------------------------|
|                            | collected on triggered cases.                                                                                                                                                                                                                                                                                                                                                                                                                                                                                                                                                                                                                                                                                                                                                                                                                                                                                                                                                                                                                                                                                                                                                                                                                                                                                                                                      |
| Statistical Considerations | <p>The following endpoints will be described and compared between the three treatment groups, using appropriate statistical methods, over the 12-week, double-blind maintenance period:</p> <ul style="list-style-type: none"> <li>• Mean percentage change from baseline in the frequency of convulsive seizures.</li> <li>• Number of patients experiencing a &gt;25% worsening, -25 to +25% no change, 25–50% improvement, 50–75% improvement or &gt;75% improvement in convulsive seizures from baseline.</li> <li>• Number of patients who are convulsive seizure free.</li> <li>• Percentage change from baseline in non-convulsive seizure frequency.</li> <li>• Change in types of seizures.</li> <li>• Change from baseline in use of rescue medication.</li> <li>• Change from baseline in number of inpatient hospitalizations due to epilepsy.</li> <li>• Change from baseline in Sleep Disruption 0–10 NRS score.</li> <li>• Change from baseline in EDSS score.</li> <li>• Change from baseline in QOLCE score.</li> <li>• Change from baseline in cognitive assessment battery.</li> <li>• Change from baseline in Vineland-II score.</li> <li>• CGIC.</li> </ul> <p>All statistical tests will be two-tailed and carried out at the 5% level of significance.</p> <p>All safety data will be summarized using appropriate statistical methods.</p> |
| Sponsor                    | <p>GW Research Ltd<br/>Porton Down Science Park<br/>Salisbury<br/>Wiltshire SP4 0JQ</p>                                                                                                                                                                                                                                                                                                                                                                                                                                                                                                                                                                                                                                                                                                                                                                                                                                                                                                                                                                                                                                                                                                                                                                                                                                                                            |

**Figure 1-1 Study Design and Treatment Schema**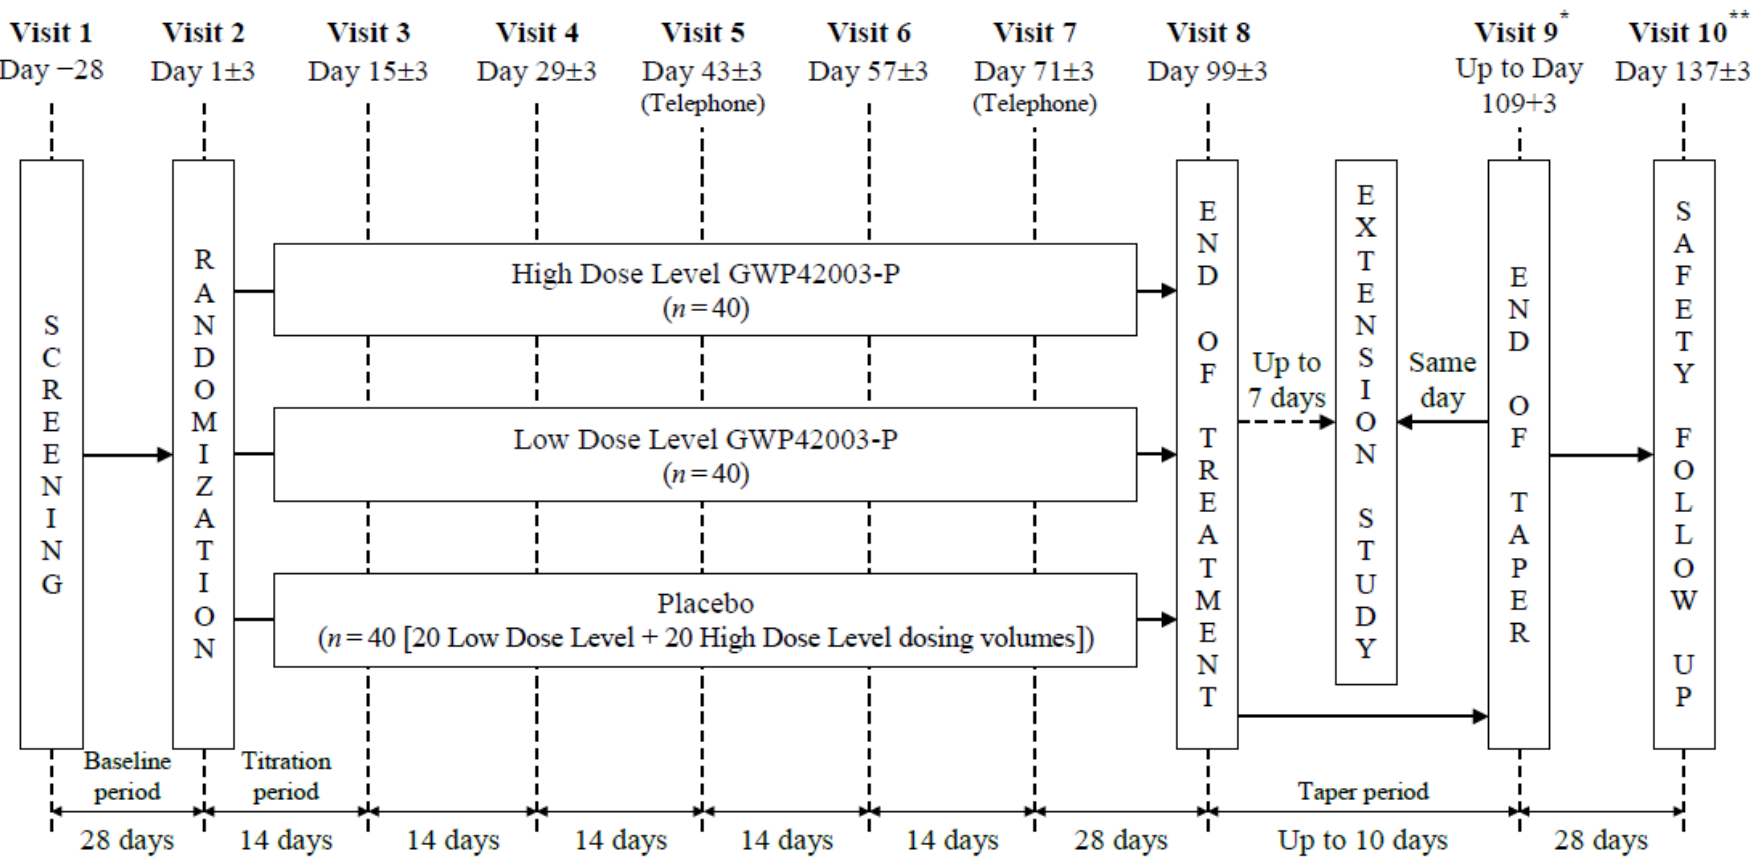

182 \* For patients not entering the OLE study at Visit 8. Patients who opt not to enter the OLE study must have weekly (□3 days) safety telephone calls until Visit 10.

183 \*\* For patients not entering the OLE study; can be conducted by telephone.

## Table of Contents

|     |                                                                   |           |
|-----|-------------------------------------------------------------------|-----------|
| 184 |                                                                   |           |
| 185 |                                                                   |           |
| 186 |                                                                   |           |
| 187 |                                                                   |           |
| 188 |                                                                   |           |
| 189 |                                                                   |           |
| 190 |                                                                   |           |
|     |                                                                   |           |
| 191 | <b>Title Page .....</b>                                           | <b>1</b>  |
| 192 | <b>1 PROTOCOL SYNOPSIS.....</b>                                   | <b>3</b>  |
| 193 | <b>Table of Contents.....</b>                                     | <b>13</b> |
| 194 | <b>Table of Appendices .....</b>                                  | <b>18</b> |
| 195 | <b>List of In-text Tables .....</b>                               | <b>19</b> |
| 196 | <b>List of In-text Figures.....</b>                               | <b>20</b> |
| 197 | <b>List of Abbreviations .....</b>                                | <b>21</b> |
| 198 | <b>Definition of Terms.....</b>                                   | <b>23</b> |
| 199 | <b>2 OBJECTIVES.....</b>                                          | <b>24</b> |
| 200 | 2.1 Primary .....                                                 | 24        |
| 201 | 2.2 Secondary .....                                               | 24        |
| 202 | <b>3 BACKGROUND AND RATIONALE.....</b>                            | <b>25</b> |
| 203 | 3.1 Disease.....                                                  | 25        |
| 204 | 3.2 GWP42003-P Background.....                                    | 28        |
| 205 | 3.3 Rationale.....                                                | 29        |
| 206 | 3.3.1 Selection of Study Dose.....                                | 29        |
| 207 | 3.4 Clinical Hypothesis .....                                     | 30        |
| 208 | <b>4 EXPERIMENTAL PLAN.....</b>                                   | <b>31</b> |
| 209 | 4.1 Study Design .....                                            | 31        |
| 210 | 4.1.1 Primary Endpoint.....                                       | 31        |
| 211 | 4.1.2 Secondary Endpoint(s).....                                  | 31        |
| 212 | 4.2 Number of Centers .....                                       | 32        |
| 213 | 4.3 Number of Patients .....                                      | 32        |
| 214 | <b>5 INVESTIGATIONAL MEDICINAL PRODUCT .....</b>                  | <b>33</b> |
| 215 | 5.1 GWP42003-P Oral Solution.....                                 | 33        |
| 216 | 5.2 Placebo Oral Solution.....                                    | 33        |
| 217 | 5.3 Packaging, Storage and Drug Accountability .....              | 33        |
| 218 | 5.3.1 Packaging and Labelling.....                                | 33        |
| 219 | 5.3.2 Storage .....                                               | 34        |
| 220 | 5.3.3 Supply and Return of Investigational Medicinal Product..... | 34        |

|     |          |                                                                     |           |
|-----|----------|---------------------------------------------------------------------|-----------|
| 221 |          |                                                                     |           |
| 222 |          |                                                                     |           |
| 223 |          |                                                                     |           |
| 224 |          |                                                                     |           |
| 225 |          |                                                                     |           |
| 226 | 5.3.4    | Investigational Medicinal Product Accountability .....              | 35        |
| 227 | <b>6</b> | <b>PATIENT ELIGIBILITY .....</b>                                    | <b>36</b> |
| 228 | 6.1      | Inclusion Criteria .....                                            | 36        |
| 229 | 6.2      | Exclusion Criteria.....                                             | 36        |
| 230 | <b>7</b> | <b>PATIENT ENROLLMENT .....</b>                                     | <b>39</b> |
| 231 | 7.1      | Treatment Assignment .....                                          | 39        |
| 232 | 7.2      | Randomization.....                                                  | 39        |
| 233 | <b>8</b> | <b>TREATMENT PROCEDURES.....</b>                                    | <b>40</b> |
| 234 | 8.1      | Investigational Medicinal Product Dosage, Administration and        |           |
| 235 |          | Schedule .....                                                      | 40        |
| 236 | 8.1.1    | Dose Administration .....                                           | 40        |
| 237 | 8.1.2    | Dose Escalation, Dose Adjustments and Down-Titration .....          | 40        |
| 238 | 8.2      | Concomitant Therapy .....                                           | 41        |
| 239 | 8.3      | Prohibited Therapy During Study Period .....                        | 41        |
| 240 | 8.4      | Compliance in Investigational Medicinal Product Administration..... | 42        |
| 241 | 8.5      | Access to Blinded Treatment Assignment .....                        | 42        |
| 242 | <b>9</b> | <b>STUDY PROCEDURES .....</b>                                       | <b>44</b> |
| 243 | 9.1      | Study Procedure Listing .....                                       | 44        |
| 244 | 9.1.1    | Informed Consent/Assent .....                                       | 44        |
| 245 | 9.1.2    | Demographics .....                                                  | 45        |
| 246 | 9.1.3    | Medical History .....                                               | 45        |
| 247 | 9.1.4    | Inpatient Epilepsy-Related Hospitalizations.....                    | 45        |
| 248 | 9.1.5    | Concomitant Medication .....                                        | 45        |
| 249 | 9.1.6    | Physical Examination .....                                          | 46        |
| 250 | 9.1.7    | Vital Signs .....                                                   | 46        |
| 251 | 9.1.8    | 12-Lead Electrocardiogram .....                                     | 46        |
| 252 | 9.1.9    | Clinical Laboratory Sampling.....                                   | 46        |
| 253 | 9.1.10   | Interactive Voice Response System.....                              | 48        |
| 254 | 9.1.11   | Questionnaires and Assessments Completed at Scheduled Visits.....   | 48        |
| 255 | 9.1.11.1 | Sleep Disruption 0–10 Numerical Rating Scale.....                   | 48        |
| 256 | 9.1.11.2 | Epworth Daytime Sleepiness Scale.....                               | 49        |
| 257 | 9.1.11.3 | Caregiver Global Impression of Change.....                          | 49        |
| 258 | 9.1.11.4 | Quality of Life in Childhood Epilepsy .....                         | 49        |

|     |            |                                                                  |           |
|-----|------------|------------------------------------------------------------------|-----------|
| 259 |            |                                                                  |           |
| 260 |            |                                                                  |           |
| 261 |            |                                                                  |           |
| 262 |            |                                                                  |           |
| 263 |            |                                                                  |           |
| 264 | 9.1.11.5   | Cognitive Assessment Battery .....                               | 50        |
| 265 | 9.1.11.6   | Vineland Adaptive Behavior Scales (Second Edition) .....         | 51        |
| 266 | 9.1.11.7   | Columbia-Suicide Severity Rating Scale (Children’s).....         | 51        |
| 267 | 9.1.11.8   | Caregiver Impression of Investigational Medicinal Product        |           |
| 268 |            | Palatability .....                                               | 51        |
| 269 | 9.1.11.9   | Cannabis Withdrawal Scale .....                                  | 52        |
| 270 | 9.1.12     | Patient Diary .....                                              | 52        |
| 271 | 9.1.13     | Investigational Medicinal Product Accountability .....           | 52        |
| 272 | 9.1.14     | Adverse Events .....                                             | 53        |
| 273 | 9.1.15     | Monitoring of Drug Abuse Liability (for Patients 12 Years of Age |           |
| 274 |            | and Older) .....                                                 | 53        |
| 275 | 9.1.15.1   | Monitoring of Adverse Events .....                               | 54        |
| 276 | 9.1.15.1.1 | List of ‘Triggering Adverse Events of Interest’ .....            | 54        |
| 277 | 9.1.15.1.2 | Supplemental Adverse Event Form.....                             | 54        |
| 278 | 9.1.15.2   | Monitoring Drug Accountability Discrepancies .....               | 55        |
| 279 | 9.1.15.2.1 | List of ‘Triggering Drug Accountability Discrepancies’.....      | 55        |
| 280 | 9.1.15.2.2 | Supplemental Drug Accountability Form.....                       | 55        |
| 281 | 9.1.15.3   | Site Classification Form.....                                    | 56        |
| 282 | 9.1.15.4   | Study Medication Use and Behavior Survey .....                   | 56        |
| 283 | 9.1.15.5   | Adjudication Committee: Assessment of Abuse Potential of         |           |
| 284 |            | GWP42003-P .....                                                 | 56        |
| 285 | 9.2        | Study Procedures by Visit .....                                  | 59        |
| 286 | 9.2.1      | Visit 1 (Day –28, Screening) .....                               | 59        |
| 287 | 9.2.2      | Visit 2 (Day 1, Randomization) .....                             | 60        |
| 288 | 9.2.3      | Visit 3 (Day 15) .....                                           | 61        |
| 289 | 9.2.4      | Visit 4 (Day 29) .....                                           | 61        |
| 290 | 9.2.5      | Visit 5 (Day 43, Safety Telephone Call).....                     | 62        |
| 291 | 9.2.6      | Visit 6 (Day 57) .....                                           | 62        |
| 292 | 9.2.7      | Visit 7 (Day 71, Safety Telephone Call).....                     | 62        |
| 293 | 9.2.8      | Visit 8 (Day 99, End of Treatment) .....                         | 63        |
| 294 | 9.2.9      | Visit 9 (Day 100–106 or Day 109, End of Taper Period).....       | 64        |
| 295 | 9.2.10     | Visit 10 (Day 137, Safety Follow-Up).....                        | 64        |
| 296 | 9.2.11     | Safety Telephone Calls .....                                     | 65        |
| 297 | <b>10</b>  | <b>WITHDRAWAL.....</b>                                           | <b>66</b> |



|     |           |                                                                 |
|-----|-----------|-----------------------------------------------------------------|
| 298 |           |                                                                 |
| 299 |           |                                                                 |
| 300 |           |                                                                 |
| 301 |           |                                                                 |
| 302 | <b>11</b> | <b>URGENT SAFETY MEASURES .....68</b>                           |
| 303 | <b>12</b> | <b>ADVERSE EVENT REPORTING .....69</b>                          |
| 304 | 12.1      | Definitions ..... 69                                            |
| 305 | 12.1.1    | Adverse Event..... 69                                           |
| 306 | 12.1.2    | Investigator ..... 69                                           |
| 307 | 12.2      | Serious Adverse Events..... 69                                  |
| 308 | 12.3      | Reporting Procedures for Serious Adverse Events ..... 70        |
| 309 | 12.3.1    | Potential Cases of Drug-Induced Liver Injury..... 71            |
| 310 | 12.4      | Pregnancy ..... 71                                              |
| 311 | 12.5      | Causality Assessment ..... 71                                   |
| 312 | 12.6      | Reporting Procedures for All Adverse Events ..... 72            |
| 313 | 12.7      | Follow-up Procedures for Adverse Events..... 74                 |
| 314 | 12.8      | Reporting Clinically Significant Laboratory Results ..... 74    |
| 315 | 12.9      | Notification of Safety Information to Investigators, Regulatory |
| 316 |           | Authorities and Ethics Committees ..... 75                      |
| 317 | <b>13</b> | <b>STATISTICAL CONSIDERATIONS.....77</b>                        |
| 318 | 13.1      | Sample Size, Power and Significance Levels ..... 77             |
| 319 | 13.2      | Interim Analysis ..... 77                                       |
| 320 | 13.3      | Analysis Sets ..... 77                                          |
| 321 | 13.3.1    | Protocol Deviations ..... 78                                    |
| 322 | 13.4      | General Considerations ..... 78                                 |
| 323 | 13.5      | Accountability and Background Characteristics ..... 78          |
| 324 | 13.5.1    | Enrollment and Disposition ..... 78                             |
| 325 | 13.5.2    | Baseline and Demographic Characteristics ..... 78               |
| 326 | 13.5.3    | Medical History ..... 78                                        |
| 327 | 13.5.4    | Concomitant Medication ..... 79                                 |
| 328 | 13.6      | Endpoints and Statistical Methods ..... 79                      |
| 329 | 13.6.1    | Evaluable Period ..... 79                                       |
| 330 | 13.6.2    | Primary Endpoint(s)..... 80                                     |
| 331 | 13.6.3    | Secondary Endpoint(s)..... 80                                   |
| 332 | 13.6.4    | Handling of Missing Data..... 81                                |
| 333 | 13.6.5    | Safety ..... 82                                                 |
| 334 | 13.6.5.1  | Treatment Compliance and Extent of Treatment Exposure ..... 82  |

|     |              |                                                                     |           |
|-----|--------------|---------------------------------------------------------------------|-----------|
| 335 |              |                                                                     |           |
| 336 |              |                                                                     |           |
| 337 |              |                                                                     |           |
| 338 |              |                                                                     |           |
| 339 |              |                                                                     |           |
| 340 | 13.6.5.2     | Adverse Events.....                                                 | 82        |
| 341 | 13.6.5.3     | Clinical Laboratory Data.....                                       | 83        |
| 342 | 13.6.5.4     | Vital Signs, 12-lead Electrocardiogram, Physical Examination,       |           |
| 343 |              | Columbia-Suicide Severity Rating Scale and Other Safety Data.....   | 83        |
| 344 | <b>14</b>    | <b>DATA SAFETY MONITORING COMMITTEE.....</b>                        | <b>84</b> |
| 345 | <b>15</b>    | <b>REGULATORY AND ETHICAL OBLIGATIONS.....</b>                      | <b>85</b> |
| 346 | 15.1         | Declaration of Helsinki .....                                       | 85        |
| 347 | 15.2         | Informed Consent/Assent .....                                       | 85        |
| 348 | 15.3         | Institutional Review Board/Ethics Committee.....                    | 85        |
| 349 | 15.4         | Pre-Study Documentation Requirements .....                          | 86        |
| 350 | 15.5         | Patient Confidentiality.....                                        | 87        |
| 351 | <b>16</b>    | <b>ADMINISTRATIVE AND LEGAL OBLIGATIONS.....</b>                    | <b>88</b> |
| 352 | 16.1         | Protocol Amendments and End of Study or Termination .....           | 88        |
| 353 | 16.2         | Study Documentation and Storage .....                               | 88        |
| 354 | 16.3         | Study Monitoring and Data Collection.....                           | 89        |
| 355 | 16.4         | Electronic Data collected by Interactive Voice Response System..... | 91        |
| 356 | 16.5         | Quality Assurance .....                                             | 91        |
| 357 | 16.6         | Compensation.....                                                   | 91        |
| 358 | 16.7         | Publication Policy.....                                             | 92        |
| 359 | 16.8         | Intellectual Property Rights.....                                   | 92        |
| 360 | 16.9         | Confidential Information.....                                       | 93        |
| 361 | <b>17</b>    | <b>REFERENCES .....</b>                                             | <b>94</b> |
| 362 | Appendix 2.1 | Investigator Details.....                                           | 102       |
| 363 | Appendix 2.2 | Sponsor Contact Details .....                                       | 102       |

364

365

366

367

368

## Table of Appendices

|     |                                            |     |
|-----|--------------------------------------------|-----|
| 369 | APPENDIX 1. Schedule of Assessments .....  | 100 |
| 370 | APPENDIX 2. Study Personnel.....           | 102 |
| 371 | Appendix 2.1 Investigator Details.....     | 102 |
| 372 | Appendix 2.2 Sponsor Contact Details ..... | 102 |

373

374

375

376

377

### List of In-text Tables

|     |             |                                                                                                        |    |
|-----|-------------|--------------------------------------------------------------------------------------------------------|----|
| 378 | Table 5.1-1 | Formulation of GWP42003-P Oral Solution .....                                                          | 33 |
| 379 | Table 5.2-1 | Formulation of Placebo Oral Solution .....                                                             | 33 |
| 380 | Table 9.1-1 | Hematology, Biochemistry, Urinalysis and THC Screen .....                                              | 47 |
| 381 | Table 9.1-2 | Neuropsychological Protocol for Epilepsy Patients<br>Treated with Cannabidiol - Patient Measures ..... | 50 |
| 383 | Table 9.1-3 | Neuropsychological Protocol for Epilepsy Patients<br>Treated with Cannabidiol - Parent Measures .....  | 50 |
| 384 |             |                                                                                                        |    |

385  
386  
387  
388  
389  
390

### List of In-text Figures

391

392

Figure 1-1 Study Design and Treatment Schema ..... 12

393

Figure 9-1 Flow Diagram for Identifying and Evaluating Clinical  
394 Trial Adverse Event Data Through Systematic  
395 Categorization, Tabulation and Analysis which can  
396 Illuminate an Abuse Potential Signal (for Patients 12  
397 Years of Age and Older) ..... 58

398  
399  
400  
401  
402  
403

## List of Abbreviations

|         |                                                                                           |
|---------|-------------------------------------------------------------------------------------------|
| AE      | Adverse Event                                                                             |
| AEDs    | Antiepileptic drugs                                                                       |
| ALT     | Alanine aminotransferase                                                                  |
| AST     | Aspartate aminotransferase                                                                |
| CBD     | Cannabidiol                                                                               |
| CGIC    | Caregiver Global Impression of Change                                                     |
| CI      | Confidence Interval                                                                       |
| CIOMS   | Council for International Organizations of Medical Sciences                               |
| CRF     | Case Report Form                                                                          |
| CRO     | Contract Research Organization                                                            |
| C-SSRS  | Columbia-Suicide Severity Rating Scale                                                    |
| CWS     | Cannabis Withdrawal Scale                                                                 |
| DS      | Dravet syndrome                                                                           |
| DSMC    | Data Safety Monitoring Committee                                                          |
| EC      | Ethics Committee                                                                          |
| ECG     | 12-lead Electrocardiogram                                                                 |
| EDSS    | Epworth Daytime Sleepiness Scale                                                          |
| EEG     | Electroencephalogram                                                                      |
| EU      | European Union                                                                            |
| GCP     | Good Clinical Practice                                                                    |
| GW      | GW Research Ltd                                                                           |
| GWP     | GW Pharma Ltd                                                                             |
| IB      | Investigator Brochure                                                                     |
| ICH GCP | International Conference on Harmonization Tripartite Guideline for Good Clinical Practice |
| IMP     | Investigational Medicinal Product                                                         |
| IND     | Investigational New Drug                                                                  |
| INR     | International Normalized Ratio                                                            |
| IRB     | Institutional Review Board                                                                |
| ITT     | Intention to Treat                                                                        |
| IVRS    | Interactive Voice Response System                                                         |
| LOCF    | Last Observation Carried Forward                                                          |

404  
405  
406  
407  
408  
409  
410

|              |                                                      |
|--------------|------------------------------------------------------|
| MMRM         | Mixed-Effect Model Repeated Measures                 |
| 0–10 NRS     | 0–10 Numerical Rating Scale                          |
| OLE          | Open label extension                                 |
| PI           | Principal Investigator                               |
| PP           | Per Protocol                                         |
| PVD          | Pharmacovigilance Department                         |
| QOLCE        | Quality of Life in Childhood Epilepsy                |
| SAE          | Serious Adverse Event                                |
| SAP          | Statistical Analysis Plan                            |
| <i>SCN1A</i> | Voltage-gated sodium channel $\alpha$ 1 subunit gene |
| SMEI         | Severe Myoclonic Epilepsy in Infancy                 |
| SUSAR        | Suspected Unexpected Serious Adverse Reaction        |
| TBL          | Total Bilirubin                                      |
| THC          | $\Delta^9$ -tetrahydrocannabinol                     |
| ULN          | Upper limit of normal                                |
| Vineland-II  | Vineland Adaptive Behavior Scales, Second Edition    |
| VNS          | Vagus Nerve Stimulation                              |

411  
412  
413  
414  
415  
416  
417  
418

## Definition of Terms

| <b>Term</b>      | <b>Definition</b>                                                                                                                                                           |
|------------------|-----------------------------------------------------------------------------------------------------------------------------------------------------------------------------|
| Baseline         | The 28-day period from screening (Visit 1 [Day -28]) to randomization (Visit 2 [Day 1]).                                                                                    |
| Day 1            | The day a patient first receives investigational medicinal product or placebo.                                                                                              |
| End of treatment | Completion of the treatment period (Visit 8 [Day 99]) or withdrawal.                                                                                                        |
| End of study     | Completion of the Clinical Study Report.                                                                                                                                    |
| High Dose Level  | The maximum target dose of GWP42003-P as determined by the Data Safety Monitoring Committee of study GWEP1332 Part A (up to 20 mg/kg/day), or equivalent volume of placebo. |
| IMP              | Investigational Medicinal Product (Study Medication). Used to describe both investigational active product and reference therapy (placebo).                                 |
| INR              | International Normalized Ratio is a calculation made to standardize prothrombin time.                                                                                       |
| Investigator     | Study Principal Investigator or a formally delegated study physician.                                                                                                       |
| Low Dose Level   | 50% of the High Dose Level of GWP42003-P, or equivalent volume of placebo.                                                                                                  |



419  
420  
421  
422  
423  
424

## 2 OBJECTIVES

425

### 2.1 Primary

426

427

428

429

430

431

432

433

434

To assess the efficacy of GWP42003-P as an adjunctive antiepileptic treatment compared with placebo, with respect to the percentage change from baseline during the maintenance period of the study in convulsive seizure frequency. The dose response effect between two GWP42003-P Dose Levels and placebo will also be explored. Convulsive seizures are defined as tonic-clonic, tonic, clonic or atonic and non-convulsive seizures as myoclonic, partial or absence.

### 2.2 Secondary

435

436

437

438

439

440

441

442

- To assess changes from baseline in non-convulsive seizure frequency, usage of rescue medication, number of inpatient hospitalizations due to epilepsy, sleep disruption, daytime sleepiness, quality of life and conduct behavioral and cognitive assessments in patients taking GWP42003-P as an adjunctive treatment, when compared with placebo.
- To assess the safety of both GWP42003-P doses when compared with placebo.

443  
444  
445  
446  
447  
448

### 3 BACKGROUND AND RATIONALE

449

#### 3.1 Disease

450

451

452

453

454

455

456

457

458

459

460

461

462

463

464

465

466

467

468

469

470

Dravet syndrome (DS), also known as Severe Myoclonic Epilepsy in Infancy (SMEI), is a rare form of severe epilepsy with onset in early childhood. It has an incidence of less than one per 40,000 and accounts for 1.4% of epilepsies in children aged <15 years<sup>1, 2, 3</sup>. DS is characterized by a variety of treatment-resistant seizures (febrile and afebrile, generalized and unilateral, clonic or tonic-clonic) that occur in the first year of life and has a poor cognitive prognosis. Onset usually occurs between four and eight months of age and manifests typically as a prolonged (>15 min) clonic, generalized or unilateral convulsive seizure, often triggered by fever, that can evolve into status epilepticus<sup>4, 5, 6</sup>. After a typical period of two weeks to two months, further febrile seizures occur and afebrile seizures also appear. In addition to convulsive seizures, other seizure types appear between the ages of one and four years, including myoclonic seizures, focal seizures, atypical absences and obtundation statuses (in which consciousness is impaired). Significant developmental delay becomes apparent from the second year onwards and associated neuropsychological disturbances, such as attention deficit/hyperactivity disorder, are common. Beyond five years of age, convulsive seizures decrease but persist and occur mainly in sleep. Myoclonic and absence seizures tend to disappear and focal seizures either persist or decrease. Although psychomotor development and behavior tend to improve over time, cognitive impairment persists throughout the patient's lifetime<sup>4, 5, 6</sup>.

471

472

473

474

475

476

477

478

479

480

481

Myoclonic seizures are a defining characteristic of DS and can be massive, predominantly involving axial muscles, or erratic/segmental, which are mainly limited to the distal limbs and face. Massive myoclonic seizures are often associated with electroencephalogram (EEG) paroxysms and can be variable in intensity, with outcomes ranging from falling (drop attack) to causing only small, saccadic movements of the head, shoulders or trunk<sup>4, 5, 6</sup>. Erratic myoclonic seizures do not have an EEG correlate and are typically mild in intensity, although they can affect fine motor coordination. Some patients with DS experience both massive and erratic myoclonic seizures, yet these seizures can be absent in some DS patients. Such cases are defined as "borderline" SMEI and may have different EEG features to typical SMEI, although the course and outcome of the disease remain the same<sup>2, 6, 7</sup>.

482

483

484

Genetic analyses have revealed that more than 70% of patients with DS have mutations in the voltage-gated sodium channel  $\alpha 1$  subunit gene (*SCN1A*)<sup>8, 9, 10, 11, 12, 13</sup>. *SCN1A* encodes the pore-forming subunit of the Na<sub>v</sub>1.1 voltage-gated sodium

485  
486  
487  
488  
489  
490  
491  
492  
493  
494  
495  
496  
497  
498  
499  
500  
501  
502  
503  
504  
505  
506  
507  
508  
509  
510  
511  
512  
513  
514  
515  
516  
517  
518  
519  
520  
521  
522  
523  
524

channel and there are currently more than 700 published *SCN1A* mutations, 90% of which occur in DS patients<sup>14</sup>. Approximately two-thirds of these mutations give rise to truncations while the remaining third are missense mutations that are predicted to severely impair channel function<sup>6</sup>. In addition, intragenic and whole gene deletions of *SCN1A* as well as deletions within the 5' promoter sequence have also been identified in DS patients that are otherwise *SCN1A*-mutation-negative<sup>9, 10, 11, 12, 13</sup>. Most *SCN1A* mutations in DS patients arise *de novo*, although approximately 5% of cases involve inheritance of familial *SCN1A* mutations from a mildly affected parent<sup>15, 16, 17, 18</sup>. In familial cases of DS, the phenotype and severity of epilepsy can be clinically variable among family members carrying the same *SCN1A* mutation. This heterogeneity is proposed to be due to variable familial expression of *SCN1A* mutations, mediated either by *SCN1A* mosaicisms or by the genetic and environmental background<sup>19, 20, 21, 22</sup>. Candidate modifier genes currently include *SCN9A* (encoding the pore-forming subunit of the Na<sub>v</sub>1.7 voltage-gated sodium channel) and *CACNB4* (encoding the β4 auxiliary subunit of high-voltage activated calcium channels), variants of which have been found in DS patients with *SCN1A* mutations<sup>23, 24</sup>. Mouse models in which *SCN1A* is either mutated or knocked out have demonstrated that the α1 subunit is critical for the excitability and *in vivo* function of inhibitory hippocampal and cortical interneurons<sup>25, 26</sup>. Reduced firing of these inhibitory interneurons would compromise network inhibition and cause a hyperexcitable gain-of-function effect that may underlie the severe epilepsy seen in DS. Moreover, *SCN1A* mutant mice reproduce the characteristic temperature- and age-dependent seizures and EEG paroxysms observed in DS, although the phenotypic variability of DS patients with *SCN1A* mutations remains unexplained<sup>27</sup>.

More than 20% of patients with DS have no detectable mutations in *SCN1A* and it is possible that many of these patients harbor mutations in regulatory elements located outside coding regions. Familial and *de novo* mutations of *PCDH19* (encoding protocadherin 19) have been reported in a subset of *SCN1A*-mutation-negative DS patients and it is estimated that *PCDH19* mutations could account for 5% of all DS cases<sup>28, 29</sup>. Additional genes in which mutations cause DS include *GABRG2* (encoding the γ2 subunit of γ-aminobutyric acid -A receptors), *SCN1B* (encoding the β1 auxiliary subunit of voltage-gated sodium channels) and *SCN2A* (encoding the pore-forming subunit of the Na<sub>v</sub>1.2 voltage-gated sodium channel), although very few cases have been reported<sup>30, 31, 32</sup>.

525  
526  
527  
528  
529  
530

531 DS is one of the most pharmaco-resistant forms of epilepsy, with all seizure types  
532 extremely refractory to conventional antiepileptic drugs (AEDs), especially during the  
533 first several years. Sodium valproate is often used to prevent the initial recurrent  
534 convulsive febrile seizures and benzodiazepines (e.g., diazepam, midazolam,  
535 clonazepam or clobazam) are frequently co-administered to limit the duration of long-  
536 lasting seizures. In most cases however, the relief provided by these agents is  
537 insufficient<sup>33, 34</sup>. Certain AEDs can paradoxically worsen seizures in DS patients,  
538 namely lamotrigine, carbamazepine and vigabatrin, and the use of certain barbiturates  
539 at high doses is associated with a poor outcome<sup>35, 36, 37</sup>. Potassium bromide can be  
540 effective at controlling convulsive status epilepticus and was found to be the most  
541 efficacious AED in a Japanese cohort of DS patients<sup>38</sup>. A study of DS patients treated  
542 with potassium bromide as adjunctive therapy showed a reduction in seizures in 81%  
543 of patients in the first three months, with 30% becoming seizure-free<sup>39</sup>. However,  
544 this compound has no effect on focal and tonic seizures and any initial efficacy is  
545 often not maintained long-term<sup>34, 39</sup>.

546 To date, the only AED that has proved efficacious in the majority of DS patients in  
547 placebo-controlled, double-blind trials is stiripentol<sup>40, 41, 42</sup>. In these studies,  
548 stiripentol was administered as adjunctive therapy to sodium valproate and clobazam.  
549 At least two thirds of patients experienced a >50% reduction in seizure frequency in  
550 the stiripentol arms of these studies versus <10% of patients in the placebo arms<sup>40, 41</sup>.  
551 A subsequent meta-analysis of these studies showed that stiripentol reduced the  
552 overall seizure rate by 70%<sup>42</sup>. Both the frequency and duration of seizures remained  
553 significantly reduced at a median of 2.9 years follow-up, with the greatest efficacy  
554 observed in infants<sup>36</sup>. Both short-term and long-term benefits of stiripentol as  
555 adjunctive therapy have also been demonstrated in an open-label study of Japanese  
556 DS patients, with responder rates of 61% and 48% at six weeks and six months,  
557 respectively<sup>43</sup>. Stiripentol is generally well tolerated and can improve seizure control  
558 in DS patients receiving pharmacotherapy other than valproate and/or clobazam<sup>43, 44</sup>.

559 Topiramate and levetiracetam are two further AEDs that have undergone preliminary  
560 trials as adjunctive therapy in DS patients. In three open-label studies, more than half  
561 of patients receiving topiramate as add-on therapy achieved >50% reduction in  
562 seizure frequency, with 17% becoming seizure-free for at least four months in all  
563 cases<sup>45, 46, 47</sup>. Similar results were demonstrated in a single open-label trial of  
564 levetiracetam, with 64% of patients experiencing >50% reduction in tonic-clonic  
565 seizures at 12 weeks<sup>48</sup>. Although these new AEDs appear promising, larger

566  
567  
568  
569  
570  
571

randomized placebo-controlled studies are required to accurately assess their efficacy in the treatment of DS. Non-pharmacological treatments of DS that have demonstrated benefit as adjunctive therapy to AEDs include vagus nerve stimulation (VNS)<sup>49, 50</sup> and the introduction of a ketogenic diet<sup>51, 52, 53, 54</sup>. Despite the therapies listed above, DS remains one of the most pharmaco-resistant epilepsy syndromes. Consequently, there is a clear need for new, efficacious, pharmaceutical treatments.

577  
578  
579

### 3.2 GWP42003-P Background

580  
581

The cannabis plant (*Cannabis sativa* L.) produce trichomes that synthesize a large number of pharmacologically active compounds called phytocannabinoids. The most abundant of these are  $\Delta^9$ -tetrahydrocannabinol (THC) and cannabidiol (CBD), although the amounts and proportions of the various phytocannabinoids in each plant vary by strain and can be adjusted by breeding.

587  
588

The Investigational Medicinal Product (IMP), GWP42003-P, is formulated from extracts prepared from *Cannabis sativa* L. plants that have a defined chemical profile and contain consistent levels of CBD as the principal phytocannabinoid. Extracts from these plants are processed to yield pure (>95%) CBD that typically contains less than 0.5% (w/w) THC. The pure CBD is subsequently dissolved in excipients with added sweetener and flavoring.

593  
594

The pharmacological effects of phytocannabinoids are thought to be mediated primarily via their interaction with the endocannabinoid system, which consists of cannabinoid receptors, endogenous ligands (endocannabinoids) and enzymes for endocannabinoid synthesis and degradation. Two G-protein-coupled receptors for cannabinoids have so far been identified, designated cannabinoid CB<sub>1</sub> and CB<sub>2</sub> receptors. CBD does not bind to either of these receptors with any great affinity but does modulate the metabolizing enzymes of the endocannabinoid system. CBD also affects conduction of ion channels and acts on other G-protein-coupled receptors such as the transient receptor potential channel TRPV1<sup>55</sup> and the orphan receptor GPR55<sup>56</sup>. Importantly, CBD lacks detectable psychoactivity as found with THC. Further to this, CBD has demonstrated anticonvulsant, antipsychotic, anxiolytic, neuroprotective, antioxidant and anti-inflammatory activity<sup>57</sup>. Very little data concerning adverse events (AEs) of CBD in humans exists to date. However, doses of up to 1500 mg CBD per day are reported to be well tolerated in humans<sup>58</sup>.

605  
606

607  
608  
609  
610  
611  
612

### 3.3 Rationale

613  
614  
615  
616  
617  
618  
619  
620  
621  
622  
623

Given the limitations of current synthetic AEDs, it has been hypothesized that CBD can be tested for efficacy in children with pharmacoresistant epilepsy<sup>59</sup>. A recent parent survey has reported that 84% of children with treatment-resistant epilepsy experienced a reduction in seizures while taking CBD-enriched cannabis, with over half of those reporting >80% reduction in seizure frequency<sup>60</sup>. The majority of children had been diagnosed with DS, two thirds of which experienced  $\geq 50\%$  reduction in seizure frequency with one patient (8.3%) achieving complete seizure freedom. The CBD-enriched cannabis was behaviorally well tolerated and children often experienced improved sleep, increased alertness, and better mood.

624  
625  
626  
627  
628  
629  
630  
631  
632  
633  
634  
635

The primary objective of this study is to evaluate the efficacy of GWP42003-P as an adjunctive antiepileptic treatment compared with placebo, with respect to the percentage change from baseline during the maintenance period of the study in convulsive seizure frequency, in children and young adults with DS. The dose response effect between two GWP42003-P Dose Levels and placebo will also be explored. Additional objectives include evaluating changes from baseline in non-convulsive seizure frequency, usage of rescue medication, number of inpatient hospitalizations due to epilepsy, sleep disruption, daytime sleepiness, cognitive function, quality of life and adaptive behaviors in patients taking GWP42003-P in combination with AEDs compared with placebo. These endpoints are among those recommended by the European Medicines Agency guideline on clinical investigation of medicinal products in the treatment of epileptic disorders<sup>61</sup>.

636  
637  
638

#### 3.3.1 Selection of Study Dose

639  
640  
641  
642  
643

Doses up to 800 mg CBD per day for up to eight weeks have been well tolerated in adults in GW Research Ltd (GW) clinical study GWMD09112<sup>62</sup>, which, assuming an average weight of 70 kg, equates to 11.4 mg/kg. In the literature, doses of CBD have been given up to 1500 mg CBD per day for four weeks in adults<sup>58</sup>, which, in a 70 kg human, equates to a daily dose of 21.4 mg/kg CBD.

644  
645  
646  
647  
648  
649

GWP42003-P is currently being used by physicians for treatment of patients with intractable epilepsy resulting from a variety of etiologies in two open Individual Expanded Access Investigational New Drug (IND) studies and five open Intermediate Expanded Access IND studies. In the ongoing Individual Expanded Access IND studies, the initial dosing has been cautious (100 mg [morning] + 150 mg [afternoon/evening]), progressively increasing to 400 mg CBD/day; doses up to

650  
651  
652  
653  
654  
655

22 mg/kg per day have been well tolerated in an individual pediatric patient. The Sponsor is not aware of any safety issues arising from the dosing used in the Individual Expanded Access INDs. Treatment is expected to begin imminently in the Intermediate Expanded Access INDs. Based on the above, a daily maximum dose of 20 mg/kg CBD (given as two divided doses) was selected for the phase two/three study in patients with DS (GWEP1332). At the end of Part A of the GWEP1332 study a Data Safety Monitoring Committee (DSMC) will recommend the target dose and titration schedule for all subsequent studies, including this study (GWEP1424). The maximum dose patients can receive during the maintenance phase will be 20 mg/kg/day. During the maintenance phase, investigators may decrease the dose if a patient experiences intolerance. Patients whose dose has been decreased can have their dose increased again, if the tolerability improves.

668

### 3.4 Clinical Hypothesis

669  
670  
671  
672  
673  
674  
675

Pre-clinical studies have shown CBD to have anti-seizure and antiepileptic activity in a range of models. Anecdotal evidence and some literature reports<sup>60</sup> suggest that CBD is an effective AED in children with DS as discussed in [Section 3.3](#). The hypothesis underlying this study is that CBD has a positive risk/benefit outcome in the adjunctive treatment of DS.

676  
677  
678  
679  
680  
681

## 4 EXPERIMENTAL PLAN

683  
684  
685

### 4.1 Study Design

686  
687  
688  
689  
690  
691  
692  
693  
694  
695  
696  
697

This study is a 1:1:1 randomized, double-blind, 14-week comparison of two Dose Levels of GWP42003-P versus placebo (40 patients per treatment group). The treatment period will consist of a two-week titration period followed by a 12-week maintenance period. The treatment period will be followed by a 10-day taper period and a four-week follow-up period. The study will aim to determine the efficacy, safety and tolerability of two Dose Levels of GWP42003-P compared with placebo. The High Dose Level will be as recommended by the DSMC after assessment of safety and pharmacokinetic data from Part A of study GWEP1332. The Low Dose Level will be defined as 50% of the High Dose Level. Patients in the placebo group will be split into two equivalent cohorts; half receiving Low Dose Level dosing volumes and half receiving High Dose Level dosing volumes. The first patient will not enroll into this study until the DSMC has reviewed the safety data from Part A of study GWEP1332.

698  
699

Following study completion, all patients will be invited to continue to receive GWP42003-P in an open label extension (OLE) study (under a separate protocol).

700  
701  
702  
703

A study schema (Figure 1-1), presented at the end of [Section 1](#), depicts the overall study design. More detailed information on treatment and study procedures is provided in [Section 8](#) and [Section 9](#), respectively.

704  
705

#### 4.1.1 Primary Endpoint

706  
707  
708  
709

The primary endpoint is the mean percentage change from baseline in convulsive seizure frequency during the maintenance period (Day 15 to the end of the evaluable period) in patients taking GWP42003-P compared with placebo.

710  
711

#### 4.1.2 Secondary Endpoint(s)

712  
713

The following endpoints will be compared between the three treatment groups over the 12-week, double-blind maintenance period:

714  
715  
716  
717  
718

- Number of patients experiencing a >25% worsening, -25 to +25% no change, 25–50% improvement, 50–75% improvement or >75% improvement in convulsive seizures from baseline.
- Number of patients who are convulsive seizure free.
- Percentage changes from baseline in non-convulsive seizure frequency.



719  
720  
721  
722  
723  
724

- 725 • Change in types of seizures.
- 726 • Changes from baseline in usage of rescue medication.
- 727 • Changes from baseline in number of inpatient hospitalizations due to epilepsy.
- 728 • Changes from baseline in Sleep Disruption 0–10 Numerical Rating Scale (0–
- 729 10 NRS) score.
- 730 • Changes from baseline in Epworth Daytime Sleepiness Scale (EDSS) score.
- 731 • Changes from baseline in the Quality of Life in Childhood Epilepsy (QOLCE)
- 732 score.
- 733 • Change in cognitive function as measured with a cognitive assessment battery.
- 734 • Changes from baseline in the Vineland Adaptive Behavior Scales, Second
- 735 Edition (Vineland-II) score.
- 736 • Caregiver Global Impression of Change (CGIC).

737  
738  
739

The safety profile of GWP42003-P compared with placebo will also be the assessed at each Dose Level by measuring:

- 740 • AEs.
- 741 • Vital signs.
- 742 • Physical examination parameters.
- 743 • 12-lead Electrocardiogram (ECG).
- 744 • Laboratory parameters.
- 745 • Columbia-Suicide Severity Rating Scale (C-SSRS) score.
- 746 • Cannabis Withdrawal Scale (CWS) score.
- 747 • Abuse liability.

748

#### 749 **4.2 Number of Centers**

750

Approximately 30 centers are expected to participate in this study.

752

753

#### 754 **4.3 Number of Patients**

755

If patients fail screening they will be replaced until the target numbers of patients are achieved.

757

758

A total of 120 patients will be enrolled. The 120 patients will be randomly allocated to receive one of two Dose Levels of active IMP or placebo on a 1:1:1 basis (40 patients per treatment group).

759

760

761

The sample size calculation is explained fully in [Section 13.1](#).

762  
763  
764  
765  
766  
767

## 5 INVESTIGATIONAL MEDICINAL PRODUCT

768

Please refer to the separate Pharmacy Manual for more detailed information on the IMP.

769

770

771

### 5.1 GWP42003-P Oral Solution

772

773

774

GWP42003-P oral solution is presented as an oily solution containing 100 mg/mL CBD dissolved in the excipients sesame oil and anhydrous ethanol with added sweetener (sucralose) and strawberry flavoring (Table 5.1-1).

775

776

777

| <b>Table 5.1-1 Formulation of GWP42003-P Oral Solution</b> |                 |
|------------------------------------------------------------|-----------------|
| <b>Material</b>                                            | <b>Quantity</b> |
| CBD                                                        | 100 mg/mL       |
| Anhydrous ethanol                                          | 79 mg/mL        |
| Sucralose                                                  | 0.5 mg/mL       |
| Strawberry flavoring                                       | 0.2 mg/mL       |
| Sesame oil                                                 | make up to 1 mL |

778

### 5.2 Placebo Oral Solution

779

780

781

Placebo oral solution contains the excipients sesame oil and anhydrous ethanol with added sweetener (sucralose) and strawberry flavoring (Table 5.2-1).

782

783

| <b>Table 5.2-1 Formulation of Placebo Oral Solution</b> |                 |
|---------------------------------------------------------|-----------------|
| <b>Material</b>                                         | <b>Quantity</b> |
| Anhydrous ethanol                                       | 79 mg/mL        |
| Sucralose                                               | 0.5 mg/mL       |
| Strawberry flavoring                                    | 0.2 mg/mL       |
| Sesame oil                                              | make up to 1 mL |

784

### 5.3 Packaging, Storage and Drug Accountability

785

786

#### 5.3.1 Packaging and Labelling

787

788

789

The IMP will be manufactured and packaged by GW Pharma Ltd (GWP). It will be distributed by GWP or delegated contractors. The IMP will be presented in 100 mL amber glass bottles with child-resistant caps and packed in cartons. Sufficient IMP will be dispensed at each relevant visit considering the dose group and weight of each patient. A unique pack identification number will be used to identify each box and the medication it contains. The pack numbers will cross check with the batch numbers held at GWP and the IMP information held on the Interactive Voice Response System (IVRS). GWP will ensure that all IMP provided is fully labelled

790

791

792

793

794

795

796

797

798

799

800

797  
798  
799  
800  
801  
802

803 and packaged. Label text will comply with European Union (EU) guidance on Good  
804 Manufacturing Practice, Annex 13 Labelling. In addition, any local country  
805 requirements in accordance with local Drug Law or Regulatory Requirement will be  
806 included in the final label text.

807 Directions of use, name, address, telephone number of investigator or main contact  
808 for information about the product or the clinical trial will be provided separately to the  
809 patient.

810

### 811 **5.3.2 Storage**

812

813 The IMP must be stored upright at room temperature (<30°C) and must not be  
814 refrigerated or frozen. It must also be kept away from heat and direct sunlight.

815 The IMP must be stored in compliance with the local regulations for a controlled drug  
816 (if applicable to country). The sponsor must approve storage location and facilities.

817 Should storage conditions deviate from these specified requirements, the GW study  
818 monitor should be contacted immediately to confirm if the IMP remains suitable for  
819 use. IMP should be placed under quarantine until confirmation is received that IMP is  
820 suitable for use.

821 Temperature records of the storage location must be maintained on a daily basis (a  
822 minimum of Monday–Friday, excluding public holidays) from date of receipt of first  
823 shipment until end of study dispensing period at each site. These records must  
824 contain at least the minimum and maximum daily temperatures and should be made  
825 available to the appropriate GW personnel for review throughout the study.

826

### 827 **5.3.3 Supply and Return of Investigational Medicinal Product**

828

829 Once a site has been activated via the IVRS at study initiation, IMP will be shipped to  
830 a responsible person, such as the pharmacist, at the investigator's center, who will  
831 check the amount received (against the IVRS Shipment Request) and the condition of  
832 the drug. Details of the IMP received will be recorded in the IMP accountability  
833 record (see [Section 5.3.4](#)). The site will acknowledge IMP receipt via the IVRS and  
834 will complete any receipt forms required. IMP will be dispensed and returned as  
835 detailed in [Section 8.4](#) with further IMP shipments to be initiated by the IVRS. As  
836 directed, all supplies, including unused, partially used, or empty containers, will be  
837 returned to GWP or destroyed at the center if agreed in writing by the study monitor.

838  
839  
840  
841  
842  
843

#### 5.3.4 Investigational Medicinal Product Accountability

844  
845  
846  
847  
848

The investigator has overall responsibility for the accountability of all used and unused IMP. A drug accountability record for the IMPs must be kept current and should contain:

849  
850  
851  
852  
853

- The dates and quantities of IMP received from GWP.
- Patient's identification.
- Date and quantity of IMP dispensed.
- The initials of the dispenser.
- Date and quantity of IMP returned to the investigator/pharmacy.

854  
855  
856  
857

A record of returned IMP must be completed and included in the shipment of used and unused IMP to GWP. At the end of the study a record/statement of reconciliation must be completed and provided to GWP.

858  
859

These inventories must be made available for inspection by an authorized GW or GWP representative and local officials or regulatory agency inspectors.

860  
861

Please refer to the separate Pharmacy Manual for more detailed information on the IMP.

862  
863  
864  
865  
866  
867

## 6 PATIENT ELIGIBILITY

868  
869 Investigators will be required to maintain a log that includes limited information about  
870 all screened patients (initials, age, gender; as allowed per local regulations) and  
871 outcome of screening.

872

### 6.1 Inclusion Criteria

873

874

875

For inclusion in the study, patients must fulfil ALL of the following criteria:

876 **6.1.1** Patient and/or parent(s)/legal representative must be willing and able to  
877 give informed assent/consent for participation in the study (see  
878 [Section 15.2](#)).

879 **6.1.2** Patient and their caregiver must be willing and able (in the  
880 investigator's opinion) to comply with all study requirements.

881 **6.1.3** Patient must be male or female aged between two and 18 years  
882 (inclusive).

883 **6.1.4** Patient must have a documented history of DS which is not completely  
884 controlled by current AEDs.

885 **6.1.5** Patient must be experiencing **four or more** convulsive seizures (i.e.,  
886 tonic-clonic, tonic, clonic, atonic seizures) during the 28-day baseline  
887 observation period.

888 **6.1.6** Patient must be taking one or more AEDs at a dose which has/have been  
889 stable for at least four weeks.

890 **6.1.7** All medications or interventions for epilepsy (including ketogenic diet  
891 and VNS) must have been stable for four weeks prior to screening and  
892 patient and caregiver are willing to maintain a stable regimen  
893 throughout the study.

894 **6.1.8** Patient and/or parent(s)/legal representative is willing to allow his or her  
895 primary care practitioner and consultant to be notified of participation in  
896 the study.

897

### 6.2 Exclusion Criteria

898

899

900

The patient may not enter the study if ANY of the following apply:

901 **6.2.1** Patient has clinically significant unstable medical conditions other than  
902 epilepsy.

903 **6.2.2** Patient has had clinically relevant symptoms or a clinically significant  
904 illness in the four weeks prior to screening or randomization, other than  
905 epilepsy.

906 **6.2.3** Patient has clinically significant abnormal laboratory values, in the  
907 investigator's opinion, at screening or randomization.

908  
909  
910  
911  
912  
913

- 914           **6.2.4**    Patient has clinically relevant abnormalities in the ECG measured at  
915            screening or randomization.
- 916           **6.2.5**    Patient has any concurrent cardiovascular conditions which will, in the  
917            investigator's opinion, interfere with the ability to assess their ECGs.
- 918           **6.2.6**    Patient has a history or presence of alcohol or substance abuse within  
919            the last two years prior to the study or daily consumption of five or more  
920            alcohol-containing beverages.
- 921           **6.2.7**    Patient is currently using, or has in the past used, recreational or  
922            medicinal cannabis, or synthetic cannabinoid-based medications  
923            (including Sativex<sup>®</sup>) within the three months prior to study entry and is  
924            unwilling to abstain for the duration of the study.
- 925           **6.2.8**    Patient has a history of symptoms (e.g., dizziness, light-headedness,  
926            blurred vision, palpitations, weakness, syncope) related to a drop in  
927            blood pressure due to postural changes.
- 928           **6.2.9**    Patient has ingested alcohol in the 24-hour period prior to the first study  
929            visit and/or is unwilling to abstain from drinking alcohol throughout the  
930            treatment period.
- 931           **6.2.10**   Patient has any known or suspected hypersensitivity to cannabinoids or  
932            any of the excipients of the IMPs (e.g., sesame oil).
- 933           **6.2.11**   Female patient is of child bearing potential or male patient's partner is  
934            of child bearing potential; unless willing to ensure that they or their  
935            partner use effective contraception, for example oral contraception,  
936            double barrier, intra-uterine device, during the study and for three  
937            months thereafter (however a male condom should not be used in  
938            conjunction with a female condom).
- 939           **6.2.12**   Female patient is pregnant, lactating or planning pregnancy during the  
940            course of the study and for three months thereafter.
- 941           **6.2.13**   Patient has been part of a clinical trial involving another IMP in the  
942            previous six months.
- 943           **6.2.14**   Any other significant disease or disorder which, in the opinion of the  
944            investigator, may either put the patient at risk because of participation in  
945            the study, may influence the result of the study, or affect the patient's  
946            ability to participate in the study.
- 947           **6.2.15**   Patient has significantly impaired hepatic function at screening (Visit 1)  
948            or randomization (Visit 2) (Alanine aminotransferase [ALT]  $>5 \times$  upper  
949            limit of normal [ULN] or total bilirubin [TBL]  $>2 \times$  ULN) OR the ALT  
950            or Aspartate aminotransferase (AST)  $>3 \times$  ULN **and** (TBL  $>2 \times$  ULN  
951            **or** international normalized ratio [INR]  $>1.5$ ). *This criterion can only*  
952            *be confirmed once the laboratory results are available; patients*  
953            *randomized into the study who are later found not to meet this criterion*  
954            *should be withdrawn from the study.*
- 955           **6.2.16**   Following a physical examination the patient has any abnormalities that,  
956            in the opinion of the investigator, would prevent the patient from safe  
957            participation in the study.

- 958  
959  
960  
961  
962  
963
- 964       **6.2.17** Patient is unwilling to abstain from donation of blood during the study.
- 965       **6.2.18** There are plans for the patient to travel outside their country of  
966       residence during the study.
- 967       **6.2.19** Patient has previously been randomized into this study.
- 968       **6.2.20** Any history of suicidal behavior or any suicidal ideation of type four or  
969       five on the C-SSRS at screening.

970  
971  
972  
973  
974  
975

## 976 **7 PATIENT ENROLLMENT**

977 Before patients may be entered into the study, GW requires a copy of the relevant  
978 center's Ethical Committee (EC) or Institutional Review Board (IRB) written  
979 approval of the protocol, informed consent/assent forms and other patient information  
980 material. Patients will be considered enrolled in the study from the time of providing  
981 written informed consent/assent. All patients and/or parent(s)/legal representatives,  
982 where appropriate, must personally sign and date the consent/assent form prior to any  
983 procedures being performed (refer to [Section 9.1.1](#) and [Section 15.2](#)).

984

### 985 **7.1 Treatment Assignment**

986 At the start of Visit 1, a screening number will be assigned to each patient using an  
987 IVRS. After completion of assessments and confirmation of eligibility at Visit 2,  
988 patients will be assigned a unique patient number (to be used for the remaining  
989 duration of the study) and randomly allocated to one of two Dose Levels of  
990 GWP42003-P or placebo using the IVRS. GWP will provide all IMP in a packed and  
991 labelled state and the IVRS will identify the pack number to be dispensed to the  
992 patient at each visit, according to the treatment assigned in the randomization  
993 schedule.

994

### 995 **7.2 Randomization**

996 The allocation of IMP to treatment number will be done according to a randomization  
997 schedule produced by an independent statistician. The randomization schedule will be  
998 held centrally and not divulged to any other person involved in the study until the  
1000 database has been locked and unblinding authorized by the relevant GW personnel.  
1001



1002  
1003  
1004  
1005  
1006  
1007

## 8 TREATMENT PROCEDURES

1008

### 8.1 Investigational Medicinal Product Dosage, Administration and Schedule

1009  
1010  
1011

The IMP will be presented as an oral solution containing either the active pharmaceutical ingredient and excipients (in the case of GWP42003-P) or only excipients (in the case of placebo). For details regarding IMP formulations, see [Section 5](#).

1012  
1013  
1014  
1015

The IMP will consist of two types of medication:

1016

- GWP42003-P Oral Solution containing 100 mg/mL CBD.
- Placebo Oral Solution containing excipients.

1017  
1018  
1019

Patients will be assigned one of two Dose Levels of active IMP or placebo on a 1:1:1 basis (40 patients per treatment group). Patients in the placebo group will be split into two cohorts (20 receiving Low Dose Level dosing volumes and 20 receiving High Dose Level dosing volumes), but it is assumed that these two cohorts can be pooled for the analyses of efficacy. The High Dose Level will be determined by the DSMC of Part A of study GWEP1332. The maximum dose considered will be 20 mg/kg/day. The Low Dose Level will be defined as 50% of the High Dose Level.

1020  
1021  
1022  
1023  
1024  
1025  
1026  
1027

#### 8.1.1 Dose Administration

1028  
1029

The IMP will be administered orally by the patient or their caregiver twice each day (morning and evening) using the syringe(s) provided. The IMP will be swallowed and may be taken with other concomitant medications, as directed by the investigator.

1030  
1031  
1032  
1033

#### 8.1.2 Dose Escalation, Dose Adjustments and Down-Titration

1034  
1035

Titration regimens will be produced for the High Dose Level, Low Dose Level and placebo treatment groups. All patients will be weighed during Visit 2 and the daily volumes of IMP solution to be taken during the two-week titration period and for the remainder of the maintenance period will be calculated via the IVRS and the dosing regimen provided to the patient and/or caregiver. Further information on dispensing procedures will be provided in a separate Pharmacy Manual.

1036  
1037  
1038  
1039  
1040  
1041

Each patient will take their first dose of IMP at Visit 2 (Day 1) and their final maintenance dose of IMP at Visit 8 (Day 99). If an unacceptable AE develops at any time during the titration period, dosing should initially be suspended or amended, at the investigator's discretion, until the event has resolved. During the maintenance

1042  
1043  
1044  
1045

1046  
1047  
1048  
1049  
1050  
1051

period, patients should continue on a stable dosing regimen at the target Dose Level. If that dose becomes poorly tolerated, the investigator may consider temporarily or permanently reducing the dosage for the remainder of the maintenance period. However, where possible, the patient should be encouraged to return to the target Dose Level.

1057  
1058  
1059  
1060  
1061  
1062  
1063  
1064  
1065  
Patients who do not immediately enter the OLE study at Visit 8 or withdraw early will have their dose of IMP tapered gradually (10% each day) over a period of 10 days. However, the taper period may be interrupted if the patient wishes to enter the OLE study within seven days of Visit 8. Patients who require early termination prior to Visit 8 should also begin the taper period at the time the decision is made to discontinue (unless continued dosing is not possible due to an AE). Patients participating in the taper period will return used and unused IMP to the clinic at Visit 9.

## 1066 **8.2 Concomitant Therapy**

1067  
1068  
1069  
1070  
1071  
1072  
1073  
1074  
It is theoretically possible that GWP42003-P may modify the metabolism of other drugs (including AEDs) administered concurrently and there remains the possibility of pharmacological interactions between GWP42003-P and other concurrently administered drugs. Doses of any concomitant AEDs must have been stable for at least four weeks prior to screening and must remain stable throughout the study period. Further information on drug interactions can be found in the Investigator Brochure (IB)<sup>63</sup>.

1075  
1076  
The use of rescue medication is allowed when necessary. Any medication, other than the IMP, taken during the study must be recorded on the Case Report Form (CRF).

1077  
1078  
Any non-pharmacological therapies (e.g., ketogenic diet, VNS) must also be stable up to four weeks prior to screening and throughout the duration of the study.

1079

## 1080 **8.3 Prohibited Therapy During Study Period**

1081  
1082  
1083  
1084  
1085  
1086  
1087  
The following medications are prohibited for the duration of the study starting from acquisition of patient consent/assent. However, any patients taking these medications after screening should not be withdrawn from the study unless there are safety concerns. If applicable, the possible effects of these medications on the primary endpoint will be considered during the assessment of the evaluable period (see [Section 13.6.1](#)).

1088  
1089  
1090  
1091  
1092  
1093

- Any new medications or interventions for epilepsy (including ketogenic diet and VNS) or changes in dosage.
- Recreational or medicinal cannabis or synthetic cannabinoid based medications (including Sativex) within three months prior to or during the study.
- Any other IMP taken as part of a clinical trial within six months or during the study.

1102  
1103  
1104

#### **8.4 Compliance in Investigational Medicinal Product Administration**

The IMP is dispensed to the patient at each of the following visits:

1105  
1106  
1107  
1108  
1109  
1110

- Visit 2 (Day 1).
- Visit 4 (Day 29).
- Visit 6 (Day 57).
- Visit 8 (Day 99) (for patients not entering the OLE study on Day 99; if required).

1111  
1112  
1113  
1114  
1115  
1116  
1117

Patients or their caregivers will confirm the daily dose has been administered using the IVRS and record the total volume of IMP administered on each treatment day using the paper diary. Patients will be asked to return all IMP (used and unused) to each relevant visit (Visits 4, 6, 8 and 9). The site will check the returned IMP against the usage recorded using the IVRS report and diary. Any discrepancies will be discussed with the patient/caregiver and documented accordingly within the patient's source documents.

1118  
1119  
1120

The investigator must inform GW promptly of all missing or unaccountable IMP.

Refer to [Section 9.1.15.2.1](#) for the list of 'Triggering Drug Accountability Discrepancies' associated with monitoring of drug abuse liability.

1121  
1122  
1123

Records of IMP accountability will be maintained according to [Section 5.3.4](#).

1124  
1125

#### **8.5 Access to Blinded Treatment Assignment**

1126  
1127  
1128  
1129  
1130  
1131  
1132

The identity of IMP assigned to patients will be held by the IVRS. The principal investigator (PI) at each site, or his/her designee, is responsible for ensuring that information on how to access the IVRS for an individual patient is available to the relevant staff in case of an emergency and unblinding is required. A patient's treatment assignment should only be unblinded when knowledge of the treatment is essential to make a decision on the medical management of the patient. Unblinding for any other reason will be considered a protocol deviation.

1133  
1134  
1135  
1136  
1137  
1138

1139           The investigator is encouraged to contact GW to discuss the rationale for unblinding  
1140           prior to doing so. However, to prevent delays to the investigator or medical personnel  
1141           responding to a potentially emergent situation, unblinding of study medication will  
1142           not be dependent upon the investigator receiving approval from GW (i.e., the  
1143           investigator will be able to obtain the code break information independent of  
1144           contacting GW).

1145           If the investigator does unblind they must contact GW within one working day of the  
1146           event and must document the time, date and reason(s) for unblinding in the patient's  
1147           CRF.

1148  
1149  
1150  
1151  
1152  
1153

## 1154 **9 STUDY PROCEDURES**

1155 A list of the required study procedures is provided in the subsections that follow, refer  
1156 also to the Schedule of Assessments (APPENDIX 1). Assessments or tests that are  
1157 not done and examinations that are not conducted must be reported as such on the  
1158 CRFs.

1159 The location of the source data for the following procedures will be documented, per  
1160 center, in a signed ‘Source Data Verification’ plan, for further details see  
1161 [Section 16.2](#).

1162  
1163

### 1164 **9.1 Study Procedure Listing**

1165  
1166

1167 To be eligible for the study, the patient must have agreed that if they or their partner  
1168 are of child bearing potential they are willing to use effective contraception for the  
1169 duration of the study and for three months thereafter. A highly effective method of  
1170 birth control is defined as those which result in a low failure rate (i.e., less than 1%  
1171 per year) when used consistently and correctly such as implants, injectables,  
1172 combined oral contraceptives, some IUDs, sexual abstinence or vasectomized partner  
1173 (CPMP/ICH/286/95 mod)<sup>64</sup>. Abstinence, as referenced above, is only acceptable as  
1174 true abstinence: when this is in line with the preferred and usual lifestyle of the  
1175 patient; periodic abstinence (e.g., calendar, ovulation, symptothermal, post-ovulation  
1176 methods) and withdrawal are not acceptable methods of contraception.

1176

#### 1177 **9.1.1 Informed Consent/Assent**

1178  
1179

1180 The parent(s)/legal representative of minor patients must personally sign and date the  
1181 EC/IRB approved consent form before any study specific procedures are performed or  
1182 any patient related data is recorded for the study. In addition, in cases where the  
1183 patient possesses adequate understanding, assent will be taken along with  
1184 parent(s)/legal representative consent, using EC/IRB approved assent forms. Assent  
1185 is defined as the minor’s permission or affirmative agreement to participate in the  
1186 study. The explicit wish of a minor, who is capable of forming an opinion and  
1187 assessing the information provided, to refuse participation in, or to be withdrawn  
1188 from, the clinical trial at any time must be considered by the investigator.

1188 Adult patients with an adequate level of understanding must personally sign and date  
1189 the EC/IRB approved informed consent form before any study specific procedures are  
1190 performed or any patient related data are recorded for the study. For adult patients

1191  
1192  
1193  
1194  
1195  
1196

with an insufficient level of understanding of what is proposed, only parent(s)/legal representative consent will be sought.

1199  
1200  
1201

For patients who go from being a minor to an adult (as per the country or state's age-of-majority regulation) during the course of the study, a new informed consent will be signed if the participant possesses an adequate understanding to do so.

1202  
1203  
1204

GW requires a physician to be present for consent and assent and to also sign the consent and assent forms.

1205  
1206

### **9.1.2 Demographics**

1207  
1208  
1209

The following information will be obtained for each patient: date of birth, gender and ethnic origin.

1210  
1211

### **9.1.3 Medical History**

1212  
1213

Relevant, significant medical history (including seizure frequency over the last six months) will be obtained and is defined as any condition or disease that:

1214  
1215  
1216  
1217

- May affect the condition under study.
- Is ongoing on entry into the study.
- Has occurred within one year prior to screening (Visit 1).

1218  
1219  
1220  
1221  
1222

The mutation status (positive or negative for mutation) of the *SCN1A* gene will be determined through the patient's medical records. If the mutation status of *SCN1A* is unknown, *SCN1A* analysis will be carried out during the study analysis (a blood sample can be taken at any clinic visit).

1223  
1224

### **9.1.4 Inpatient Epilepsy-Related Hospitalizations**

1225  
1226  
1227  
1228

The number of inpatient hospitalizations that are, in the investigator's opinion, due to epilepsy will be recorded in the patient's CRF and through the Serious Adverse Events (SAE) reporting process.

1229  
1230

### **9.1.5 Concomitant Medication**

1231  
1232  
1233

Details of all current and recent medication (i.e., taken within the previous 14 days), including AEDs, will be recorded at each study visit. AEDs used during the study should be maintained at a stable dose. Any changes in concomitant medication during

1234  
1235  
1236  
1237  
1238  
1239

the study must be recorded in the CRF at study visits. Patients should stop taking any prohibited therapy prior to the screening visit, as defined in [Section 8.3](#).

1242

#### 1243 **9.1.6 Physical Examination**

1244

Physical examinations will include height and body weight measurements.

1246

1247

#### 1248 **9.1.7 Vital Signs**

1249

Vital sign measurements, taken in a sitting position at rest for five minutes, will be completed alongside the physical examination. Postural blood pressure should be measured after five minutes in supine position and, if possible, two minutes in standing position. Blood pressure must be recorded using the same arm throughout the study.

1255

#### 1256 **9.1.8 12-Lead Electrocardiogram**

1257

An ECG will be performed, after five minutes in a supine position. A physician must review the ECG and any abnormal findings considered to indicate significant medical history or AEs must be recorded appropriately in the CRF. Additional ECG measurements can be taken at any time during the study, if clinically indicated.

1262

#### 1263 **9.1.9 Clinical Laboratory Sampling**

1264

Laboratory tests will include hematology, biochemistry and urinalysis (provided urine can be obtained, with the exception of screening where a urine sample for THC screen must be obtained). Analysis of all clinical blood samples, pregnancy tests (using serum) and tests to detect the presence of THC will be conducted at a central clinical laboratory.

1270

Urine samples for biochemistry will be analyzed at the study center by use of a dipstick with any relevant findings being sent for further urinalysis at the central laboratory (urinalysis, microscopy, culture and sensitivity, as applicable). In cases where urine samples cannot be analyzed at site due to local regulations, a full set of urine samples should be sent to the central laboratory for analysis.

1275

The THC results will be reported back to the study site to permit confirmation of eligibility and to be used as a measure of study compliance (i.e., to confirm that the patient did not take cannabis during the course of the study).

1276

1277

1278  
1279  
1280  
1281  
1282  
1283  
1284  
1285  
1286  
1287  
1288

The investigator and study monitor will be provided with a list of the normal ranges used by the testing laboratory for all variables assayed during the study and a statement of accreditation (or similar) for the laboratory. Clinical laboratory sample parameters are detailed in Table 9.1-1.

| <b>Biochemistry (serum)</b>             | <b>Hematology (whole blood)</b>                    | <b>Urinalysis (urine)</b> | <b>Pregnancy Test (serum)</b> | <b>THC screen (urine)</b> |
|-----------------------------------------|----------------------------------------------------|---------------------------|-------------------------------|---------------------------|
| Alanine aminotransferase (ALT)          | Hematocrit                                         | Bilirubin                 |                               | THC                       |
| Albumin                                 | Hemoglobin                                         | Blood                     |                               |                           |
| Alkaline phosphatase                    | Mean cell volume                                   | Glucose                   |                               |                           |
| Aspartate aminotransferase (AST)        | Mean corpuscular hemoglobin                        | Ketones                   |                               |                           |
| Calcium                                 | Platelets                                          | Nitrites                  |                               |                           |
| Creatinine                              | Red blood cell count                               | pH                        |                               |                           |
| Estimates of glomerular filtration rate | White blood cell count with automated differential | Protein                   |                               |                           |
| Gamma-glutamyl transferase              |                                                    | Specific gravity          |                               |                           |
| Glucose                                 |                                                    | Urobilinogen              |                               |                           |
| HDL-cholesterol                         |                                                    |                           |                               |                           |
| Potassium                               |                                                    |                           |                               |                           |
| Prolactin                               |                                                    |                           |                               |                           |
| Prothrombin time (plasma)               |                                                    |                           |                               |                           |
| Sodium                                  |                                                    |                           |                               |                           |
| Total bilirubin (TBL)                   |                                                    |                           |                               |                           |
| Total protein                           |                                                    |                           |                               |                           |
| Urea                                    |                                                    |                           |                               |                           |

1289  
1290  
1291  
1292  
1293  
1294  
1295  
1296  
1297  
1298  
1299  
1300  
1301  
1302

Investigators at study sites will be notified of safety laboratory test results. All laboratory results will be reviewed and the reports signed by an investigator. Any results considered to be of clinical significance must be addressed and followed up as clinically appropriate. See [Section 12.3.1](#) for guidance on evaluation of potential drug induced liver injury. All laboratory results considered to represent an AE must be documented on the CRF.

Repeat samples will be taken, if required, for clinical follow-up or if the sample is lost or damaged. Any abnormal end of treatment clinical laboratory result of clinical significance must be repeated at regular intervals until it returns to normal, or until an investigator is satisfied that the abnormality is not related to the IMP and needs no further investigation.

Sample volume requirements and processing procedures will be detailed in a separate laboratory manual. The patient/caregiver must be advised that it may not be safe for the patient to undertake further blood tests within one month of any study-related



1303  
1304  
1305  
1306  
1307  
1308

blood draws and to inform the investigator if they suffered any blood loss during the one-month period leading up to a planned blood draw.

1311

### 9.1.10 Interactive Voice Response System

1312  
1313

The IVRS will be used to collect patient reported diary data (refer to [Section 9.1.12](#)), to assign patients to treatment groups and to provide treatment allocation information in the event of patient unblinding. The IVRS will also be used to manage IMP supply.

1314

1315

1316

1317

A member of the study team must contact the IVRS at each clinic visit in order to:

1318

1319

- Obtain a patient's screening number (Visit 1).
- Randomize a patient and obtain their patient number (Visit 2).
- Obtain dispensing information (Visits 2, 4, 6 and 8).
- Provide completion/taper/premature termination information (Visit 8 and 9).

1320

1321

1322

1323

Training will be given to all sites prior to the start of the study.

1324

1325

1326

### 9.1.11 Questionnaires and Assessments Completed at Scheduled Visits

1327

1328

1329

The same caregiver should complete/answer the questionnaires/assessments in order to maintain consistency. The C-SSRS is to be administered by the investigator or his/her qualified designee at every visit as indicated in the time and events table. (Qualified designee is defined as physician, osteopath, nurse practitioner, clinical psychologist or physician's assistant, who is licensed and has completed the C-SSRS training within the last 2 years). The survey should be administered by the same assessor, where possible, throughout the study.

1330

1331

1332

1333

1334

1335

1336

1337

#### 9.1.11.1 Sleep Disruption 0–10 Numerical Rating Scale

1338

The patient's caregiver will be asked:

1339

- “On a scale of ‘0 to 10’, please indicate the number that best describes your child's sleep disruption in the last week.”

1340

1341

1342

The markers range from 0 = slept extremely well, to 10 = unable to sleep at all.

1343

If the main caregiver is not available at the appropriate visit then this information can be captured over the telephone, ideally on the day of the visit or otherwise within three days.

1344

1345

1346

1347  
1348  
1349  
1350  
1351  
1352  
1353  
1354  
1355

### 9.1.11.2 Epworth Daytime Sleepiness Scale

1356 The EDSS is a questionnaire that provides a measure of a person's general level of  
1357 daytime sleepiness, or their average sleep propensity in daily life. The EDSS contains  
1358 eight questions that are rated on a four-point numerical scale (0–3). The total EDSS  
1359 score is the sum of the eight item-scores and can range between 0 and 24. Higher  
1360 total scores represent greater levels of daytime sleepiness.

1361 The EDSS will be completed by the patient's caregiver.

1362 If the main caregiver is not available at the appropriate visit then this information can  
1363 be captured over the telephone, ideally on the day of the visit or otherwise within  
1364 three days.

1365

### 9.1.11.3 Caregiver Global Impression of Change

1366 The CGIC comprises the following question to be rated on a seven-point scale:

- 1368 • Since your child started treatment, please assess the status of your child's  
1369 overall condition (comparing their condition now to their condition before  
1370 treatment) using the scale below.

1371

1372 The markers are: Very Much Improved; Much Improved; Slightly Improved; No  
1373 Change; Slightly Worse; Much Worse Very Much Worse.

1374 The caregiver will be asked to assess the status of the patient's overall condition at  
1375 Visit 2 (i.e., prior to commencement of IMP) as a memory aid for subsequent visits.

1376 If the main caregiver is not available at the appropriate visit then this information can  
1377 be captured over the telephone, ideally on the day of the visit or otherwise within  
1378 three days.

1379

### 9.1.11.4 Quality of Life in Childhood Epilepsy

1381 The QOLCE questionnaire was designed specifically to measure quality of life in  
1382 children with epilepsy and is composed of 16 subscales assessing seven domains of  
1383 Health Related Quality of Life (physical function, social function, emotional well-  
1384 being, cognition, behavior, general health and general quality of life). The QOLCE  
1385 must be completed by a parent or caregiver who interacts with the child on a  
1386 consistent, daily basis. It should take 20–30 minutes to complete.

1387  
1388  
1389  
1390  
1391  
1392

### 9.1.11.5 Cognitive Assessment Battery

1394  
1395  
1396  
1397  
1398  
1399  
1400  
1401  
1402  
1403  
1404

The cognitive assessment battery will be administered at Visit 2 before receiving study medication and repeated at Visit 8 or when the patient completes treatment. The items are age specific and the age of the patient at entry will be the age used when choosing the items to be given. Children and adults are to complete the battery as able. It is expected that a number of patients will only be able to complete part of the battery and some may not be able to complete it at all. Parent and/or caregivers are to complete certain items. The battery items are available in English, French, and Spanish (so will only be administered to a sub-group of countries: USA, UK, France and Spain) and need to be given by an experienced psychometrician. A summary of the battery is shown below in Table 9.1-2 and Table 9.1-3.

| <b>Function</b>                             | <b>Patient Measures</b>                                                                                                                                                 | <b>Age Range</b> | <b>Approximate Administration Time for Psychometrician</b> |
|---------------------------------------------|-------------------------------------------------------------------------------------------------------------------------------------------------------------------------|------------------|------------------------------------------------------------|
| Intelligence<br><b>IQ</b>                   | WPPSI-4 Vocabulary, Matrix Reasoning                                                                                                                                    | 2;6 - 5;11 years | 30 minutes                                                 |
|                                             | WASI-2 Vocabulary, Matrix Reasoning (Including Wechsler: 'Digit Span' subtest from WISC-4 and WAIS-4; 'Coding' subtest from WISC-4 & WAIS-4; 'Bug Search' from WPPSI-4) | 6 - adult        | 45 minutes                                                 |
| Attention/Exec Funct<br><b>Trail Making</b> | Trail Making Test D-KEFS                                                                                                                                                | 9 - adult        | 5 minutes                                                  |
| Language<br><b>Naming Fluency</b>           | Expressive One-Word Picture Vocabulary Test-4 <sup>th</sup> Ed                                                                                                          | 2 - adult        | 5 minutes                                                  |
|                                             | NEPSY-2 Word Generation                                                                                                                                                 | 2 - 5 years      | 5 minutes                                                  |
|                                             | F-A-S and Animals                                                                                                                                                       | 6 - adult        | 5 minutes                                                  |
| Visual-Spatial<br><b>VMI</b>                | Developmental Test of Visual Motor Integration-6                                                                                                                        | 2 - adult        | 5 minutes                                                  |
| Fine Motor Speed<br><b>Pegs</b>             | Purdue Pegboard                                                                                                                                                         | 4 - adult        | 5 minutes                                                  |

1405  
1406  
1407

| <b>Function</b> | <b>Parent Measures</b>                                               | <b>Age Range</b> | <b>Approximate Administration Time for Parents</b> |
|-----------------|----------------------------------------------------------------------|------------------|----------------------------------------------------|
| Executive       | Behavior Rating Inventory of Executive Function (Parent and Teacher) | 3 - 21 years     | 10 minutes                                         |
| Attention       | ADHD Checklist (Parent and Teacher)                                  | All ages         | 5 minutes                                          |
| Mood/Anxiety    | BASC-2                                                               | 3 - 21           | 20 minutes                                         |

1408  
1409  
1410  
1411  
1412  
1413  
1414

| <b>Table 9.1-3 Neuropsychological Protocol for Epilepsy Patients Treated with Cannabidiol - Parent Measures</b> |                                     |                  |                                                    |
|-----------------------------------------------------------------------------------------------------------------|-------------------------------------|------------------|----------------------------------------------------|
| <b>Function</b>                                                                                                 | <b>Parent Measures</b>              | <b>Age Range</b> | <b>Approximate Administration Time for Parents</b> |
|                                                                                                                 | (Parent and Teacher)                | years            |                                                    |
| Free-form report                                                                                                | Report Form<br>(Parent and Teacher) | All ages         | 5 minutes                                          |
| SES                                                                                                             | SES Scale                           | All ages         | 5 minutes (during first assessment only)           |

1415

#### **9.1.11.6 Vineland Adaptive Behavior Scales (Second Edition)**

1416

The Vineland-II is an individually administered instrument for assessing adaptive behaviors. Communication, Daily Living Skills, Socialization, and Motor Skills will be assessed by the caregiver using a rating scale.

1417

1418

1419

1420

#### **9.1.11.7 Columbia-Suicide Severity Rating Scale (Children's)**

1421

The definitions of behavioral suicidal events used in this scale are based on those used in the Columbia Suicide History Form. Questions are asked on suicidal behavior, suicidal ideation and intensity of ideation. At screening (Visit 1), questions will be in relation to lifetime experiences (Children's Baseline). Questioning at all subsequent visits will be in relation to the last assessment (Children's Since Last Visit).

1422

1423

1424

1425

1426

The C-SSRS is to be administered by the investigator or his/her qualified designee at every visit as indicated in the time and events table. (Qualified designee is defined as physician, osteopath, nurse practitioner, clinical psychologist or physician's assistant, who is licensed and has completed the C-SSRS training within the last 2 years). The survey should be administered by the same assessor, where possible, throughout the study. Assessments will be conducted only if patients are of an appropriate age (six years of age and older).

1427

1428

1429

1430

1431

1432

1433

1434

#### **9.1.11.8 Caregiver Impression of Investigational Medicinal Product Palatability**

1435

1436

The caregiver will be asked the following question to be rated on a five-point scale:

1437

- Overall, how acceptable did your child find the study medication?

1438

1439

The markers are: Liked it a lot; Liked it; Neither liked nor disliked it, Didn't like it, Didn't like it at all.

1440

1441  
1442  
1443  
1444  
1445  
1446

If the main caregiver is not available at the appropriate visit then this information can be captured over the telephone, ideally on the day of the visit or otherwise within three days.

1450

1451

#### **9.1.11.9 Cannabis Withdrawal Scale**

1452

The CWS is a 19-item scale with each item (withdrawal symptom) measured on a 0–10 NRS (0 = Not at all; 5 = Moderately; 10 = Extremely). The patient or their caregiver is asked to record the extent to which each withdrawal symptom was experienced in the last 24 hours and also to rate the negative impact on normal daily activities (i.e., two separate scores are recorded for each item using the same 0–10 NRS). Scores are summed over the 19 items for each measure. Assessments will be conducted only if patients are of an appropriate age (six years of age and older).

1453

1454

1455

1456

1457

1458

1459

1460

#### **9.1.12 Patient Diary**

1461

Seizure information and IMP dose administration data will be collected through an IVRS telephone diary completed daily throughout the study. The patient or their caregiver will also complete a paper diary daily to record daily IMP dosing volumes, usage of rescue medication, concomitant AEDs and AEs throughout the study.

1462

1463

1464

1465

1466

The number and type of convulsive and non-convulsive seizures as well as information on usage of rescue medication, concomitant AEDs and AEs will be collected each day from screening (Visit 1) until completion of dosing (Visit 8/9) or withdrawal. Information on IMP intake will also be recorded each day from randomization (Visit 2) until completion of dosing (Visit 8/9) or withdrawal.

1467

1468

1469

1470

1471

1472

#### **9.1.13 Investigational Medicinal Product Accountability**

1473

IMP will be dispensed at each of the following visits:

1474

1475

- Visit 2 (Day 1).
- Visit 4 (Day 29).
- Visit 6 (Day 57).
- Visit 8 (Day 99) (for patients not entering the OLE study on Day 99; if required).

1476

1477

1478

1479

1480

1481

Patients will be asked to return all IMP (used and unused) to each relevant visit (Visits 4, 6, 8 and 9). The site will check the returned IMP against the usage recorded

1482

1483  
1484  
1485  
1486  
1487  
1488

using the IVRS report and diary. Any discrepancies will be discussed with the patient/caregiver and documented accordingly within the patient's source documents.

1491 Refer to [Section 9.1.15.2.1](#) for the list of 'Triggering Drug Accountability  
1492 Discrepancies' associated with monitoring of drug abuse liability.

1493

#### 1494 **9.1.14 Adverse Events**

1495

1496 Any adverse changes in the patient's medical condition, following completion of the  
1497 consent/assent form by the patient, will be recorded on the CRF as AEs, questioning  
1498 the patient further if necessary. All AEs occurring during the study, whether or not  
1499 attributed to the IMP, observed by the investigator or reported by the patient will be  
1500 recorded in the CRF.

1501 SAEs must be reported to GW Pharmacovigilance Department (PVD) within 24 hours  
1502 of discovery or notification of the event, and recorded in the CRF.

1503 Refer to [Section 12](#) for definitions, procedures and further information.

1504 The number of inpatient hospitalizations that are, in the investigator's opinion, due to  
1505 epilepsy will be recorded in the patient's CRF and through the SAE reporting process.

1506 Refer to [Section 9.1.15.1.1](#) for the list of 'Triggering AEs of Interest' associated with  
1507 monitoring of drug abuse liability.

1508

#### 1509 **9.1.15 Monitoring of Drug Abuse Liability (for Patients 12 Years of 1510 Age and Older)**

1511

1512 There are two triggers that will require the investigator or study coordinator to discuss  
1513 abuse potential signals with the patient or their caregiver. These are either AEs of  
1514 interest that may be reported by the patient/caregiver, or drug accountability issues  
1515 regarding overuse of the IMP or missing bottles. Different questionnaires will be  
1516 completed by the site depending upon which trigger occurs (see Figure 9-1).

1517 Irrespective of the above, all patients/caregivers will be interviewed at their final  
1518 dosing visit (Visit 8/9) or withdrawal visit and a Study Medication Use and Behavior  
1519 Survey will be completed by the investigator or study coordinator. Investigators and  
1520 study coordinators will be provided with training on how to complete and perform the  
1521 processes outlined in this section. This training must be completed and documented  
1522 by the relevant site staff prior to implementation at site.

1523  
1524  
1525  
1526  
1527  
1528

### 9.1.15.1 Monitoring of Adverse Events

1529

AE information will be collected according to [Section 9.1.14](#).

1530  
1531

1532  
1533

#### 9.1.15.1.1 List of ‘Triggering Adverse Events of Interest’

1534

During the collection of AEs, if the patient reports an AE consistent with any of the following categories, then the investigator or study coordinator is required to complete an additional Supplemental Adverse Event Form and a Site Classification Form (investigator only) following further discussion of the event(s) with the patient or their caregiver. The categories are:

1535

1536

1537

1538

1539

- Euphoria or inappropriate elation.
- Inappropriate laughter or exhilaration.
- Mood changes.
- Drunk, high or intoxicated.
- Hallucinations (visual or auditory), dissociations, disorientation, agitation.
- Disturbance in cognition, memory, or attention.
- Drug abuse.
- Drug withdrawal or drug withdrawal syndrome.
- Addiction.
- Overdose.
- Misuse of IMP.
- Thoughts of suicide, attempted suicide or suicide.

1540

1541

1542

1543

1544

1545

1546

1547

1548

1549

1550

1551

1552

An AE that is consistent with the above categories will be known as a ‘triggering AE of interest’ for the purposes of this study.

1553

1554

1555

#### 9.1.15.1.2 Supplemental Adverse Event Form

1556

This form consists of 15 questions regarding the AE and use of IMP. It is completed as part of an interview with the patient/caregiver when a triggering AE of interest is reported. It is important that this is completed by a trained investigator or study coordinator with the patient/caregiver present. The answers on the Supplemental Adverse Event Form will then be transcribed into the patient’s CRF for the study. If the Supplemental Adverse Event Form cannot be completed at the time the triggering AE of interest is reported, then the site should contact the patient/caregiver to obtain the required answers as soon as possible.

1557

1558

1559

1560

1561

1562

1563

1564  
1565  
1566  
1567  
1568  
1569

### 9.1.15.2 Monitoring Drug Accountability Discrepancies

1571 Any time after enrollment until final collection of study data, drug accountability  
1572 discrepancies are monitored as follows:

- 1573 • At routine Drug Accountability collection times (i.e., Visits 2, 4, 6 and 8):  
1574 the site personnel will collect the IMP clinical supplies and make sure the  
1575 usage is in line with the expectations reported within the IVRS report and  
1576 paper diary.
  - 1577 • At any time that the site is informed by either the IVRS or by the  
1578 patient/caregiver about any overuse of IMP, suspected misuse, abuse, or  
1579 diversion.
- 1580

#### 9.1.15.2.1 List of 'Triggering Drug Accountability Discrepancies'

1581 If there are any discrepancies in drug accountability as outlined by the criteria below,  
1582 known as 'triggering drug accountability discrepancies', then the trained investigator  
1583 or study coordinator will complete a Supplemental Drug Accountability Form and  
1584 Site Classification Form (investigator only) following further discussion of the  
1585 event(s) with the patient/caregiver. The triggering drug accountability discrepancies  
1586 are as follows:  
1587

- 1588 • Missing bottle(s).
  - 1589 • Compliance issues where one or more bottles are used compared to what was  
1590 the expected use, according to the IVRS report and paper diary.
  - 1591 • Returned IMP supply with evidence of tampering.
  - 1592 • Greater than the target daily dose as recorded in the IVRS report and paper  
1593 diary.
- 1594

#### 9.1.15.2.2 Supplemental Drug Accountability Form

1595 This form consists of eight questions regarding various aspects of drug accountability  
1596 and patient usage. It is completed as part of an interview with the patient/caregiver  
1597 when a triggering drug accountability discrepancy is identified. It is important that  
1598 this is completed by a trained investigator or study coordinator with the  
1599 patient/caregiver present. The answers on the Supplemental Drug Accountability  
1600 Form will then be transcribed into the patient's CRF for the study. The accountability  
1601 reporting procedures will still occur. If the Supplemental Drug Accountability Form  
1602 cannot be completed at the time the triggering drug accountability discrepancy is  
1603 identified, then the site should contact the patient/caregiver by telephone to obtain the  
1604 required answers as soon as possible. (Note: IMP refers to GWP42003-P or placebo,  
1605 not other concomitant medications).  
1606



1607  
1608  
1609  
1610  
1611  
1612  
1613  
1614  
1615

### **9.1.15.3 Site Classification Form**

1616 The investigator should review the applicable Supplemental Adverse Event Form or  
1617 Supplemental Drug Accountability Form, and then complete the Site Classification  
1618 Form. For each Supplemental Adverse Event Form or Supplemental Drug  
1619 Accountability Form completed, there should be an associated Site Classification  
1620 Form.

1621 The Site Classification Form requires the investigator to assign the finding to an  
1622 appropriate classification and then to also assign the possible relationship to the IMP.  
1623 The investigator is also required to indicate the level of the certainty of the  
1624 classification. The answers from the Site Classification Form will then be transcribed  
1625 into the patient's CRF for the study.

1626

### **9.1.15.4 Study Medication Use and Behavior Survey**

1627 This form consists of 18 questions regarding the use of the IMP. The trained  
1628 investigator or study coordinator will complete this survey as an interview with the  
1629 patient/caregiver at the final dosing visit (Visit 8/9) or withdrawal visit. The answers  
1630 on the Study Medication Use and Behavior Survey will then be transcribed into the  
1631 patient's CRF for the study.

1632 The Study Medication Use and Behavior Survey will be completed for all patients 12  
1633 years of age and older in the study and not only those that have reported a triggering  
1634 AE or drug accountability discrepancy.

1635

### **9.1.15.5 Adjudication Committee: Assessment of Abuse Potential of GWP42003-P**

1637 Any triggering AE or triggering drug accountability must be notified to the GW PVD  
1638 using the same fax number for SAE reporting within 24 hours of becoming aware of  
1639 the event.

1640 A formal Adjudication Committee will be appointed and assigned to this initiative to  
1641 classify triggered cases. The Adjudication Committee will meet on a periodic basis to  
1642 review and assess all of the information collected on triggered cases. Only data from  
1643 patients who have completed the study will be assessed.

1644 A detailed charter will be agreed, which will describe the roles, responsibilities and  
1645 duties of the members of Adjudication Committee. The Committee will review all of  
1646  
1647

1648  
1649  
1650  
1651  
1652  
1653

1654 the information collected in the process and in the assessment of the abuse potential of  
1655 GWP42003-P, such as:

- 1656 • All triggering AE information.
- 1657 • Supplemental Adverse Event Form (if applicable).
- 1658 • All triggering drug accountability discrepancies.
- 1659 • Supplemental Drug Accountability Form (if applicable).
- 1660 • Site Classification Form.
- 1661 • Study Medication Use and Behavioral Survey.
- 1662 • Additional information from site(s) as requested by the Committee.

1663

1664 The Adjudication Committee will assess all of the information. It will form a position  
1665 on the classification of each event and will write a study-related report, detailing the  
1666 conclusions and recommendations.

1667

The overall process is summarized in Figure 9-1.

1668  
1669  
1670  
1671  
1672  
1673  
  
1674  
1675  
1676  
1677  
1678  
1679

**Figure 9-1**                      **Flow Diagram for Identifying and Evaluating Clinical Trial Adverse Event Data Through Systematic Categorization, Tabulation and Analysis which can Illuminate an Abuse Potential Signal (for Patients 12 Years of Age and Older)**

1680  
1681  
1682  
1683  
1684  
1685  
1686  
1687  
1688  
1689  
1690  
1691  
1692  
1693  
1694  
1695  
1696  
1697  
1698  
1699  
1700  
1701  
1702  
1703  
1704  
1705  
1706

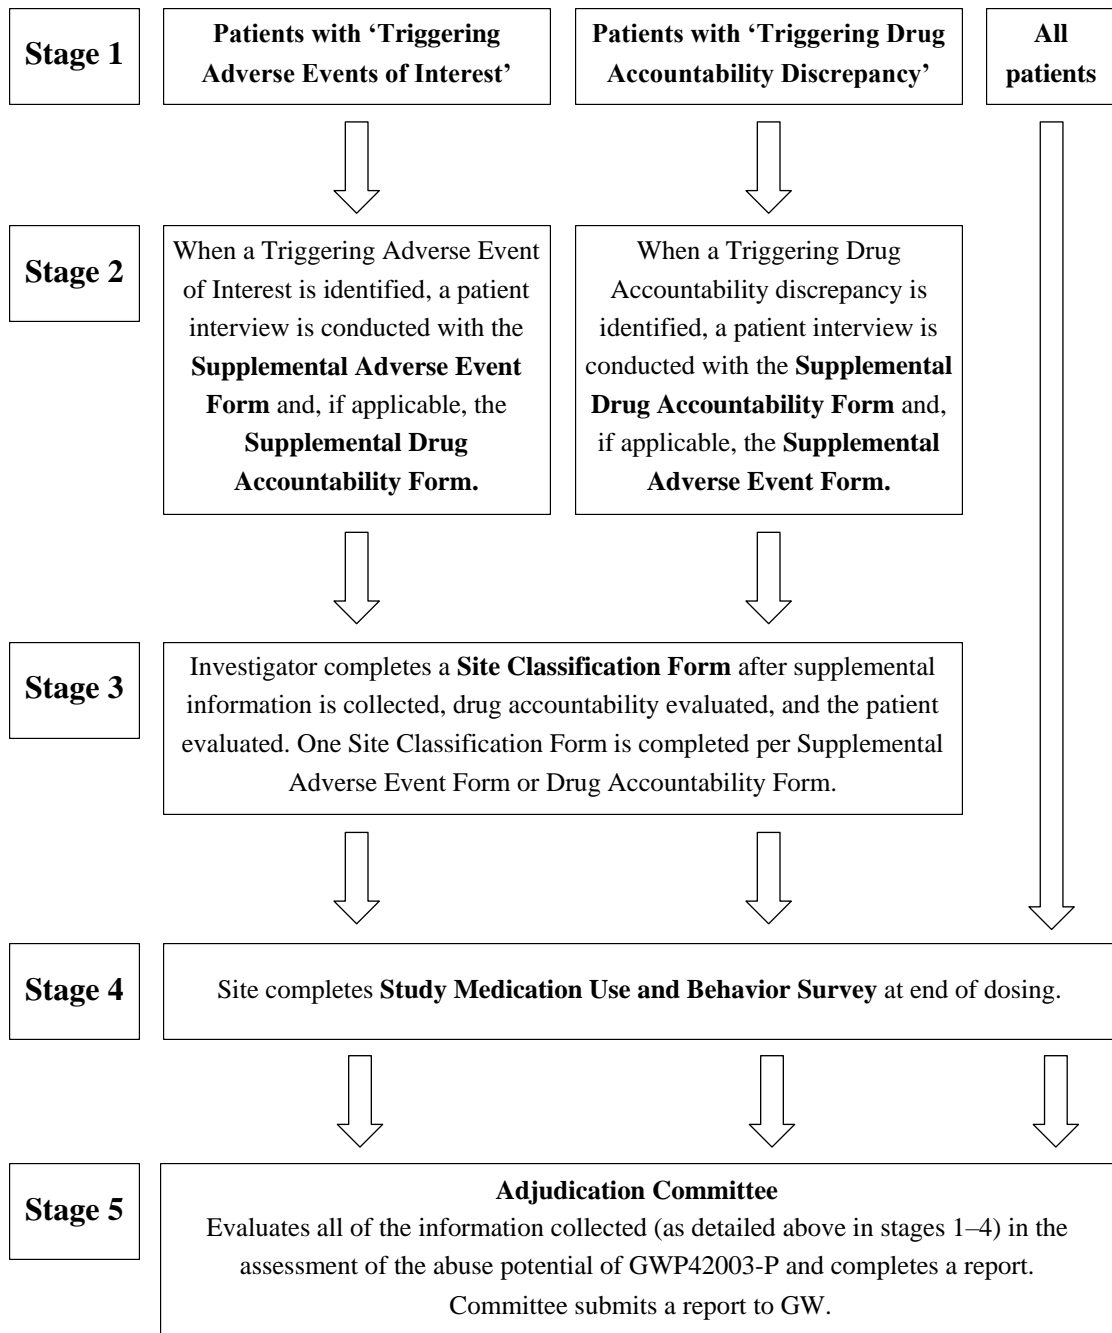

1707  
1708  
  
1710

1711  
1712  
1713  
1714  
1715  
1716

## 9.2 Study Procedures by Visit

1717  
1718  
1719  
1720  
1721  
1722  
1723  
1724  
1725

Patients and their parent(s)/legal representative will be invited to participate in the study and will be issued with the patient information and informed assent or the patient/parent(s)/legal representative information and informed consent (as applicable). Following adequate time to discuss the study with the investigator, nurse, relatives or caregiver, patients/parent(s)/legal representatives who provide written informed consent/assent at Visit 1 will be enrolled into the study.

1726  
1727

### 9.2.1 Visit 1 (Day -28, Screening)

1728  
1729  
1730  
1731  
1732  
1733  
1734  
1735  
1736  
1737  
1738  
1739

The following assessments will be made at Visit 1: demographics, medical history (including seizure frequency over the last six months and *SCN1A* mutation status), vital signs, postural blood pressure, physical examination (including height and body weight), ECG, C-SSRS (Children's Baseline) and visit procedure-related AEs. If the mutation status of *SCN1A* is unknown, a blood sample will be taken for *SCN1A* analysis (this can be taken at any visit during the study). Clinical laboratory samples (urine and blood) will be taken for hematology, biochemistry, urinalysis (where possible), a urine THC screen (required) and a pregnancy test (using a serum sample, as appropriate). Patients or their caregivers will also be asked for information regarding concomitant medications and/or changes to medication (including AEDs). Patients who satisfy all inclusion and none of the exclusion criteria specified in [Section 6](#) will then begin the 28-day baseline observation period.

1740  
1741  
1742

The IVRS must be contacted by the site to register the screening visit and issue the screening number. If this does not occur, the patient will not be able to call into the telephone diary.

1743  
1744  
1745  
1746

Patients or their caregivers will be issued with the IVRS details and will be instructed on how to use it to record daily seizure information. Patients or their caregivers will also be given a paper diary to record usage of rescue medication, concomitant AEDs and AEs and will be instructed on how to do so.

1747  
1748  
1749

The investigator should review the laboratory results as soon as these become available. If the results show a patient is ineligible, the patient must be withdrawn from the study.

1750  
1751  
1752  
1753  
1754  
1755

### 9.2.2 Visit 2 (Day 1, Randomization)

1756  
1757  
1758  
1759  
1760

This visit will occur 28 days after Visit 1. A visit window of  $\pm 3$  days from the scheduled visit date is permitted, but it is preferred that the visit is performed on the scheduled visit day where possible.

1761  
1762  
1763  
1764  
1765  
1766  
1767  
1768

The following assessments will be made at Visit 2: vital signs, postural blood pressure, physical examination (including height and body weight) and ECG. Clinical laboratory samples (blood and urine [where possible]) will be taken for hematology, biochemistry, urinalysis, a urine THC screen and a pregnancy test (using a serum sample, as appropriate). The patient's IVRS report and paper diary will be reviewed and the information recorded along with information regarding AEs, epilepsy-related hospitalizations, concomitant medications and/or changes to medication (including AEDs).

1769  
1770  
1771  
1772  
1773  
1774  
1775

The investigator must assess the patient's daily number of convulsive seizures from the patient's IVRS data. Patients who have experienced four or more convulsive seizures (i.e., tonic-clonic, tonic, clonic, atonic seizures) during the baseline period and who meet all of the other inclusion and none of the exclusion criteria specified in [Section 6](#) will be eligible to continue in the study. If a patient does not meet the eligibility criteria within this period, consideration will be given to rescreen at a later date.

1776  
1777  
1778  
1779

Eligible patients will then be randomized to receive one of two Dose Levels of GWP42003-P or placebo using the IVRS (see [Section 7.1](#)). Patients in the placebo group will be split into two equivalent cohorts: half receiving Low Dose Level dosing volumes and half receiving High Dose Level dosing volumes.

1780  
1781  
1782  
1783  
1784  
1785  
1786  
1787  
1788  
1789  
1790

Following randomization, patients will remain at the clinic where the following assessments will be performed prior to the administration of study medication: EDSS, Sleep Disruption 0–10 NRS, QOLCE, C-SSRS (Children's Since Last Visit), cognitive assessment battery, CWS and the Vineland-II. Caregivers will be asked to write a brief description of the patient's overall condition as a memory aid for the CGIC at subsequent visits or withdrawal. Patients will then receive sufficient IMP and a dosing regimen as assigned by the IVRS for the following four weeks. Each patient will take their first dose of IMP at the clinic and will titrate to their target Dose Level during the following two weeks. Patients or their caregivers will be instructed on using the IVRS's daily dosing record, as well as how to record IMP dosing information in the paper diary.

1791  
1792  
1793  
1794  
1795  
1796

The investigator should review the laboratory results as soon as these become available. If the results show a patient is ineligible, the patient must be withdrawn from the study.

1800

### 9.2.3 Visit 3 (Day 15)

1801  
1802  
1803  
1804  
1805

This visit will occur 14 days after randomization (Visit 2). A visit window of  $\pm 3$  days from the scheduled visit date is permitted, but it is preferred that the visit is performed on the scheduled visit day where possible.

1806  
1807  
1808  
1809  
1810  
1811  
1812  
1813  
1814  
1815

The following assessments will be made at Visit 3: vital signs, physical examination (including height and body weight), ECG, EDSS, Sleep Disruption 0–10 NRS, CGIC, C-SSRS (Children’s Since Last Visit) and the Vineland-II. Clinical laboratory samples (blood and urine [where possible]) will be taken for hematology, biochemistry and urinalysis. The patient’s IVRS report and paper diary will be reviewed and the information recorded along with information regarding AEs, epilepsy-related hospitalizations, concomitant medications and/or changes to medication (including AEDs). The investigator must assess adherence to the titration regimen.

1816  
1817

### 9.2.4 Visit 4 (Day 29)

1818  
1819  
1820

This visit will occur 28 days after randomization (Visit 2). A visit window of  $\pm 3$  days from the scheduled visit date is permitted, but it is preferred that the visit is performed on the scheduled visit day where possible.

1821  
1822  
1823  
1824  
1825  
1826  
1827  
1828  
1829

The following assessments will be made at Visit 4: vital signs, physical examination (including height and body weight), ECG, EDSS, Sleep Disruption 0–10 NRS, CGIC, C-SSRS (Children’s Since Last Visit) and the Vineland-II. Clinical laboratory samples (blood and urine [where possible]) will be taken for hematology, biochemistry and urinalysis. The patient’s IVRS report and paper diary will be reviewed and the information recorded along with information regarding AEs, epilepsy-related hospitalizations, concomitant medications and/or changes to medication (including AEDs). The investigator must assess adherence to the dosing regimen.

1830  
1831  
1832  
1833

All IMP (used and unused) will be collected and a check of the returned IMP against usage should be made. The IVRS will be contacted for treatment pack assignment. Patients will receive sufficient IMP as assigned by the IVRS for the following four weeks.

1834  
1835  
1836  
1837  
1838  
1839

### **9.2.5 Visit 5 (Day 43, Safety Telephone Call)**

1840  
1841  
1842  
1843  
1844

This visit will occur 42 days after randomization (Visit 2). A visit window of  $\pm 3$  days from the scheduled visit date is permitted, but it is preferred that the visit is performed on the scheduled visit day where possible.

1845  
1846  
1847  
1848

Visit 5 will be completed by telephone. Patients or their caregivers will be asked for information on AEs, epilepsy-related hospitalizations, concomitant medications and/or changes to medication (including AEDs).

1849  
1850

### **9.2.6 Visit 6 (Day 57)**

1851  
1852  
1853

This visit will occur 56 days after randomization (Visit 2). A visit window of  $\pm 3$  days from the scheduled visit date is permitted, but it is preferred that the visit is performed on the scheduled visit day where possible.

1854  
1855  
1856  
1857  
1858  
1859  
1860  
1861  
1862

The following assessments will be made at Visit 6: vital signs, physical examination (including height and body weight), ECG, EDSS, Sleep Disruption 0–10 NRS, CGIC, C-SSRS (Children's Since Last Visit) and the Vineland-II. Clinical laboratory samples (blood and urine [where possible]) will be taken for hematology, biochemistry and urinalysis. The patient's IVRS report and paper diary will be reviewed and the information recorded along with information regarding AEs, epilepsy-related hospitalizations, concomitant medications and/or changes to medication (including AEDs). The investigator must assess adherence to the dosing regimen.

1863  
1864  
1865  
1866  
1867

All IMP (used and unused) will be collected and a check of the returned IMP against usage should be made. The IVRS will be contacted for treatment pack assignment. Patients will receive sufficient IMP as assigned by the IVRS for the following six weeks.

1868  
1869

### **9.2.7 Visit 7 (Day 71, Safety Telephone Call)**

1870  
1871  
1872

This visit will occur 70 days after randomization (Visit 2). A visit window of  $\pm 3$  days from the scheduled visit date is permitted, but it is preferred that the visit is performed on the scheduled visit day where possible.

1873  
1874  
1875

Visit 7 will be completed by telephone. Patients or their caregivers will be asked for information on AEs, epilepsy-related hospitalizations, concomitant medications and/or changes to medication (including AEDs).

1876  
1877  
1878  
1879  
1880  
1881

### 9.2.8 Visit 8 (Day 99, End of Treatment)

1882  
1883  
1884  
1885  
1886  
1887

This visit will occur 98 days after randomization (Visit 2) or earlier if the patient withdraws from the study. A visit window of  $\pm 3$  days from the scheduled visit date is permitted, but it is preferred that the visit is performed on the scheduled visit day where possible.

1888  
1889  
1890  
1891  
1892  
1893  
1894  
1895  
1896  
1897  
1898

The following assessments will be made at Visit 8: vital signs, physical examination (including height and body weight), ECG, EDSS, Sleep Disruption 0–10 NRS, CGIC, QOLCE, C-SSRS (Children’s Since Last Visit), cognitive assessment battery and the Vineland-II. The Caregiver Impression of IMP Palatability will also be assessed. Clinical laboratory samples (blood and urine [where possible]) will be taken for hematology, biochemistry, urinalysis, a urine THC screen (required) and a pregnancy test (using a serum sample, as appropriate). The patient’s IVRS report and paper diary will be reviewed and the information recorded along with information regarding AEs, epilepsy-related hospitalizations, concomitant medications and/or changes to medication (including AEDs). The investigator must assess adherence to the dosing regimen.

1899  
1900  
1901

All IMP (used and unused) will be collected and a check of the returned IMP against usage should be made. For patients who withdraw early, the IVRS will be contacted to confirm withdrawal from the study.

1902  
1903  
1904

Patients who have completed all of the scheduled study visits will be offered the option of entering an OLE study. Entry is to be on the same day as Visit 8 (Day 99) or within seven days of Visit 8.

1905  
1906  
1907  
1908  
1909

For patients who enter the OLE study on Day 99, the IVRS will be contacted to confirm the patient’s completion of this study and the paper diaries will be collected. For patients 12 years of age and older, the trained investigator or study coordinator will complete the Study Medication Use and Behavior Survey as an interview with the patient/caregiver.

1910  
1911  
1912  
1913  
1914  
1915

For patients not entering the OLE study on Day 99, the IVRS will be contacted to confirm start of the 10-day taper period and for additional treatment pack assignment (if required). The IVRS will generate the patient’s daily IMP dosing volumes for the 10-day taper period, during which time IVRS and diary information will continue to be recorded. The taper period may be interrupted if the patient wishes to enter the OLE study within the seven-day timeframe.



1916  
1917  
1918  
1919  
1920  
1921

### 9.2.9 Visit 9 (Day 100–106 or Day 109, End of Taper Period)

1922  
1923  
1924  
1925  
1926  
1927  
1928  
1929

This visit is required only for those patients who do not enter the OLE study on the day of Visit 8 (i.e., Day 99±3) or for those who withdraw early. For patients who do not enter the OLE study, Visit 9 should occur 10 (+3) days after Visit 8 (i.e., on Day 109). For patients who delay entry into the OLE study, Visit 9 should occur on the day the patient enters the OLE study and within seven days of Visit 8 (i.e., up to Day 106) to allow the patient to enter the OLE study within this timeframe.

1930  
1931  
1932  
1933  
1934  
1935  
1936

The following assessments will be made at Visit 9: vital signs, physical examination (including height and body weight) and C-SSRS (Children's Since Last Visit). The CWS will also be assessed. The patient's IVRS report and paper diary will be reviewed and the information recorded along with information regarding AEs, epilepsy-related hospitalizations, concomitant medications and/or changes to medication (including AEDs). The investigator must assess adherence to the down-titration regimen.

1937  
1938  
1939  
1940  
1941  
1942

All IMP (used and unused) will be collected and a check of the returned IMP against usage should be made. The IVRS will be contacted to confirm the patient's completion of the study and the paper diaries will be collected. For patients 12 years of age and older, the trained investigator or study coordinator will complete the Study Medication Use and Behavior Survey as an interview with the patient/caregiver.

1943  
1944

### 9.2.10 Visit 10 (Day 137, Safety Follow-Up)

1945  
1946  
1947

This visit is required for patients who do not enter the OLE study or who withdraw from the study early. This visit should occur four weeks after Visit 9 (±3 days), or withdrawal from treatment, and can be conducted by telephone.

1948  
1949  
1950  
1951

The purpose of the follow-up is to ascertain the status of AEs continuing after Visit 9 or any new AEs commencing after Visit 9. Epilepsy-related hospitalizations, concomitant medications and/or changes to medication (including AEDs) must also be recorded.

1952  
1953  
1954  
1955  
1956

All causally related AEs that result in a patient's premature termination from the study or are present at the end of the study, should be followed up until a satisfactory resolution occurs, that is, until the AE resolves or is considered clinically insignificant, or until an investigator is satisfied that the AE is not related to IMP and needs no further investigation.

1957  
1958  
1959  
1960  
1961  
1962

### 9.2.11 Safety Telephone Calls

1963  
1964  
1965  
1966  
1967  
1968  
1969

For patients not entering the OLE study, or who withdraw from the study early, safety telephone calls will be made weekly ( $\pm 3$  days) from Visit 9 until Visit 10. Patients or their caregivers will be asked for information on ongoing and new AEs, epilepsy-related hospitalizations, concomitant medications and/or changes to medication (including AEDs).

1970  
1971  
1972  
1973  
1974  
1975

## 10 WITHDRAWAL

1976  
1977  
1978  
1979  
1980  
1981  
1982

In accordance with the Declaration of Helsinki<sup>65</sup>, the FDA regulations relating to good clinical practice (GCP) and clinical trials<sup>66, 67, 68</sup>, the EU Clinical Trials Directive (2001/20/EC)<sup>69</sup> and/or other applicable regulations, a patient has the right to withdraw from the study at any time and for any reason without prejudice to his or her future medical care by the physician or at the institution.

1983

The patient must be withdrawn from the study if any of the following apply:

1984  
1985  
1986  
1987  
1988  
1989  
1990

- Administrative decision by the investigator, GW, or a Regulatory Authority.
- Pregnancy.
- Protocol deviation that is considered to potentially compromise the safety of the patient.
- Withdrawal of patient consent/assent.
- Withdrawal of parent(s)/legal representative consent.
- Lost to follow-up.

1991  
1992

Patients may also be withdrawn from the study for any of the following:

1993  
1994  
1995  
1996  
1997  
1998  
1999  
2000  
2001  
2002  
2003  
2004  
2005

- Patient non-compliance.
- AE which, in the opinion of the investigator, would compromise the continued safe participation of the patient in the study.
- ALT or AST  $>3 \times$  ULN with the appearance of fatigue, nausea, vomiting, right upper quadrant pain or tenderness, fever, rash, and/or eosinophilia ( $>5\%$ ).
- ALT or AST  $>8 \times$  ULN.
- ALT or AST  $>5 \times$  ULN for more than two weeks.
- ALT or AST  $>3 \times$  ULN **and** (TBL  $>2 \times$  ULN **or** INR  $>1.5$ ).
- Any evidence of drug abuse or diversion.
- Suicidal ideation or behavior of type four or five during the treatment period, as evaluated with the C-SSRS.

2006  
2007  
2008  
2009  
2010  
2011  
2012  
2013

Should a patient request or decide to withdraw from the study, all efforts must be made to complete and report the observations as thoroughly as possible up to the date of withdrawal. Patients who withdraw should have their dose of IMP tapered gradually (10% each day) over a period of 10 days, beginning at the time the decision is made to discontinue. In some cases, tapering the dose of IMP may be inadvisable (e.g., continued dosing is not possible due to an AE). The decision on whether or not to taper IMP will be left to the investigator's clinical judgment. All assessments required at Visit 8 should be conducted if possible. If the tapered dose is

2014  
2015  
2016  
2017  
2018  
2019

2020  
2021  
2022  
2023  
2024

administered, patients should return for Visit 9 if possible. Patients withdrawing due to an AE should be followed up according to [Section 12.7](#) safety follow-up visit. All information should be reported on the applicable CRF pages (refer to [Section 9.1](#)). Wherever possible, the safety follow-up visit should be conducted 28 days from the date of the last dose of IMP (refer to [Section 9.2.10](#)).

2025  
2026  
2027  
2028  
2029  
2030

2031

## **11 URGENT SAFETY MEASURES**

2032

The sponsor and investigator may take appropriate urgent safety measures in order to protect the patients of a clinical trial against any immediate hazard to their health or

2033

safety. If such measures are taken by the investigator they must notify GW

2034

immediately or at least within 24 hours of awareness. GW will report urgent safety

2035

measures to Competent Authorities by telephone within 24 hours of awareness,

2036

wherever possible, and will provided a written report to the Competent Authorities

2037

and IRB/EC within three days.

2038

2039  
2040  
2041  
2042  
2043  
2044

## 12 ADVERSE EVENT REPORTING

2045

### 12.1 Definitions

2046  
2047

#### 12.1.1 Adverse Event

2048  
2049

For the purposes of this study an AE is defined as:

2050

Any new unfavorable/unintended signs/symptoms (including abnormal laboratory findings), or diagnosis or worsening of a pre-existing condition, which is present following screening (Visit 1) and the post treatment, safety follow-up visit (Visit 10), which may or may not be considered to be related to the IMP. Any event that is the result of a study procedure must be recorded as an AE.

2051  
2052  
2053  
2054  
2055

Surgical/Investigational procedures are not AEs. The medical reason for the procedure is the AE. Elective hospitalizations for pre-study existing conditions or elective procedures are not AEs. The exception may be if the patient has an AE during hospitalization which prolongs their scheduled hospital stay, in which case it would be considered a SAE (refer to [Section 12.2](#)).

2056  
2057  
2058  
2059  
2060

If reporting a fatal event, the SAE term should be the underlying cause of the death (e.g., disease or medical condition leading to death).

2061  
2062  
2063

#### 12.1.2 Investigator

2064  
2065

The term investigator refers to the study PI or a formally delegated study physician.

2066  
2067  
2068

### 12.2 Serious Adverse Events

2069  
2070

During clinical investigations, AEs may occur which, if suspected to be IMP related, might be significant enough to lead to important changes in the way the IMP is developed (e.g., change in dose, population, monitoring need, consent/assent forms). This is particularly true for events that threaten life or function. Such SAEs will be reported promptly to Regulatory/Competent Authorities, applicable IRB/ECs and investigators (expedited reporting) by GW.

2071  
2072  
2073  
2074  
2075  
2076

An AE must only be classed as serious, i.e., a SAE, when the event falls into one of the following criteria:

2077  
2078

- Results in death.
- Is life-threatening.\*
- Requires inpatient hospitalization or prolongation of existing hospitalization.
- Results in persistent or significant disability/incapacity.

2079  
2080  
2081  
2082

2083  
2084  
2085  
2086  
2087  
2088

- 2089
- Is a congenital anomaly/birth defect.
  - Is medically significant.\*\*
- 2090

2091 \* The term “life-threatening” in the definition of “serious” refers to an event in which  
2092 the patient was at risk of death at the time of the event; it does not refer to an event,  
2093 which hypothetically might have caused death if it were more severe.

2094 \*\* Medical and scientific judgment should be exercised in deciding whether SAE  
2095 reporting is appropriate in other situations. Important medical events may not be  
2096 immediately life threatening or result in death or hospitalization but may jeopardize  
2097 the patient or may require intervention to prevent one of the other outcomes listed in  
2098 the definition above. These should also usually be considered serious. Examples of  
2099 such events are intensive treatment in an emergency room or at home for allergic  
2100 bronchospasm; blood dyscrasias or convulsions that do not result in hospitalization; or  
2101 development of drug dependency or drug abuse.

2102

### 2103 **12.3 Reporting Procedures for Serious Adverse Events**

2104

2105 All SAEs occurring during the study must be reported to GW with any other  
2106 supporting information and recorded in the AE section of the CRF. Any on-going  
2107 SAEs should be followed up until resolution wherever possible. For all deaths, the  
2108 working diagnosis or cause of death as stated on a death certificate, available autopsy  
2109 reports and relevant medical reports should be sent to GW promptly.

2110 **All SAEs must be reported directly to GW PVD within 24 hours of discovery or**  
2111 **notification of the event.** All SAE information must be recorded on the SAE forms  
2112 provided in the site files and faxed to GW PVD. Additional information received for  
2113 a case (follow-up or corrections to the original case) need to be detailed on a new  
2114 SAE form, signed/dated and faxed to the GW PVD and the AE section of the CRF  
2115 must be updated.

2116 The investigator should continue to document all AEs which occur up to the last  
2117 formal follow-up observational period (Visit 10). If the investigator subsequently  
2118 becomes aware of a new IMP-related SAE after the last formal follow-up period of  
2119 the study, these should still be reported to the GW PVD.

2120 Any other problem discovered outside these time limits which is deemed to be an  
2121 unexpected safety issue and is likely to have an impact on patients who have  
2122 participated in the study, then these should be treated as an SAE and reported to GW  
2123 PVD. Such post study SAEs do not need to be recorded on the patient’s CRF if  
2124 editing rights to the CRF have been removed.

2125  
2126  
2127  
2128  
2129  
2130

Contact details for the GW PVD are provided at the front of the site files for all study centers, and upon the GW SAE Report form.

2133

### 12.3.1 Potential Cases of Drug-Induced Liver Injury

2134  
2135  
2136

Abnormal values in AST and/or ALT concurrent with abnormal elevations in TBL that meet the criteria outlined below are considered potential cases of drug-induced liver injury and will be considered as protocol defined criteria for withdrawal and important medical events.

2137  
2138  
2139

- ALT or AST  $>3 \times$  ULN with the appearance of fatigue, nausea, vomiting, right upper quadrant pain or tenderness, fever, rash, and/or eosinophilia ( $>5\%$ ).
- ALT or AST  $>8 \times$  ULN.
- ALT or AST  $>5 \times$  ULN for more than two weeks.
- ALT or AST  $>3 \times$  ULN **and** (TBL  $>2 \times$  ULN **or** INR  $>1.5$ ).

2140  
2141  
2142  
2143  
2144  
2145  
2146

The investigator will arrange for the patient to return to the investigational site as soon as possible (within 24 hours of notice of abnormal results) for repeat assessment, detailed history and physical examination. Patients should be followed until all abnormalities have normalized (in the investigator's opinion) or returned to the baseline state.

2147  
2148  
2149  
2150  
2151  
2152

### 12.4 Pregnancy

2153  
2154  
2155  
2156  
2157  
2158

Any patient, or patient's partner, who has become pregnant whilst receiving IMP, or within 90 days of last dose of IMP, must be reported to the GW PVD within 24 hours of first awareness. Please use the GW Pregnancy Monitoring Forms provided. Where possible the investigator should provide the outcome of the pregnancy.

2159  
2160  
2161  
2162  
2163

The investigator is not obliged to actively monitor for any pregnancies that commence more than 90 days after the final dose of IMP. However, if the investigator becomes aware of a new pregnancy outside this time limit then they should report it as above. GW PVD will follow-up for all pregnancy outcomes.

2164  
2165  
2166  
2167  
2168

### 12.5 Causality Assessment

Causality assessment is required for all AEs and SAEs. Causality assessment must only be assigned by the investigator. All cases judged as having a reasonable suspected causal relationship to the IMP must be reported as such. The expression



2169  
2170  
2171  
2172  
2173  
2174

“reasonable causal relationship” is meant to convey in general that there are facts (evidence) or arguments to suggest a causal relationship.

2177 The following question which must be answered by the investigator for all AEs is  
2178 used to capture the reasonable causal relationship of an event to the IMP:

2179 “In your opinion is there a plausible relationship to the IMP?” The answer is “yes”,  
2180 or “no”.

2181 Events that start before the first dose of IMP (pre-treatment) should be considered as  
2182 not causally related. Where a pre-treatment event worsens in severity following the  
2183 first dose of IMP a new event record should be entered into the CRF.

2184 Considering the explanation given above, investigators are strongly encouraged to  
2185 express their opinion on what the cause of an AE might be. For individual patients,  
2186 the investigator is usually in the best position to assess the underlying suspected cause  
2187 of an AE. For all AEs and especially SAEs, it is important that the investigator assess  
2188 not only the possible role of the IMP but also competing etiological factors as the  
2189 underlying cause. Factors for consideration may include:

- 2190 • Medical history.
  - 2191 • Lack of efficacy/worsening of treated condition.
  - 2192 • Concomitant or previous treatment.
  - 2193 • Withdrawal of IMP.
  - 2194 • Protocol-related procedure.
- 2195

## 2196 **12.6 Reporting Procedures for All Adverse Events**

2197 All AEs (including SAEs) occurring during the study will be reported on the running  
2198 logs in the AE section of the CRF. This includes all events from the time following  
2199 screening (Visit 1) to post study follow-up (Visit 10), whether or not attributed to IMP  
2200 and observed by the investigator or patient.

2202 The following information will need to be provided for all AEs:

### 2203 **A) Adverse event (diagnosis or syndrome if known, or signs and symptoms)**

2204 Where the investigator cannot determine a diagnosis, signs or symptoms should be  
2205 recorded on the AE section of the CRF. Once a diagnosis has been determined the  
2206 AE section of CRF must be updated to reflect the diagnosis in replacement of the  
2207 original symptoms. In circumstances where only a provisional diagnosis is possible  
2208 (working diagnosis), the CRF must be updated to reflect the provisional diagnosis in  
2209 replacement of the original symptoms. In some circumstances it may be relevant for  
2210

2211  
2212  
2213  
2214  
2215  
2216

the investigator to include the symptoms alongside the diagnosis in the verbatim event description. However, the diagnosis (full or provisional) should be clearly stated e.g., fever and malaise due to a respiratory tract infection.

2220  
2221

#### **B) Adverse Event Start date and Stop date**

2222

The start and stop dates of the event must be provided. All AEs require these fields to be completed in full. Partial dates or missing dates are not normally acceptable and significant effort must be undertaken to obtain any unknown information. If a precise date is not known an estimated date should be provided instead. When a complete date cannot be given then record as much information as possible (i.e., month and year or in exceptional circumstances just year). When the actual start date becomes known the CRF must be updated to replace the previously recorded date.

2223

2224

2225

2226

2227

2228

2229

2230

#### **C) Outcome**

2231

The outcome of the event must be recorded accurately and classified into one for the following categories:

2232

2233

- Recovered.
- Recovered with sequelae.
- Continuing.
- Patient died.

2234

2235

2236

2237

2238

#### **D) Severity**

2239

When describing the severity of an AE the terms mild, moderate, or severe should be used. Clinical judgment should be used when determining which severity applies to any AE.

2240

2241

2242

If the severity of an AE fluctuates day-to-day, for example, a headache or constipation, the change in severity should not be recorded each time, instead only the worst observed severity should be recorded with AE start and stop dates relating to the overall event duration regardless of severity.

2243

2244

2245

2246

A severe AE is not the same as a SAE. For example, a patient may have severe vomiting but the event does not result in any of the SAE criteria above. Therefore it should not be classed as serious.

2247

2248

2249

2250

#### **E) Causality**

2251

See [Section 12.5](#) above.

2252  
2253  
2254  
2255  
2256  
2257

## F) Action taken with Study Medication

2258  
2259 This question refers to the action taken with the IMP due to an AE. The action with  
2260 the IMP must be classed as:

- 2261
- None.
  - Dose reduced temporarily.
  - Dose reduced.
  - Study medication interrupted.
  - Study medication stopped.
- 2262  
2263  
2264  
2265  
2266

## 12.7 Follow-up Procedures for Adverse Events

2267  
2268 The investigator may be asked to provide follow-up information to the GW PVD for  
2269 any AEs reported.  
2270

2271 AEs considered related to the IMP by the investigator or the sponsor should be  
2272 followed up until resolution or the event is considered stable.

2273 It will be left to the investigator's clinical judgment whether or not an AE is of  
2274 sufficient severity to require the patient's removal from treatment. A patient may also  
2275 voluntarily withdraw from treatment due to what he or she perceives as an intolerable  
2276 AE; further details of withdrawal are presented in [Section 10](#). If either of these  
2277 occurs, the patient must undergo an end of treatment assessment and be given  
2278 appropriate care under medical supervision until symptoms cease or the condition  
2279 becomes stable.  
2280

## 12.8 Reporting Clinically Significant Laboratory Results

2281  
2282 All investigational sites are required to submit to the GW PVD the laboratory results  
2283 for any patient after randomization that meet the criteria for the selected laboratory  
2284 parameters as follows:  
2285

- 2286
- ALT or AST  $>3 \times$  ULN with the appearance of fatigue, nausea, vomiting,  
2287 right upper quadrant pain or tenderness, fever, rash, and/or eosinophilia  
2288 ( $>5\%$ ).
  - ALT or AST  $>8 \times$  ULN.
  - ALT or AST  $>5 \times$  ULN for more than two weeks.
  - ALT or AST  $>3 \times$  ULN **and** (TBL  $>2 \times$  ULN **or** INR  $>1.5$ ).
- 2289  
2290  
2291

2292  
2293  
2294  
2295  
2296  
2297

2298 These reports must be sent to the GW PVD using the same fax number for SAE  
2299 reporting within 24 hours of becoming aware of the results. In addition, please send a  
2300 copy of the patient's baseline laboratory results with all reports to GW PVD.  
2301

2302  
2303  
2304

## 12.9 Notification of Safety Information to Investigators, Regulatory Authorities and Ethics Committees

2305  
2306  
2307  
2308  
2309

In accordance with the EU Clinical Trials Directive<sup>69</sup>, relevant parts of the FDA Code of Federal Regulations<sup>70</sup> and any national regulations, GW will inform investigators, regulatory authorities and relevant IRB/ECs of all relevant safety information. This will include the reporting of relevant SAEs and all Suspected Unexpected Serious Adverse Reactions (SUSARs).

2310

This information will be provided through three sources:

2311  
2312  
2313  
2314  
2315  
2316  
2317  
2318  
2319  
2320  
2321  
2322  
2323  
2324  
2325

- 1) IB<sup>63</sup>: a compilation of the clinical and non-clinical safety data available on the IMP that is relevant to the study on the IMP in human patients. The IB is updated annually.
- 2) Development Core Safety Information: this document actually forms the Safety Section of the IB<sup>63</sup>, or is updated as an appendix of the IB<sup>63</sup>. This document is revised if necessary, when new important safety information becomes available (potentially up to a few times a year).
- 3) Council for International Organizations of Medical Sciences (CIOMS) reports: these reports are issued every time a SUSAR is reported to GW. They provide information on individual case reports and are sent to all the regulatory authorities, the relevant central IRB/ECs which have approved the study and investigators. As required, the investigator should notify their regional ethical committees of SAEs or SUSARs occurring at their site and other AE reports, i.e., CIOMS reports and any additional safety documentation received from GW, in accordance with local procedures.

2326  
2327  
2328  
2329  
2330  
2331

In the USA, investigators are normally required to promptly report to their IRBs all unanticipated problems involving risks to human patients, or others, including AEs that should be considered unanticipated problems. Based on current FDA guidance<sup>66</sup> the following clarification is provided in determining what constitutes an unanticipated problem:

2332  
2333  
2334  
2335  
2336

In general, an AE observed during the conduct of a study should be considered an unanticipated problem involving risk to human patients, and reported to the IRB, *only* if it were unexpected, serious, and would have implications for the conduct of the study (e.g., requiring a significant, and usually safety-related, change in the protocol such as revising inclusion/exclusion criteria or including a new monitoring

2337  
2338  
2339  
2340  
2341  
2342

requirement, informed consent/assent, or IB). An individual AE occurrence *ordinarily* does not meet these criteria because, as an isolated event, its implications for the study cannot be understood.

2346 The FDA guidance<sup>70</sup> states that, accordingly, to satisfy the investigator's obligation to  
2347 notify the IRB of unanticipated problems, any investigators participating in a  
2348 multicenter study may rely on the sponsor's assessment and provide to the IRB a  
2349 report of the unanticipated problem prepared by the sponsor.

2350 GW will inform investigators (regulatory authorities and applicable IRB/ECs) of any  
2351 safety issues or case reports that are considered to be unanticipated and provide such  
2352 reports as mentioned above. It should be noted that a single SUSAR report notified to  
2353 investigators in the study does not necessarily constitute an unanticipated problem  
2354 unless identified by GW in the submission cover letter.

2355 As a minimum, the recipient will be sent all of the above and relevant updates  
2356 between the period from ethical approval and final database lock.

2357  
2358  
2359  
2360  
2361  
2362

2363

## **13 STATISTICAL CONSIDERATIONS**

2364

A statistical analysis plan (SAP) will be produced prior to unblinding of the study.

2365

Any deviations from the original SAP will be described in the final clinical study

2366

report.

2367

2368

### **13.1 Sample Size, Power and Significance Levels**

2369

2370

A total of 120 patients will be enrolled. The 120 patients will be randomly allocated on a 1:1:1 basis to the three treatment groups (40 patients per group). Patients in the placebo group will be split into two cohorts (20 receiving Low Dose Level dosing volumes and 20 receiving High Dose Level dosing volumes), but it is assumed that these two cohorts can be pooled for the analyses of efficacy.

2371

2372

2373

2374

2375

If it is assumed that patients in the placebo group will experience a mean reduction in convulsive seizure frequency of 10% (from baseline), this sample size of 40 patients per group will be sufficient to detect a difference of 40% between treatments (i.e., patients receiving GWP42003-P will experience at least a 50% reduction in convulsive seizures). This is based on a standard deviation of 63%, using a two-tailed 5% significance level and 80% power.

2376

2377

2378

2379

2380

2381

2382

### **13.2 Interim Analysis**

2383

2384

No interim analysis is planned for this study.

2385

2386

2387

### **13.3 Analysis Sets**

2388

2389

There will be up to three analysis sets:

2390

#### **Intention to Treat (ITT)**

2391

- All patients who are randomized and receive IMP in the study will be included and analyzed according to their randomized treatment group.

2392

2393

- The ITT analysis set is the primary analysis set for all efficacy endpoints.

2394

2395

#### **Per Protocol (PP)**

2396

If there are a sufficient number of significant protocol deviations in the study, a PP analysis set may also be presented.

2397

2398

- All patients who complete the study with no protocol deviations deemed to compromise the assessment of efficacy will be included and analyzed

2399

2400  
2401  
2402  
2403  
2404  
2405

according to the treatment group they were randomized. The rules determining the PP analysis set will be fully defined prior to unblinding of the database.

2409  
2410

## **Safety**

2411 All patients who received at least one dose of IMP in the study will be included and  
2412 analyzed according to the treatment received. Only patients for whom it has been  
2413 confirmed that they did not take any IMP will be excluded from this safety analysis  
2414 set.

2415

### **13.3.1 Protocol Deviations**

2417

2418 Protocol deviations will be listed and reasons for exclusion from the analysis  
2419 populations will be summarized.

2420

### **13.4 General Considerations**

2422

2423 Unless stated otherwise, continuous variables will be summarized showing the  
2424 number of non-missing values ( $n$ ), mean, standard deviation, median, minimum and  
2425 maximum and categorical variables will be summarized showing the number and  
2426 percentage of patients falling in each category.

2427

### **13.5 Accountability and Background Characteristics**

2429

#### **13.5.1 Enrollment and Disposition**

2431

2432 All patients (screened, randomized, prematurely terminated IMP) will be accounted  
2433 for in the enrollment and disposition summary tables.

2434

#### **13.5.2 Baseline and Demographic Characteristics**

2436

2437 Age, sex, race and any other demographic or baseline characteristics will be  
2438 summarized by randomized treatment group, using appropriate summary statistics.

2439

#### **13.5.3 Medical History**

2441

2442 Previous and current medical conditions will be summarized by system organ class,  
2443 including details of the duration of epilepsy and the types of seizures currently  
2444 experienced by the patients.

2445  
2446  
2447  
2448  
2449  
2450

### 13.5.4 Concomitant Medication

2451  
2452  
2453  
2454  
2455  
2456

Concomitant medications (including standard AED and rescue medication) taken prior to and during the study will be summarized separately, by medication class and active ingredients.

2457

### 13.6 Endpoints and Statistical Methods

2458  
2459  
2460  
2461  
2462  
2463  
2464  
2465  
2466  
2467  
2468  
2469

Statistical hypothesis testing will be performed on the primary endpoint and other endpoints as appropriate. Since there is a single primary analysis endpoint, no formal adjustment of statistical significance for multiple testing on multiple endpoints is required, although such multiplicity should be allowed for when interpreting the results for secondary endpoints. However, there are three treatments, so multiple significance testing will occur when making comparisons between the treatments; the major comparisons of interest are those between each of the GWP42003-P Dose Levels and placebo and, in particular, the High Dose Level and placebo. The dose response effect between the two GWP42003-P Dose Levels and placebo will also be explored. No formal adjustment will be made for the comparisons between multiple treatment groups.

2470  
2471  
2472  
2473  
2474  
2475  
2476  
2477  
2478

A Mixed-Effect Model Repeated Measures (MMRM) approach will be used for the analysis of continuous variables and logistic regression for categorical variables: the overall test from these procedures will determine whether there are any statistically significant differences between the treatment groups. Comparisons between individual treatments should be interpreted in the light of the result of the overall test, e.g., if the overall test is not statistically significant (indicating that there is little evidence of any difference between the treatments) then an individual comparison that does appear to be significant should be treated with caution.

2479

#### 13.6.1 Evaluable Period

2480  
2481  
2482  
2483

The start of the evaluable period of the study (Day 1) is defined as the first day the patient took IMP, as recorded in the IVRS, or the day of randomization if this date is unknown.

2484

The end of the evaluable period is defined as the earliest of:

2485  
2486

- (i) Day 99 of treatment for the IVRS reported efficacy data and the day of Visit 8 for the CRF-based efficacy data;



2487  
2488  
2489  
2490  
2491  
2492

- (ii) The last day on which study IMP was taken (as stated on the study outcome CRF) for the IVRS reported efficacy data and the day after this for the CRF-based efficacy data;
- (iii) The day before a relevant change in prohibited or AED medications was made.

2493  
2494  
2495  
2496  
2497  
2498

### 13.6.2 Primary Endpoint(s)

2499  
2500  
2501  
2502  
2503

The primary endpoint is the mean percentage change from baseline in convulsive seizure frequency during the maintenance period of the study (Day 15 to the end of the evaluable period) in patients taking GWP42003-P compared with placebo.

2504  
2505  
2506  
2507  
2508  
2509  
2510  
2511  
2512  
2513

If the data are found to be normally distributed, they will be analyzed using a MMRM approach. The model will include baseline as a covariate and treatment group as fixed factor. The time variable will be the assessment time-point (nominal visit number, corresponding to each 28 days of the maintenance period) treated as a categorical repeated factor. Assessments will be assigned to the nominal visit number using visit windows such that each assessment will be assigned to the earliest scheduled visit that occurs either within three days before the actual visit date or on or after the date of the actual visit. The baseline-by-time and treatment-by-time interactions will also be included. The model will have a separate unstructured covariance matrix in each treatment group.

2514  
2515  
2516

The fitted model will then be used to produce a final time-point comparison, which implicitly adjusts for missing observations under the assumption of missing at random; there will be no imputations for missing values at individual time-points.

2517  
2518  
2519

The time course of the treatment effect will also be examined by estimating treatment differences, together with their 95% confidence intervals (CIs), for each nominal visit during the randomized treatment period.

2520  
2521  
2522  
2523

However, due to the nature of seizure data, if a normal distribution cannot be assumed, the data will be analyzed using appropriate non-parametric methods (e.g., Kruskal-Wallis and Wilcoxon Signed Rank tests).

2524  
2525  
2526  
2527

### 13.6.3 Secondary Endpoint(s)

The following endpoints will be compared between the three treatment groups over the 12-week, double-blind maintenance period:

2528  
2529  
2530  
2531  
2532  
2533

- 2534 • Number of patients experiencing a >25% worsening, -25 to +25% no change,
- 2535 25–50% improvement, 50–75% improvement or >75% improvement in
- 2536 convulsive seizures from baseline.
- 2537 • Number of patients who are convulsive seizure free.
- 2538 • Percentage changes from baseline in non-convulsive seizure frequency.
- 2539 • Change in types of seizures.
- 2540 • Changes from baseline in usage of rescue medication.
- 2541 • Changes from baseline in number of inpatient hospitalizations due to epilepsy.
- 2542 • Changes from baseline in Sleep Disruption 0–10 NRS score.
- 2543 • Changes from baseline in EDSS score.
- 2544 • Changes from baseline in the QOLCE score.
- 2545 • Change in cognitive function as measured with the cognitive assessment
- 2546 battery.
- 2547 • Changes from baseline in the Vineland-II score.
- 2548 • CGIC.

2549  
2550  
2551  
2552  
2553

The number of patients experiencing at least a 25%, 50% and 75% reduction in convulsive seizures and the number of patients seizure free will be summarized and analyzed using the difference in proportions and the odds ratios comparing the treatment groups will be presented together with 95% CIs.

2554  
2555  
2556  
2557  
2558  
2559  
2560  
2561

For changes in non-convulsive seizure frequency, number of convulsive seizure free days, changes in frequency of other seizure type, usage of rescue medication, number of hospitalizations due to epilepsy, sleep disruption, daytime sleepiness, QOLCE, cognitive function and behavior assessments, the data will summarized at baseline and at each time point (or 28-day period, as appropriate) during the treatment period. Changes from baseline to the end of study will be analyzed using MMRM, as with the primary endpoint (or appropriate non-parametric methods if data are found to be not normally distributed).

2562  
2563  
2564  
2565

The CGIC will be summarized at all time-points and the final assessments recorded at the end of treatment will be analyzed with ordinal logistic regression using the proportional odds model.

2566  
2567  
2568  
2569  
2570

#### **13.6.4 Handling of Missing Data**

The primary efficacy analysis uses the ITT analysis set over the evaluable period. MMRM analysis will be used to handle missing values under the Missing at Random assumption.

2571  
2572  
2573  
2574  
2575  
2576

If any patients have data censored then a sensitivity analysis will be done using all available data, including the data censored from the primary analyses, to assess the impact of censoring the data.

2577  
2578  
2579

2580  
2581  
2582

Analysis of covariance of the final time-point, using the Last Observation Carried Forward (LOCF) approach, will also be performed as sensitivity analyses for the primary and key secondary endpoints.

2583  
2584

In order to explore the robustness of the primary analysis, further sensitivity analysis may be specified in the SAP.

2585  
2586  
2587

Similar approaches, using the LOCF, will be applied if the data are analyzed using non-parametric methods.

2588

### **13.6.5 Safety**

2589

2590

In the presentation of safety data, data from the two cohorts of placebo patients (Low Dose Level and High Dose Level) will be presented separately and pooled together.

2591

2592

This will allow the possibility to explore any effects of the volume of IMP on safety endpoints.

2593

2594

2595

#### **13.6.5.1 Treatment Compliance and Extent of Treatment Exposure**

2596

Treatment compliance and exposure to treatment will be summarized.

2597

2598

2599

#### **13.6.5.2 Adverse Events**

2600

AEs will be coded according to the Medical Dictionary for Regulatory Activities dictionary.

2601

2602

A treatment emergent AE is one that started, or worsened in severity or seriousness, following the first dose of IMP.

2603

2604

Descriptive presentations of treatment emergent AEs will be given by preferred term and system organ class for the safety analysis. The number of patients reporting at least one AE will be provided.

2605

2606

2607

The following summaries will be produced:

2608

- All-causality AEs.

2609

- Treatment related AEs.

2610

- All-causality AEs by severity.

2611

- All-causality serious AEs.

2612  
2613  
2614  
2615  
2616  
2617

- 2618 • Treatment related serious AEs.
- 2619 • AEs reported as leading to permanent cessation of study treatment.
- 2620 • Fatal AEs.

2621

### 2622 **13.6.5.3 Clinical Laboratory Data**

2623 Clinical laboratory data at screening, during and at the end of treatment and the  
2624 change from baseline to end of treatment will be summarized for the safety analysis  
2625 set using appropriate summary statistics. Categorical shift tables will also be  
2626 presented, showing the numbers of patients with values outside of the normal range.

2627

### 2628 **13.6.5.4 Vital Signs, 12-lead Electrocardiogram, Physical** 2629 **Examination, Columbia-Suicide Severity Rating Scale and** 2630 **Other Safety Data**

2631 Vital signs, ECG, physical examination and C-SSRS data will be summarized for the  
2632 safety analysis set, at screening, baseline and at each time point during the treatment  
2633 period using appropriate summary statistics. Changes in the vital signs from baseline  
2634 to end of treatment will also be summarized. CWS and Study Medication Use and  
2635 Behavior Survey data will be summarized for the safety analysis set using appropriate  
2636 summary statistics.

2637  
2638  
2639  
2640  
2641  
2642

2643

## **14 DATA SAFETY MONITORING COMMITTEE**

2644

An independent DSMC will monitor the DS diagnosis of screened patients on an ongoing basis in order to ascertain the correct study population is randomized.

2645

2646

Investigators will submit a documented history of DS, directly to the DSMC, for confirmation of diagnosis by the DSMC. The DSMC will provide written documentation of the confirmation of diagnosis directly to the investigator, for inclusion in the patient file.

2647

2648

2649

2650

Details of the composition and standard operating procedures of the DSMC will be detailed in a separate charter.

2651

2652  
2653  
2654  
2655  
2656  
2657

## 15 REGULATORY AND ETHICAL OBLIGATIONS

2658

### 15.1 Declaration of Helsinki

2659  
2660  
2661  
2662  
2663  
2664

The investigator will ensure that this study is conducted in full conformity with the Declaration of Helsinki<sup>65</sup>, EU Clinical Trials Directive<sup>69</sup> and the clinical trial regulations adopting European Commission Directives into national legislation<sup>71, 72, 73</sup>.

2665

### 15.2 Informed Consent/Assent

2666  
2667  
2668  
2669  
2670  
2671  
2672

Initial master informed consent and assent forms will be provided to the investigator to prepare the informed consent/assent documents to be used at his or her center. The GW Clinical Manager will communicate updates to the templates by letter. The written informed consent/assent documents should be prepared in the language(s) of the potential patient population.

2673  
2674  
2675  
2676  
2677  
2678  
2679  
2680

Before a patient's participation in the trial, the investigator is responsible for obtaining written informed consent/assent from the patient and/or parent(s)/legal representative after adequate explanation of the aims, methods, anticipated benefits and potential hazards of the study and before any protocol specific screening procedures or any IMPs are administered. The patient and parent(s)/legal representative should have ample time for review to consider the information provided before giving written consent/assent; more specific definitions of ample time may be in force if required by ECs/IRBs or local regulations.

2681  
2682  
2683  
2684  
2685  
2686  
2687  
2688  
2689  
2690

The acquisition of informed consent/assent should be documented in the patient's medical records and the informed consent/assent forms should be signed and personally dated by the patient and/or parent(s)/legal representative (as applicable) and by the person who conducted the informed consent/assent discussion. GW also requires a physician to be present for consent/assent and to sign the consent/assent forms as well. The original signed informed consent/assent forms should be retained and a copy provided to the patient and/or parent(s)/legal representative. Please note that in certain countries there is a requirement for the patient's family doctor to be informed of the patient's participation in the clinical study.

### 15.3 Institutional Review Board/Ethics Committee

2691  
2692  
2693  
2694

A copy of the protocol, proposed informed consent/assent forms, other patient information material, any proposed advertising material and any further

2695  
2696  
2697  
2698  
2699  
2700

documentation requested must be submitted to the IRB/EC for written approval. GW must receive a copy of the written approval of the protocol and informed consent/assent forms before enrollment of patients into the study and shipment of IMP.

2705  
2706  
2707  
2708  
2709

The investigator must submit and, where necessary, obtain approval from the IRB/EC for all subsequent protocol amendments and changes to the informed consent/assent documents. The investigator should notify the IRB/EC of deviations from the protocol or SAEs occurring at the center and other AE reports received from GW, in accordance with local procedures.

2710  
2711  
2712  
2713

The investigator will be responsible for obtaining on-going IRB/EC approval/renewal throughout the duration of the study. Copies of the investigator's reports and the IRB/EC continuance of approval must be sent to GW.

2714  
2715  
2716  
2717

#### **15.4 Pre-Study Documentation Requirements**

The investigator is responsible for forwarding the following documents to GW for review before allowing any patients to consent/assent for entry into the study:

2718  
2719  
2720  
2721  
2722  
2723  
2724  
2725  
2726  
2727  
2728  
2729  
2730  
2731  
2732  
2733  
2734  
2735  
2736

- Signed and dated protocol signature page.
- Copy of approved informed consent/assent forms and other patient information material.
- Copy of the IRB/EC approval of the protocol, informed consent/assent forms and other patient information material.
- Up to date curriculum vitae and medical licenses (as per local regulations) of the PI and all sub-investigators.
- The IRB/EC composition and/or written statement of the IRB/EC in compliance with the FDA regulations relating to GCP and clinical trials<sup>66, 67, 68, 74</sup>, the EU Clinical Trials Directive<sup>69</sup>, or International Conference on Harmonization Tripartite Guideline for Good Clinical Practice (ICH GCP)<sup>75</sup> where the EU Clinical Trials Directive does not apply.
- Signed laboratory normal ranges and documentation of laboratory certification (or equivalent) unless using central laboratory arranged by GW.
- Signed clinical trial agreement (including patient/investigator indemnity insurance and financial agreement).
- FDA 1572 form.
- Completed financial disclosure statements for the PI and all sub-investigators if relevant.

2737  
2738  
2739  
2740  
2741  
2742

## 15.5 Patient Confidentiality

2743  
2744  
2745  
2746  
2747  
2748  
2749  
2750

The investigator must ensure that the patient's anonymity is maintained. On the CRFs and within the databases used to collect the trial data or other documents submitted to GW, patients should be identified by their initials (if allowed per local regulations) and a patient study number only. Documents that are not for submission to GW, e.g., signed informed consent/assent forms, should be kept in strict confidence by the investigator.

2751  
2752  
2753  
2754  
2755  
2756  
2757  
2758  
2759

In compliance with the FDA regulations relating to GCP and clinical trials<sup>66, 67, 68, 74</sup>, and the EU Clinical Trials Directive<sup>69</sup>/ICH GCP Guidelines<sup>75</sup>, it is required that the investigator and institution permit authorized representatives of the company, the regulatory agencies and the IRB/EC direct access to review the patient's original medical records for verification of study related procedures and data. Direct access includes examining, analyzing, verifying and reproducing any records and reports that are important to the evaluation of the study. The investigator is obligated to inform the patient that his/her study related records will be reviewed by the above named representatives without violating the confidentiality of the patient.

2760  
2761  
2762  
2763  
2764  
2765  
2766

All information concerning the IMP and operations of GW such as patent applications, formulae, manufacturing processes, basic scientific data or formulation information supplied to the investigator by the company and not previously published is considered confidential by the company and shall remain the sole property of the company. The investigator will agree to use this information only in accomplishing the study and will not use it for any other purposes without the written consent of the company.



2767  
2768  
2769  
2770  
2771  
2772

## 2773 **16 ADMINISTRATIVE AND LEGAL OBLIGATIONS**

### 2774 **16.1 Protocol Amendments and End of Study or Termination**

2775  
2776 Protocol amendments must be made only with the prior approval of GW. Agreement  
2777 from the investigator must be obtained for all protocol amendments and amendments  
2778 to the informed consent/assent documents. The IRB/EC must be informed of all  
2779 amendments and give approval for any substantial amendments. Amendments for  
2780 administrative changes can be submitted to the IRB/EC for information only. The  
2781 investigator must send a copy of the approval letter from the IRB/EC to GW.

2782 Both GW and the investigator reserve the right to terminate the study, according to  
2783 the clinical trial agreement. The investigator should notify the IRB/EC in writing of  
2784 the study's completion or early termination and send a copy of the notification to GW.  
2785

### 2786 **16.2 Study Documentation and Storage**

2787  
2788 The investigator should maintain a list of appropriately qualified persons to whom  
2789 he/she has delegated study duties. All persons authorized to make entries and/or  
2790 corrections on CRFs will be included on the GW delegation of authority and signature  
2791 form.

2792 Source documents are original documents, data and records from which the patient's  
2793 CRF data are obtained. These include, but are not limited to, hospital records, clinical  
2794 and office charts, laboratory and pharmacy records, diaries, electronic data captured  
2795 by IVRS, microfiches, radiographs and correspondence. CRF entries may be  
2796 considered source data if the CRF is the site of the original recording, that is, there is  
2797 no other written or electronic record of data. In the rare situations of this happening,  
2798 then the source data from the CRF should be transcribed in the patient's notes with  
2799 appropriate signature and date to provide a full audit trail. A source data verification  
2800 plan, identifying the source for each data point at each center, will be agreed with  
2801 each center prior to patient recruitment.

2802 The investigator and study staff are responsible for maintaining a comprehensive and  
2803 centralized filing system of all study related, essential documentation (as outlined in  
2804 ICH E6 Section 8.2<sup>75</sup>), suitable for inspection at any time by representatives from GW  
2805 and/or applicable regulatory authorities. Elements should include:

- 2806 • Patient files containing completed CRFs, informed consent/assent forms and  
2807 supporting copies of source documentation.

2808  
2809  
2810  
2811  
2812  
2813

- 2814 • Study files containing the protocol with all amendments, IB, copies of pre-  
2815 study documentation (see [Section 15.4](#)) and all correspondence to and from  
2816 the IRB/EC and GW.
- 2817 • Proof of receipt, IMP accountability record, return of IMP for destruction,  
2818 final IMP reconciliation statement and all drug related correspondence.

2819  
2820  
2821

In addition, all original source documents supporting entries on the CRFs, diary data and electronic data captured by IVRS must be maintained and be readily available.

2822  
2823  
2824  
2825  
2826  
2827  
2828  
2829  
2830  
2831  
2832

Following completion or termination of a clinical study GW will initiate proper archive of clinical study related documentation and electronic records generated by the investigator and/or GW. All clinical trial related documents and electronic records will be retained within an archiving system for a period dependent upon need and for a minimum of 20 years. Essential documents should be retained until at least two years after the last approval of a marketing application in an ICH region and until there are no pending or contemplated marketing applications in an ICH region or at least two years have elapsed since the formal discontinuation of clinical development of the IMP. These documents should be retained for a longer period however if required by the applicable regulatory requirements or if needed by GW (EU Directive 2005/28/EC Chapter 4 Trial Master File and Archiving Article 16<sup>76</sup>).

2833  
2834  
2835  
2836  
2837  
2838

GW will inform the investigators for each site in writing of the need for record retention. No study document should be destroyed without prior written agreement between GW and the investigator. Should the investigator wish to assign the study records to another party or move them to another location, he/she must notify GW in writing of the new responsible person and/or the new location.

2839  
2840

### 16.3 Study Monitoring and Data Collection

2841  
2842  
2843  
2844

The GW representative and regulatory authority inspectors are responsible for contacting and visiting the investigator for the purpose of inspecting the facilities and, upon request, inspecting the various records of the study for example, CRFs and other pertinent data provided that participant confidentiality is respected.

2845  
2846  
2847  
2848  
2849  
2850

The GW study monitor, or designee, is responsible for inspecting the CRFs and available IVRS/diary data at regular intervals throughout the study to verify adherence to the protocol, completeness, accuracy and consistency of the data and adherence to local regulations on the conduct of clinical research. The study monitor should have access to patient medical records and other study related records needed to verify the entries on the CRFs.

2851  
2852  
2853  
2854  
2855  
2856

The investigator agrees to co-operate with the study monitor to ensure that any problems detected in the course of these monitoring visits are resolved.

2859  
2860  
2861  
2862  
2863  
2864

The investigator is responsible for ensuring the data recorded in the CRFs are accurate and complete. The CRF should be completed within five working days after the patient's visit and before review by the study monitor. Queries generated by GW or its representative are to be answered within a similar period of time. Shorter periods of time may apply during specific situations such as interim analysis or final database cleaning.

2865  
2866  
2867  
2868  
2869  
2870  
2871  
2872

All handwritten medical records should be filled out with a black or blue ball-point pen and must be legible. Corrections to paper forms will be made by a single line stroke through the error and insertion of the correction above or beside the error. The change must be initialed and dated by the investigator or a member of the study staff authorized by the investigator. No correction fluid or tape may be used. The PI will sign and date the indicated places on the CRF. These signatures will indicate that the PI inspected or reviewed the data on the CRF, the data queries and the site notifications and agrees with the content.

2873  
2874  
2875  
2876  
2877  
2878  
2879  
2880  
2881

To ensure the quality of clinical data across all patients and centers, a clinical data management review will be performed on patient data received at GW or a contract research organization (CRO). During this review, patient data will be checked for consistency, omissions and any apparent discrepancies. In addition, the data will be reviewed for adherence to the protocol and FDA regulations<sup>66, 67, 68, 74</sup>, the ICH GCP Guideline<sup>75</sup>, and all other applicable regulatory requirements; to resolve any questions arising from the clinical data management review process, data queries and/or center notifications will be sent to the center for completion and then returned to GW or the CRO, as applicable.

2882  
2883

GW's or the CRO's Clinical Data Management Department will correct the following issues in CRFs without any notification to site staff:

2884  
2885  
2886  
2887  
2888  
2889  
2890  
2891  
2892

- Misspellings that do not change the meaning of the word, excluding AEs and medications.
- Date errors that occur at the end of the year and into the New Year.
- Temperature unit errors (Fahrenheit vs Centigrade).
- Weight unit errors (pounds vs kilograms) if a baseline weight has been established.
- Administrative data for example, event names for unscheduled visits or retests.
- Clarifying "other, specify" if data are provided for example, race, physical exam.

2893  
2894  
2895  
2896  
2897  
2898

2899  
2900  
2901  
2902

- If a YES or NO question for example, ‘Were there any AEs?’ is left blank yet AEs are listed on the CRF, YES will be entered in the blank.
- Correct CRF page numbers.

2903  
2904

#### **16.4 Electronic Data collected by Interactive Voice Response System**

2905  
2906  
2907  
2908  
2909

Source data for the assessments collected via the IVRS will be managed by the service provider in accordance with GCP and in adherence to a quality management system. All data will be stored in a secure (for example, redundant hardware, password control, limited physical access to servers), fully audit trailed environment with appropriate industry standard back-up and off-site storage practices.

2910  
2911  
2912

Access for patients providing assessments and investigators will be authenticated and meet industry standards and comply with FDA 21 CFR part 11 (subpart B – Electronic Records) requirements<sup>74</sup>.

2913  
2914  
2915  
2916

After database lock all investigators will receive a certified copy of all the IVRS assessment data. This data will be in an agreed, read-only format with a covering letter explaining the content of the data, a quality statement from the IVRS provider and the investigator’s responsibilities.

2917  
2918  
2919

Regulatory and sponsor auditors will have the ability to review but not modify the IVRS data via an agreed means of access.

2920  
2921

#### **16.5 Quality Assurance**

2922  
2923  
2924  
2925  
2926  
2927  
2928

In accordance with the FDA regulations, EU Clinical Trials Directive/ICH GCP and the sponsor’s audit plans, representatives from GW’s Clinical Quality Assurance Department may select this study for audit. Inspection of site facilities for example, pharmacy, drug storage areas, laboratories and review of study related records will occur to evaluate the study conduct and compliance with the protocol, as per the EU Clinical Trials Directive/ICH GCP and applicable regulatory requirements.

2929  
2930

#### **16.6 Compensation**

2931  
2932  
2933  
2934  
2935

GW will indemnify the investigator and the study site in the event of any claim in respect of personal injury arising due to a patient’s participation in the study, providing that the study protocol has been adhered to. This would include claims arising out of or relating to the administration of the IMP or any clinical intervention or procedure provided for or required by the protocol to which the clinical study

2936  
2937  
2938  
2939  
2940  
2941

patient would not otherwise have been exposed providing there is no evidence of negligence on behalf of the investigator or their team. GW will not be liable for any claims arising from negligence on the part of the investigator or their team.

2945

## 2946 **16.7 Publication Policy**

2947  
2948

GW recognizes that there is a responsibility under the regulatory guidelines to ensure that results of scientific interest arising from this clinical study are appropriately published and disseminated. They will co-ordinate this dissemination and may solicit input and assistance from the chief/PIs. A summary of the results of this study will be made available on <http://www.ClinicalTrials.gov>, as required by U.S. Law.

2949  
2950  
2951  
2952

The raw data from this study may be obtained by the PIs or by their steering committee representatives on request. Should they wish, PIs are allowed to conduct their own analysis and are permitted to present such information along with methods and results of the clinical study at symposia, national or regional professional meetings, and to publish it in theses or dissertations.

2953  
2954  
2955  
2956  
2957

All publications e.g., manuscripts, abstracts, oral/slide presentations or book chapters based on this study, must be submitted to GW Medical Writing Department and, as applicable, GW Publication Committee for review before release. To ensure adequate time for GW to make comments and suggestions where pertinent, all such material should be submitted to them at least 60 days prior to the date for submission for publication, public dissemination, or review by a publication committee. The PIs must then incorporate all reasonable comments made by GW into the publication.

2958  
2959  
2960  
2961  
2962  
2963  
2964

GW also reserve the right to delay the submission of such information by a period of up to six months from the date of first submission to them in order to allow them to take steps to protect proprietary information where applicable.

2965  
2966  
2967  
2968

## 2969 **16.8 Intellectual Property Rights**

2970  
2971  
2972  
2973  
2974  
2975

All Intellectual Property Rights owned by or licensed to either GW or the PIs, other than those arising from the clinical study, will remain their property. All Intellectual Property Rights arising out of the clinical study will vest in or be exclusively licensed to GW and as such, the PI should promptly disclose all knowledge to GW and refrain from using such knowledge without the prior written consent of GW.

2976  
2977  
2978  
2979  
2980  
2981

## **16.9 Confidential Information**

2982  
2983  
2984  
2985  
2986  
2987  
2988

GW and the PI should ensure that only personnel directly concerned with the study should be party to confidential information and that any information coming to either party about the other during the course of the study should be kept strictly confidential and should not be disclosed to any third party or made use of without the prior written consent of the other.

2989  
2990  
2991  
2992  
2993  
2994

2995

## 17 REFERENCES

- 2996 <sup>1</sup> Hurst DL. Epidemiology of severe myoclonic epilepsy of infancy. *Epilepsia* 1990;31(4):397–400.
- 2997
- 2998 <sup>2</sup> Yakoub M, Dulac O, Jambaqué I, Chiron C, Plouin P. Early diagnosis of severe myoclonic epilepsy in infancy. *Brain Dev* 1992;14(5):299–303.
- 2999
- 3000 <sup>3</sup> Durá-Travé T, Yoldi-Petri ME, Gallinas-Victoriano F. Epilepsy in children in Navarre, Spain: epileptic seizure types and epileptic syndromes. *J Child Neurol* 2007;22(7):823–8.
- 3001
- 3002
- 3003 <sup>4</sup> Arzimanoglou A. Dravet syndrome: from electroclinical characteristics to molecular biology. *Epilepsia* 2009;50(Suppl 8):3–9.
- 3004
- 3005 <sup>5</sup> Dravet C. The core Dravet syndrome phenotype. *Epilepsia* 2011;52(Suppl 2):3–9.
- 3006 <sup>6</sup> Dravet C, Oguni H. Dravet syndrome (severe myoclonic epilepsy in infancy). *Handb Clin Neurol* 2013;111:627–33.
- 3007
- 3008 <sup>7</sup> Kanazawa O. Medically intractable generalized tonic-clonic or clonic seizures in infancy. *J Epilepsy* 1992;5(3):143–8.
- 3009
- 3010 <sup>8</sup> Claes L, Del-Favero J, Ceulemans B, Lagae L, Van Broeckhoven C, De Jonghe P. De novo mutations in the sodium-channel gene SCN1A cause severe myoclonic epilepsy of infancy. *Am J Hum Genet* 2001;68(6):1327–32.
- 3011
- 3012
- 3013 <sup>9</sup> Mulley JC, Nelson P, Guerrero S, Dibbens L, Iona X, McMahon JM et al. A new molecular mechanism for severe myoclonic epilepsy of infancy: exonic deletions in SCN1A. *Neurol* 2006;67(6):1094–5.
- 3014
- 3015
- 3016 <sup>10</sup> Madia F, Striano P, Gennaro E, Malacarne M, Paravidino R, Biancheri R et al. Cryptic chromosome deletions involving SCN1A in severe myoclonic epilepsy of infancy. *Neurol* 2006;67(7):1230–5.
- 3017
- 3018
- 3019 <sup>11</sup> Suls A, Claeys KG, Goossens D, Harding B, Van Luijk R, Scheers S et al. Microdeletions involving the SCN1A gene may be common in SCN1A-mutation-negative SMEI patients. *Hum Mutat* 2006;27(9):914–20.
- 3020
- 3021
- 3022 <sup>12</sup> Depienne C, Trouillard O, Saint-Martin C, Gourfinkel-An I, Bouteiller D, Carpentier W et al. Spectrum of SCN1A gene mutations associated with Dravet syndrome: analysis of 333 patients. *J Med Genet* 2009;46(3):183–91.
- 3023
- 3024
- 3025 <sup>13</sup> Nakayama T, Ogiwara I, Ito K, Kaneda M, Mazaki E, Osaka H et al. Deletions of SCN1A 5' genomic region with promoter activity in Dravet syndrome. *Hum Mutat* 2010;31(7):820–9.
- 3026
- 3027
- 3028 <sup>14</sup> SCN1A Mutation Database. Department of Molecular Genetics, University of Antwerp. 22 Jun 2011. <http://www.molgen.vib-ua.be/scn1amutations/Statistics/Mutations.cfm> (accessed on 17 March 2014).
- 3029
- 3030
- 3031 <sup>15</sup> Fujiwara T, Sugawara T, Mazaki-Miyazaki E, Takahashi Y, Fukushima K, Watanabe M et al. Mutations of sodium channel alpha subunit type 1 (SCN1A) in intractable childhood epilepsies with frequent generalized tonic-clonic seizures. *Brain* 2003;126(Pt 3):531–46.
- 3032
- 3033
- 3034

3035  
3036  
3037  
3038  
3039  
3040

- 3041 16 Nabbout R, Gennaro E, Dalla Bernardina B, Dulac O, Madia F, Bertini E et al.  
3042 Spectrum of SCN1A mutations in severe myoclonic epilepsy of infancy. *Neurol*  
3043 2003;60(12):1961–7.
- 3044 17 Kimura K, Sugawara T, Mazaki-Miyazaki E, Hoshino K, Nomura Y, Tateno A et  
3045 al. A missense mutation in SCN1A in brothers with severe myoclonic epilepsy in  
3046 infancy (SMEI) inherited from a father with febrile seizures. *Brain Dev*  
3047 2005;27(6):424–30.
- 3048 18 Akiyama M, Kobayashi K, Ohtsuka Y. Dravet syndrome: a genetic epileptic  
3049 disorder. *Acta Med Okayama* 2012;66(5):369–76.
- 3050 19 Gennaro E, Santorelli FM, Bertini E, Buti D, Gaggero R, Gobbi G et al. Somatic  
3051 and germline mosaicisms in severe myoclonic epilepsy of infancy. *Biochem*  
3052 *Biophys Res Commun* 2006;341(2):489–93.
- 3053 20 Morimoto M, Mazaki E, Nishimura A, Chiyonobu T, Sawai Y, Murakami A et al.  
3054 SCN1A mutation mosaicism in a family with severe myoclonic epilepsy in  
3055 infancy. *Epilepsia* 2006;47(10):1732–6.
- 3056 21 Guerrini R, Cellini E, Mei D, Metitieri T, Petrelli C, Pucatti D et al. Variable  
3057 epilepsy phenotypes associated with a familial intragenic deletion of the SCN1A  
3058 gene. *Epilepsia* 2010;51(12):2474–7.
- 3059 22 Suls A, Velizarova R, Yordanova I, Deprez L, Van Dyck T, Wauters J et al. Four  
3060 generations of epilepsy caused by an inherited microdeletion of the SCN1A gene.  
3061 *Neurol* 2010;75(1):72–6.
- 3062 23 Ohmori I, Ouchida M, Miki T, Mimaki N, Kiyonaka S, Nishiki T et al. A  
3063 CACNB4 mutation shows that altered Ca(v)2.1 function may be a genetic  
3064 modifier of severe myoclonic epilepsy in infancy. *Neurobiol Dis* 2008;32(3):349–  
3065 54.
- 3066 24 Singh NA, Pappas C, Dahle EJ, Claes LRF, Pruess TH, De Jonghe P et al. A role  
3067 of SCN9A in human epilepsies, as a cause of febrile seizures and as a potential  
3068 modifier of Dravet syndrome. *PLoS Genet* 2009;5(9):e1000649.
- 3069 25 Yu FH, Mantegazza M, Westenbroek RE, Robbins CA, Kalume F, Burton KA et  
3070 al. Reduced sodium current in GABAergic interneurons in a mouse model of  
3071 severe myoclonic epilepsy in infancy. *Nat Neurosci* 2006;9(9):1142–9.
- 3072 26 Ogiwara I, Miyamoto H, Morita N, Atapour N, Mazaki E, Inoue I et al. Nav1.1  
3073 localizes to axons of parvalbumin-positive inhibitory interneurons: a circuit basis  
3074 for epileptic seizures in mice carrying an Scn1a gene mutation. *J Neurosci*  
3075 2007;27(22):5903–14.
- 3076 27 Oakley JC, Kalume F, Yu FH, Scheuer T, Catterall WA. Temperature- and age-  
3077 dependent seizures in a mouse model of severe myoclonic epilepsy in infancy.  
3078 *Proc Natl Acad Sci U S A* 2009;106(10):3994–9.
- 3079 28 Depienne C, Bouteiller D, Keren B, Cheuret E, Poirier K, Trouillard O et al.  
3080 Sporadic infantile epileptic encephalopathy caused by mutations in PCDH19  
3081 resembles Dravet syndrome but mainly affects females. *PLoS Genet*  
3082 2009;5(2):e1000381.



3083  
3084  
3085  
3086  
3087  
3088

- 3089 29 Marini C, Mei D, Parmeggiani L, Norci V, Calado E, Ferrari A et al.  
3090 Protocadherin 19 mutations in girls with infantile-onset epilepsy. *Neurology*  
3091 2010;75(7):646–53.
- 3092 30 Harkin LA, Bowser DN, Dibbens LM, Singh R, Phillips F, Wallace RH et al.  
3093 Truncation of the GABA(A)-receptor gamma2 subunit in a family with  
3094 generalized epilepsy with febrile seizures plus. *Am J Hum Genet* 2002;70(2):530–  
3095 6.
- 3096 31 Patino GA, Claes LRF, Lopez-Santiago L, Slat EA, Dondeti RSR, Chen C et al. A  
3097 functional null mutation of SCN1B in a patient with Dravet syndrome. *J Neurosci*  
3098 2009;29(34):10764–78.
- 3099 32 Shi X, Yasumoto S, Nakagawa E, Fukasawa T, Uchiya S, Hirose S. Missense  
3100 mutation of the sodium channel gene SCN2A causes Dravet syndrome. *Brain Dev*  
3101 2009;31(10):758–62.
- 3102 33 Chiron C. Current therapeutic procedures in Dravet syndrome. *Dev Med Child*  
3103 *Neurol* 2011;53(Suppl 2):16–8.
- 3104 34 Chiron C, Dulac O. The pharmacologic treatment of Dravet syndrome. *Epilepsia*  
3105 2011;52(Suppl 2):72–5.
- 3106 35 Guerrini R, Dravet C, Genton P, Belmonte A, Kaminska A, Dulac O. Lamotrigine  
3107 and seizure aggravation in severe myoclonic epilepsy. *Epilepsia* 1998;39(5):508–  
3108 12.
- 3109 36 Thanh TN, Chiron C, Dellatolas G, Rey E, Pons G, Vincent J et al. Long-term  
3110 efficacy and tolerance of stiripentaol in severe myoclonic epilepsy of infancy  
3111 (Dravet's syndrome) [Article in French]. *Arch Pediatr* 2002;9(11):1120–7.
- 3112 37 Chipaux M, Villeneuve N, Sabouraud P, Desguerre I, Boddaert N, Depienne C et  
3113 al. Unusual consequences of status epilepticus in Dravet syndrome. *Seizure*  
3114 2010;19(3):190–4.
- 3115 38 Tanabe T, Awaya Y, Matsuishi T, Iyoda K, Nagai T, Kurihara M et al.  
3116 Management of and prophylaxis against status epilepticus in children with severe  
3117 myoclonic epilepsy in infancy (SMEI; Dravet syndrome)—a nationwide  
3118 questionnaire survey in Japan. *Brain Dev* 2008;30(10):629–35.
- 3119 39 Lotte J, Haberlandt E, Neubauer B, Staudt M, Kluger GJ. Bromide in patients with  
3120 SCN1A-mutations manifesting as Dravet syndrome. *Neuropediatrics*  
3121 2012;43(1):17–21.
- 3122 40 Perez J, Chiron C, Musial C, Rey E, Blehaut H, d'Athis P et al. Stiripentol:  
3123 efficacy and tolerability in children with epilepsy. *Epilepsia* 1999;40(11):1618–  
3124 26.
- 3125 41 Chiron C, Marchand MC, Tran A, Rey E, d'Athis P, Vincent J et al. Stiripentol in  
3126 severe myoclonic epilepsy in infancy: a randomised placebo-controlled syndrome-  
3127 dedicated trial. *Lancet* 2000;356(9242):1638–42.
- 3128 42 Kassai B, Chiron C, Augier S, Cucherat M, Rey E, Gueyffier F et al. Severe  
3129 myoclonic epilepsy in infancy: a systematic review and a meta-analysis of  
3130 individual patient data. *Epilepsia* 2008;49(2):343–8.

3131  
3132  
3133  
3134  
3135  
3136

- 3137 43 Inoue Y, Ohtsuka Y, Oguni H, Tohyama J, Baba H, Fukushima K et al. Stiripentol  
3138 open study in Japanese patients with Dravet syndrome. *Epilepsia*  
3139 2009;50(11):2362–8.
- 3140 44 Wirrell EC, Laux L, Franz DN, Sullivan J, Saneto RP, Morse RP et al. Stiripentol  
3141 in Dravet syndrome: results of a retrospective U.S. study. *Epilepsia*  
3142 2013;54(9):1595–604.
- 3143 45 Nieto-Barrera M, Candau R, Nieto-Jimenez M, Correa A, del Portal LR.  
3144 Topiramate in the treatment of severe myoclonic epilepsy in infancy. *Seizure*  
3145 2000;9(8):590–4.
- 3146 46 Coppola G, Capovilla G, Montagnini A, Romeo A, Spanò M, Tortorella G et al.  
3147 Topiramate as add-on drug in severe myoclonic epilepsy in infancy: an Italian  
3148 multicenter open trial. *Epilepsy Res* 2002;49(1):45–8.
- 3149 47 Kröll-Seger J, Portilla P, Dulac O, Chiron C. Topiramate in the treatment of  
3150 highly refractory patients with Dravet syndrome. *Neuropediatrics*  
3151 2006;37(6):325–9.
- 3152 48 Striano P, Coppola A, Pezzella M, Ciampa C, Specchio N, Ragona F et al. An  
3153 open-label trial of levetiracetam in severe myoclonic epilepsy of infancy. *Neurol*  
3154 2007;69(3):250–4.
- 3155 49 Cersósimo RO, Bartuluchi M, Fortini S, Soraru A, Pomata H, Caraballo RH.  
3156 Vagus nerve stimulation: effectiveness and tolerability in 64 paediatric patients  
3157 with refractory epilepsies. *Epileptic Disord* 2011;13(4):382–8.
- 3158 50 Zamponi N, Passamonti C, Cappanera S, Petrelli C. Clinical course of young  
3159 patients with Dravet syndrome after vagal nerve stimulation. *Eur J Paediatr*  
3160 *Neurol* 2011;15(1):8–14.
- 3161 51 Caraballo RH, Cersósimo RO, Sakr D, Cresta A, Escobal N, Fejerman N.  
3162 Ketogenic diet in patients with Dravet syndrome. *Epilepsia* 2005;46(9):1539–44.
- 3163 52 Kang HC, Kim YJ, Kim DW, Kim HD. Efficacy and safety of the ketogenic diet  
3164 for intractable childhood epilepsy: Korean multicentric experience. *Epilepsia*  
3165 2005;46(2):272–9.
- 3166 53 Caraballo RH. Nonpharmacologic treatments of Dravet syndrome: focus on the  
3167 ketogenic diet. *Epilepsia* 2011;52(Suppl 2):79–82.
- 3168 54 Nabbout R, Copioli C, Chipaux M, Chemaly N, Desguerre I, Dulac O et al.  
3169 Ketogenic diet also benefits Dravet syndrome patients receiving stiripentol: a  
3170 prospective pilot study. *Epilepsia* 2011;52(7):e54–7.
- 3171 55 Bisogno T, Hanus L, De Petrocellis L, Tchilibon S, Ponde DE, Brandi I et al.  
3172 Molecular targets for cannabidiol and its synthetic analogues: effect on vanilloid  
3173 VR1 receptors and on the cellular uptake and enzymatic hydrolysis of  
3174 anandamide. *Br J Pharmacol.* 2001 Oct;134(4):845–52.
- 3175 56 Whyte LS, Ryberg E, Sims NA, Ridge SA, Mackie K, Greasley PJ et al. The  
3176 putative cannabinoid receptor GPR55 affects osteoclast function in vitro and bone  
3177 mass in vivo. *Proc Natl Acad Sci U S A* 2009;106(38):16511–6.

3178  
3179  
3180  
3181  
3182  
3183

- 3184 <sup>57</sup> Pertwee RG. The pharmacology and therapeutic potential of cannabidiol. In: Di  
3185 Marzo V, editor. *Cannabinoids*. New York: Kluwer Academic/Plenum publishers;  
3186 2004. p. 32–83.
- 3187 <sup>58</sup> Zuardi AW, Morais SL, Guimarães FS, Mechoulam R. Antipsychotic effect of  
3188 cannabidiol. *J Clin Psychiatry* 1995;56(10):485–6.
- 3189 <sup>59</sup> Cortesi M, Fusar-Poli P. Potential therapeutical effects of cannabidiol in children  
3190 with pharmaco-resistant epilepsy. *Med Hypotheses* 2007;68(4):920–1.
- 3191 <sup>60</sup> Porter BE, Jacobson C. Report of a parent survey of cannabidiol-enriched  
3192 cannabis use in pediatric treatment-resistant epilepsy. *Epilepsy Behav*  
3193 2013;29(3):574–7.
- 3194 <sup>61</sup> Committee for medicinal products for human use. Guideline on clinical  
3195 investigation of medicinal products in the treatment of epileptic disorders.  
3196 CHMP/EWP/566/98 Rev.2/Corr. 22 July 2010.
- 3197 <sup>62</sup> GWMD09112 Clinical Study Report. A randomized, partially-blind, placebo-  
3198 controlled, pilot, dose-ranging study to assess the effect of Cannabidiol (CBD) on  
3199 liver fat levels in subjects with fatty liver disease. 28 November 2013.
- 3200 <sup>63</sup> Investigator Brochure—CBD Medicine. GW Pharma Ltd, August 2013, Edition  
3201 6.
- 3202 <sup>64</sup> Topic M 3 Non-Clinical Safety Studies for the Conduct of Human Clinical Trials  
3203 for Pharmaceuticals Note for Guidance on Non-Clinical Safety Studies for the  
3204 Conduct of Human Clinical Trials for Pharmaceuticals (CPMP/ICH/286/95—  
3205 Mod) November 2000.
- 3206 <sup>65</sup> World Medical Association Declaration of Helsinki. Ethical Principles for  
3207 Medical Research Involving Human Subjects, October 2013, Fortaleza.
- 3208 <sup>66</sup> FDA 21 CFR Part 50 (Protection of Human Subjects). 01 April 2014
- 3209 <sup>67</sup> FDA 21 CFR Part 312 (Investigational New Drug Application). 01 April 2014.
- 3210 <sup>68</sup> FDA 21 CFR Part 56 (Institutional Review Boards). 01 April 2014.
- 3211 <sup>69</sup> The Directive 2001/20/EC of the European Parliament and of Council of 04 April  
3212 2001.
- 3213 <sup>70</sup> Guidance for Clinical Investigators, Sponsors, and IRBs. Adverse Event  
3214 Reporting for IRBs—Improving Human Subject Protection. FDA January 2009.
- 3215 <sup>71</sup> UK Statutory Instrument No.1031, The Medicines for Human Use (Clinical  
3216 Trials) Regulations 2004 (Available on file at GW).
- 3217 <sup>72</sup> UK Statutory Instrument No.1928, The Medicines for Human Use (Clinical  
3218 Trials) Amendment Regulations 2006 (Available on file at GW).
- 3219 <sup>73</sup> UK Statutory Instrument No.1031, The Medicines for Human Use (Clinical  
3220 Trials) Regulations Amendment No2. 2006 (Available on file at GW).
- 3221 <sup>74</sup> FDA 21 CFR Part 11 (Subpart B—Electronic Records). 01 April 2014.
- 3222 <sup>75</sup> ICH Topic E 6 Guideline for Good Clinical Practice. Note for Guidance on Good  
3223 Clinical Practice (CPMP/ICH/135/95) July 1996.

3224  
3225  
3226  
3227  
3228  
3229

3230  
3231

<sup>76</sup> The Directive 2005/28/EC of the European Parliament and of Council of 09 April 2005. Chapter 4 Trial Master File and Archiving Article 16.

## APPENDIX 1. SCHEDULE OF ASSESSMENTS

| Visit Number                                                                                           | 1   | 2         | 3          | 4          | 5<br>(Tel.) | 6          | 7<br>(Tel.) | 8          | 9*                        | 10**<br>(Tel.) |
|--------------------------------------------------------------------------------------------------------|-----|-----------|------------|------------|-------------|------------|-------------|------------|---------------------------|----------------|
| Day Number<br>(Visit window)                                                                           | -28 | 1<br>(±3) | 15<br>(±3) | 29<br>(±3) | 43<br>(±3)  | 57<br>(±3) | 71<br>(±3)  | 99<br>(±3) | 100-106<br>or 109<br>(+3) | 137<br>(±3)    |
| Informed consent/assent                                                                                | X   |           |            |            |             |            |             |            |                           |                |
| Eligibility Criteria                                                                                   | X   | X         |            |            |             |            |             |            |                           |                |
| Randomization                                                                                          |     | X         |            |            |             |            |             |            |                           |                |
| Demographics                                                                                           | X   |           |            |            |             |            |             |            |                           |                |
| Medical history                                                                                        | X   |           |            |            |             |            |             |            |                           |                |
| Blood sample for SCNIA analysis <sup>†</sup>                                                           | X   |           |            |            |             |            |             |            |                           |                |
| Vital signs                                                                                            | X   | X         | X          | X          |             | X          |             | X          | X                         |                |
| Postural blood pressure                                                                                | X   | X         |            |            |             |            |             |            |                           |                |
| Physical examination (including<br>height and body weight)                                             | X   | X         | X          | X          |             | X          |             | X          | X                         |                |
| ECG                                                                                                    | X   | X         | X          | X          |             | X          |             | X          |                           |                |
| Clinical laboratory blood sampling                                                                     | X   | X         | X          | X          |             | X          |             | X          |                           |                |
| Clinical laboratory urine sampling<br>(dipstick urinalysis) <sup>§</sup>                               | X   | X         | X          | X          |             | X          |             | X          |                           |                |
| Urine THC screen                                                                                       | X   | X         |            |            |             |            |             | X          |                           |                |
| Serum pregnancy test<br>(if appropriate)                                                               | X   | X         |            |            |             |            |             | X          |                           |                |
| AEs                                                                                                    | X   | X         | X          | X          | X           | X          | X           | X          | X                         | X              |
| Concomitant medications                                                                                | X   | X         | X          | X          | X           | X          | X           | X          | X                         | X              |
| Inpatient epilepsy-related<br>hospitalizations                                                         |     | X         | X          | X          | X           | X          | X           | X          | X                         | X              |
| C-SSRS                                                                                                 | X   | X         | X          | X          |             | X          |             | X          | X                         |                |
| Sleep Disruption 0-10 NRS                                                                              |     | X         | X          | X          |             | X          |             | X          |                           |                |
| EDSS                                                                                                   |     | X         | X          | X          |             | X          |             | X          |                           |                |
| Vineland-II                                                                                            |     | X         | X          | X          |             | X          |             | X          |                           |                |
| CGIC <sup>¶</sup>                                                                                      |     |           | X          | X          |             | X          |             | X          |                           |                |
| QOLCE                                                                                                  |     | X         |            |            |             |            |             | X          |                           |                |
| Cognitive assessment battery                                                                           |     | X         |            |            |             |            |             | X          |                           |                |
| Caregiver Impression of IMP<br>Palatability                                                            |     |           |            |            |             |            |             | X          |                           |                |
| CWS                                                                                                    |     | X         |            |            |             |            |             |            | X                         |                |
| Patient diary review (seizures, AE<br>information, concomitant AEDs,<br>rescue medication, IMP dosing) |     | X         | X          | X          |             | X          |             | X          | X                         |                |
| IVRS Caregiver Training                                                                                | X   |           |            |            |             |            |             |            |                           |                |
| IMP dispensing                                                                                         |     | X         |            | X          |             | X          |             | X          |                           |                |
| Collection of IMP                                                                                      |     |           |            | X          |             | X          |             | X          | X                         |                |
| IMP compliance review                                                                                  |     |           | X          | X          |             | X          |             | X          | X                         |                |
| Study Medication Use and<br>Behavior Survey <sup>#</sup>                                               |     |           |            |            |             |            |             |            | X                         |                |

3232  
3233  
3234  
3235  
3236  
3237  
3238

3239  
3240  
3241  
3242  
3243  
3244

3245 \* Only required for those patients who delay entry into or do not participate in the OLE study or for  
3246 those who withdraw from the study early. Visit 9 should be within seven days of Visit 8 for  
3247 patients delaying entry to the OLE study. For patients who do not participate in the OLE study,  
3248 Visit 9 should be 10 days after Visit 8. Patients who opt not to enter the OLE study must have  
3249 weekly ( $\pm 3$  days) safety telephone calls until Visit 10.  
3250 \*\* For patients who do not enter the OLE study or who withdraw from the study early.  
3251 § Urine sample taken if possible.  
3252 † Sample can be taken at any clinic visit during the study.  
3253 ¶ Caregivers are to compare to the memory aid from Visit 2.  
3254 # To be performed at final dosing visit (Visit 8 or 9, as applicable) for patients 12 years of age and  
3255 older.  
3256 Tel. Visit can be conducted by telephone.

## APPENDIX 2. STUDY PERSONNEL

### Appendix 2.1 Investigator Details

At the time of protocol production, the participating investigators had not been confirmed. A list of all investigators will be maintained within the GW Master Files (electronically and added to the Trial Master File at the end of the study).

### Appendix 2.2 Sponsor Contact Details

Pharmacovigilance Department — SAE Reporting: **Fax:** PPD [REDACTED]

**USA Toll Free Fax:**

PPD [REDACTED]

**Tel:** PPD [REDACTED]

Sponsor:

GW Research Ltd  
Porton Down Science Park  
Salisbury  
Wiltshire SP4 0JQ  
United Kingdom

**Tel:** PPD [REDACTED]

**Fax:** PPD [REDACTED]

Medical Monitor

EU  
PPD [REDACTED]  
[REDACTED]  
**Tel:** PPD [REDACTED]  
**Mobile:** PPD [REDACTED]

USA

PPD [REDACTED]  
[REDACTED]  
**Cell:** PPD [REDACTED]

3292  
3293  
3294  
3295  
3296  
3297

3298 Clinical Project Manager/Clinical Operations

3299 Director: 3302

3300 3303

3304

3305

3306

3307

3308

GW Research Ltd

Sovereign House

Vision Park

Histon

Cambridge CB24 9BZ

United Kingdom

Tel: PPD

Fax: PPD

3309 Clinical Trials Supplies:

3310

3311

GW Pharma Ltd

Tel: PPD

Fax: PPD



3312  
3313  
3314  
3315  
3316  
3317  
3318  
3319  
3320  
3321

## 1.1 Changes in the Conduct of the Trial or Planned Analysis

### 1.1.1 Changes in the Conduct of the Trial

A summary of amendments to the protocol is provided in Table 1.1.1-1. The protocol amendments provide the rationale for each modification to the protocol.

| <b>Amendment Number</b> | <b>Date</b> | <b>Amendment Type</b> | <b>Action</b>                                                                                                                                                                                                                                                                                                                                                                                                                                                                                                                                                                                                                                                                                                                                                                                                                                                                                                                                                                                                                                                                                                                                                                                                                                                                                                                                                                                                                                                                                                                                                                                                                          |
|-------------------------|-------------|-----------------------|----------------------------------------------------------------------------------------------------------------------------------------------------------------------------------------------------------------------------------------------------------------------------------------------------------------------------------------------------------------------------------------------------------------------------------------------------------------------------------------------------------------------------------------------------------------------------------------------------------------------------------------------------------------------------------------------------------------------------------------------------------------------------------------------------------------------------------------------------------------------------------------------------------------------------------------------------------------------------------------------------------------------------------------------------------------------------------------------------------------------------------------------------------------------------------------------------------------------------------------------------------------------------------------------------------------------------------------------------------------------------------------------------------------------------------------------------------------------------------------------------------------------------------------------------------------------------------------------------------------------------------------|
| 1                       | 23 Oct 2014 | Substantial           | <p>This amendment to Protocol Version 1 (creating Protocol Version 2) incorporated additional requirements identified by GW. Key changes included:</p> <ul style="list-style-type: none"> <li>• Adding a secondary objective/endpoint to evaluate change in duration of subtypes of seizures as assessed by the CGICSD.</li> <li>• Clarifying of the exclusion criteria addressing previous and current use of cannabinoids.</li> <li>• Adding collection of a full record of epilepsy-specific genetic testing and prior AEDs taken as part of the patient's medical history for safety assessment and to aid/confirm diagnosis of DS.</li> <li>• Clarifying that IMP usage was to be recorded via the paper diary to reduce the IVRS call time.</li> <li>• Clarifying that the baseline period must be a minimum of 28 days to capture sufficient baseline data.</li> <li>• Clarifying that the safety follow-up period must be a minimum of 28 days after end of treatment to capture sufficient safety data.</li> <li>• Clarifying the subtypes of seizures and definition of "countable partial seizures" to aid identification of seizure types.</li> <li>• Clarifying that the Cognitive Assessment Battery would only be performed at sites that had expertise to conduct the test.</li> <li>• Clarifying that the pre-randomization pregnancy test was to be performed using urine rather than serum to provide an immediate result for assessment of inclusion/exclusion criteria.</li> <li>• Adding the PCWS for children 4–17 years of age.</li> <li>• Correcting minor spelling/formatting/consistency issues.</li> </ul> |
| 2                       | 20 Nov 2014 | Substantial           | <p>This amendment to Protocol Version 2 (creating Protocol Version 3) incorporated additional requirements identified by the Medicines and Healthcare products Regulatory Agency (MHRA) as follows:</p> <ul style="list-style-type: none"> <li>• Clarifying that patients randomized into the trial who were later found to meet criteria for DILI must be withdrawn from the trial.</li> </ul>                                                                                                                                                                                                                                                                                                                                                                                                                                                                                                                                                                                                                                                                                                                                                                                                                                                                                                                                                                                                                                                                                                                                                                                                                                        |
| 3                       | 20 Mar 2015 | Substantial           | <p>This amendment to Protocol Version 3 (creating Protocol Version 4) incorporated additional requirements identified by the FDA and GW. Key changes included:</p> <ul style="list-style-type: none"> <li>• Specifying that patients would be stratified by age across treatment arms.</li> <li>• Adding assessment of growth and development through measurement of height, body weight, serum IGF-1 levels, and Tanner staging.</li> <li>• Adding measurement of effects of menstruation.</li> <li>• Amending the statistical methods for analysis of the primary and secondary endpoints.</li> </ul>                                                                                                                                                                                                                                                                                                                                                                                                                                                                                                                                                                                                                                                                                                                                                                                                                                                                                                                                                                                                                                |

| <b>Amendment Number</b> | <b>Date</b> | <b>Amendment Type</b> | <b>Action</b>                                                                                                                                                                                                                                                                                                                                                                                                                                                                                                                                                                                                                                                                                                                                                                                                                                                                                                                                                                                                                                                                                                                                                                                                                                                                                                                                                                                                                                                                                                                                                                                                                                                                                                                                                                                                                                                                                                                                                                                                                                                                                                                                                                                                                                                                                      |
|-------------------------|-------------|-----------------------|----------------------------------------------------------------------------------------------------------------------------------------------------------------------------------------------------------------------------------------------------------------------------------------------------------------------------------------------------------------------------------------------------------------------------------------------------------------------------------------------------------------------------------------------------------------------------------------------------------------------------------------------------------------------------------------------------------------------------------------------------------------------------------------------------------------------------------------------------------------------------------------------------------------------------------------------------------------------------------------------------------------------------------------------------------------------------------------------------------------------------------------------------------------------------------------------------------------------------------------------------------------------------------------------------------------------------------------------------------------------------------------------------------------------------------------------------------------------------------------------------------------------------------------------------------------------------------------------------------------------------------------------------------------------------------------------------------------------------------------------------------------------------------------------------------------------------------------------------------------------------------------------------------------------------------------------------------------------------------------------------------------------------------------------------------------------------------------------------------------------------------------------------------------------------------------------------------------------------------------------------------------------------------------------------|
|                         |             |                       | <ul style="list-style-type: none"> <li>• Adding blood sampling for PK analyses of CBD and its major metabolites.</li> <li>• Adding measurement of serum triglycerides in clinical laboratory assessments.</li> <li>• Clarifying that Visit 8 ('End of Treatment' visit) would also be labeled as the Withdrawal visit.</li> <li>• Adding ECG and clinical laboratory assessments at the 'End of Taper' visit for patients who withdrew early and tapered IMP and for patients who opted not to enter the OLE trial.</li> <li>• Updating contact details in line with a change in GW's business address.</li> <li>• Increasing the number of patients per treatment group from 40 to 50 (a total increase from 120 to 150 patients) and amending the assumption that patients in the placebo group would experience a mean reduction in convulsive seizure frequency of 10% to 18%.</li> <li>• Clarifying the eligibility criterion regarding contraception requirements in line with recommendations related to contraception and pregnancy testing in clinical trials.</li> <li>• Adding an eligibility criterion excluding patients taking felbamate for &lt; 1 year. Felbamate was also listed as a prohibited therapy if taken for &lt; 1 year.</li> <li>• Clarifying the use of the ESC to verify each patient's seizure subtypes and diagnosis of DS.</li> <li>• Amending wording to allow patients who suspended IMP dosing due to an AE to resume dosing prior to complete recovery, provided that the AE was well tolerated.</li> <li>• Adding secondary endpoints to align the protocol with the OLE trial and editing the primary and secondary endpoints to clarify that the total number of convulsive and non-convulsive seizures would be measured.</li> <li>• Clarifying when the Cognitive Assessment Battery should be administered.</li> <li>• Clarifying that even though patients may achieve their target dose before the end of the 2-week titration period, the titration period was 2-weeks to ensure that all patients achieved stable dosing.</li> <li>• Assimilating text from Section 12.3.1 to Section 12.8 to avoid repetition.</li> <li>• Clarifying text for improved readability.</li> <li>• Correcting minor spelling/formatting/consistency issues.</li> </ul> |
| 4                       | 29 May 2015 | Not submitted         | This amendment to Protocol Version 4 (creating Protocol Version 5) incorporated additional requirements identified by the FDA and GW. However, due to subsequent recommendations received from the FDA, Protocol Amendment 4 and corresponding Protocol Version 5 were not submitted to any competent authority or IRB/IEC and hence Protocol Version 5 was never implemented at any trial sites.                                                                                                                                                                                                                                                                                                                                                                                                                                                                                                                                                                                                                                                                                                                                                                                                                                                                                                                                                                                                                                                                                                                                                                                                                                                                                                                                                                                                                                                                                                                                                                                                                                                                                                                                                                                                                                                                                                  |
| 5                       | 29 Jun 2015 | Substantial           | <p>This amendment to Protocol Version 4 (creating Protocol Version 6) incorporated additional requirements identified by the FDA and GW. Key changes included:</p> <ul style="list-style-type: none"> <li>• Updating statistical analyses of the primary and secondary endpoints to include the full treatment period (titration plus maintenance period).</li> <li>• Including further details of statistical methods.</li> </ul>                                                                                                                                                                                                                                                                                                                                                                                                                                                                                                                                                                                                                                                                                                                                                                                                                                                                                                                                                                                                                                                                                                                                                                                                                                                                                                                                                                                                                                                                                                                                                                                                                                                                                                                                                                                                                                                                 |

| <b>Table 1.1.1-1 Protocol Amendments and Administrative Changes</b> |             |                       |                                                                                                                                                                                                                                                                                                                                                                                                                                                                                                                                                                                                                                                                                                                                                                                                                                                                                                                                                                                                                                                                                                                                                                                                                                                                                                                                                                                                                                                                                                                                                                                                                                                                                                                                                                                                                                                                                                                                                                                                                                                                                                                                                                                                                                                                                                                                                                                                                                                                                                                                                                                                          |
|---------------------------------------------------------------------|-------------|-----------------------|----------------------------------------------------------------------------------------------------------------------------------------------------------------------------------------------------------------------------------------------------------------------------------------------------------------------------------------------------------------------------------------------------------------------------------------------------------------------------------------------------------------------------------------------------------------------------------------------------------------------------------------------------------------------------------------------------------------------------------------------------------------------------------------------------------------------------------------------------------------------------------------------------------------------------------------------------------------------------------------------------------------------------------------------------------------------------------------------------------------------------------------------------------------------------------------------------------------------------------------------------------------------------------------------------------------------------------------------------------------------------------------------------------------------------------------------------------------------------------------------------------------------------------------------------------------------------------------------------------------------------------------------------------------------------------------------------------------------------------------------------------------------------------------------------------------------------------------------------------------------------------------------------------------------------------------------------------------------------------------------------------------------------------------------------------------------------------------------------------------------------------------------------------------------------------------------------------------------------------------------------------------------------------------------------------------------------------------------------------------------------------------------------------------------------------------------------------------------------------------------------------------------------------------------------------------------------------------------------------|
| <b>Amendment Number</b>                                             | <b>Date</b> | <b>Amendment Type</b> | <b>Action</b>                                                                                                                                                                                                                                                                                                                                                                                                                                                                                                                                                                                                                                                                                                                                                                                                                                                                                                                                                                                                                                                                                                                                                                                                                                                                                                                                                                                                                                                                                                                                                                                                                                                                                                                                                                                                                                                                                                                                                                                                                                                                                                                                                                                                                                                                                                                                                                                                                                                                                                                                                                                            |
|                                                                     |             |                       | <ul style="list-style-type: none"> <li>• Updating the lower age limit for Tanner Staging to include adolescent patients aged 10–17 (inclusive) or earlier if clinically indicated by the onset of menarche or other signs of precocious puberty.</li> <li>• Clarifying that during the follow-up of patients with potential cases of DILI, levels of ALT, AST, TBL and ALP should be monitored until levels normalize (in the investigators opinion) or return to normal.</li> <li>• Removing references to “High Dose Level” and “Low Dose Level” and replaced with “20 mg/kg/day” and “10/mg/kg/day” respectively in line with the DSMC recommendation from trial GWEP1332 Part A.</li> <li>• Replacing wording of concomitant AED blood sampling in the event of an AE with a secondary objective/endpoint requesting the investigator monitor plasma concomitant AED levels and discuss results with the GW medical monitor. Samples were only to be taken if the risk/benefit outcome was favorable, in the investigator’s opinion.</li> <li>• Reclassifying effects on menstruation as a safety measure.</li> <li>• Amending responder and sensitivity analyses to state the average number of seizures per 28 days rather than per week.</li> <li>• Clarifying the convulsive seizure inclusion criterion to state that only the first 28 days of the baseline period counted towards a patient’s eligibility.</li> <li>• Removing the Socioeconomic Scale test item (parent measure) from the Cognitive Assessment Battery as it was not possible to standardize this endpoint across different countries.</li> <li>• Clarifying liver function testing regarding follow-up of elevated liver enzyme levels that do not meet the criteria for DILI.</li> <li>• Clarifying eligibility criteria for impaired hepatic function in line with the criteria for DILI.</li> <li>• Adding a compliance statement, setting out a minimum number of days a patient needed to complete the IVRS diary during baseline to be eligible for the trial.</li> <li>• Clarifying blood sampling for PK was only to be taken from patients weighing <math>\geq 20</math> kg. Sampling times and windows were also clarified.</li> <li>• Updating references to ‘baseline observation period’ as ‘baseline period’.</li> <li>• Clarifying the age restriction for C-SSRS suitability to include consideration of developmental delays as well as age.</li> <li>• Adding paper diary entry of seizure counts over 99.</li> <li>• Amending ‘Ethnic origin’ to ‘race’. for consistency within the protocol.</li> </ul> |
| 6                                                                   | 23 Feb 2017 | Substantial           | <p>This amendment to Protocol Version 6 (creating Protocol Version 7) incorporated additional requirements identified by GW. Key changes included:</p> <ul style="list-style-type: none"> <li>• Increasing the number of patients per treatment group from 50 to 62 (a total increase from 150 to 186 patients).</li> <li>• Changing the statistical analyses of seizure data to use nonparametric rather than parametric methods.</li> </ul>                                                                                                                                                                                                                                                                                                                                                                                                                                                                                                                                                                                                                                                                                                                                                                                                                                                                                                                                                                                                                                                                                                                                                                                                                                                                                                                                                                                                                                                                                                                                                                                                                                                                                                                                                                                                                                                                                                                                                                                                                                                                                                                                                            |

3328  
3329  
3330

| <b>Amendment Number</b> | <b>Date</b> | <b>Amendment Type</b> | <b>Action</b>                                                                                                                                                                                                                                                                                                                                                                                                                                                                                                                                                                                                                                                                                                                                                                                                                                                                                                                                                                                                                                                                                                                                               |
|-------------------------|-------------|-----------------------|-------------------------------------------------------------------------------------------------------------------------------------------------------------------------------------------------------------------------------------------------------------------------------------------------------------------------------------------------------------------------------------------------------------------------------------------------------------------------------------------------------------------------------------------------------------------------------------------------------------------------------------------------------------------------------------------------------------------------------------------------------------------------------------------------------------------------------------------------------------------------------------------------------------------------------------------------------------------------------------------------------------------------------------------------------------------------------------------------------------------------------------------------------------|
|                         |             |                       | <ul style="list-style-type: none"> <li>• Adding assessments of plasma and urine concentrations of THC and its major metabolites, and urine concentrations of CBD and its major metabolites.</li> <li>• Amending the PK parameters to allow for accurate determination of the defined parameters.</li> <li>• Adding instructions for patients to record the time of meals the day before and the day of PK sampling.</li> <li>• Clarifying that any clinical symptoms of concern resulting from possible drug-drug interactions should be discussed with the GW medical monitor and if required, adjustments to AEDs will be permitted.</li> <li>• Broadening the mode of IMP administration to encompass patients who have difficulty swallowing.</li> </ul>                                                                                                                                                                                                                                                                                                                                                                                                |
| 7                       | 06 Sep 2018 | Non-substantial       | <p>This amendment to Protocol Version 7 (creating Protocol Version 8) incorporated additional requirements identified by GW. Key changes included:</p> <ul style="list-style-type: none"> <li>• Updating the primary analysis method from the Wilcoxon rank-sum test to a negative binomial regression analysis.</li> <li>• Removing the words “percentage change” from the primary endpoint wording and for percentage change in other seizure types under secondary endpoints throughout the protocol.</li> <li>• Adding the replaced Wilcoxon rank-sum test primary analysis as a sensitivity analysis.</li> <li>• Updating other sensitivity analyses from Wilcoxon rank-sum tests to negative binomial regression analyses.</li> <li>• Amending the treatment allocation ratio to clarify that patients were allocated to one of 4 treatment groups (GWP42003-P 10 mg/kg/day, GWP42003-P 20 mg/kg/day, placebo 10 mg/kg/day dose volume equivalent, or placebo 20 mg/kg/day dose volume equivalent) at a 2:2:1:1 ratio, and that the 2 placebo groups will be pooled for the analyses of efficacy. The planned sample size was not changed.</li> </ul> |

3331 Source: [Appendix 1.1](#), Protocol amendments.3332 **1.1.2 Changes in the Planned Analyses**

3333

- 3334
- The identification of 3 key secondary endpoints and the hierarchical testing procedure were not defined in the protocol but were included in the SAP prior to unblinding.
- 3335
- Upon blinded review of IVRS data for the number of convulsive seizures greater than 30 minutes in duration and the number of non-convulsive seizures greater than 30 minutes in duration, it was determined that there were insufficient numbers of patients reporting these seizures to perform the analyses planned in the protocol.
- 3336
- Upon blinded review of the number of patients with inpatient epilepsy-related hospitalizations, it was determined that there were insufficient numbers of patients to perform the analyses planned in the protocol.
- 3337
- 3338
- 3339
- 3340
- 3341
- 3342

3343  
3344  
3345  
3346  
3347  
3348  
3349  
3350  
3351  
3352  
3353  
3354  
3355  
3356  
3357  
3358  
3359  
3360  
3361  
3362  
3363  
3364  
3365  
3366  
3367  
3368  
3369  
3370  
3371  
3372  
3373  
3374  
3375  
3376  
3377

- The protocol included change from baseline in usage of rescue medication as an efficacy endpoint. However, due to inconsistencies in the collection of these data, no analyses were performed.
- The endpoint planned in the protocol of number of patients experiencing a > 25% worsening, - 25 to + 25% no change, 25 – 50% improvement, 50 – 75% improvement or > 75% improvement in convulsive seizures from baseline was updated in the SAP to the following:
  - Number of patients experiencing a > 25% increase,  $\geq 0$  to  $\leq 25\%$  increase, > 0 to < 25% reduction,  $\geq 25$  to < 50% reduction,  $\geq 50$  to < 75% reduction, or  $\geq 75\%$  reduction from baseline in convulsive seizure frequency.
- The protocol included determination of THC, CBD, and their major metabolites in urine after multiple doses of GWP42003-P. However, none of the consented patients were able to provide a urine sample so no analyses were performed.
- The IVRS system was designed to allow caregivers to report a maximum of 99 seizures per day for any individual seizure type since this was considered adequate during the trial design process. However, during the trial some caregivers reported that for some individual seizure types the patient was experiencing more than 99 per day. As described in Section 5.5.2 of the SAP ([Appendix 1.9](#)) a '> 99 seizure log' was introduced into to the CRF. If a caregiver's patient experienced > 99 of any individual seizure type, they were instructed to enter '99' into the IVRS and then record the actual number into the paper diary so it could be added to the CRF at the next clinic visit. This process was followed at some sites; however, for many sites the actual number of seizures was not provided by the caregiver. It was agreed that for any entries of '99' within the IVRS where the actual number was not provided by the caregiver the seizure count would remain as 99.

The data showed that only 1 patient, randomized to placebo, recorded 99 for a convulsive seizure type (1 instance of 99 tonic-clonic seizures reported on Day 37). When reviewing the ePRO data profile for this patient it appears the entry should have been 9 and not 99, however this cannot be confirmed so 99 has been reported ([Appendix 2; Listing 8.1.1](#)). It has been concluded that this process did not change the interpretation of the primary endpoint.

3378

**GW Research Ltd.**

3379

**Study Code: GWEP1424**

3380

3381 **A RANDOMIZED, DOUBLE-BLIND, PLACEBO-CONTROLLED STUDY TO**  
3382 **INVESTIGATE THE EFFICACY AND SAFETY OF CANNABIDIOL**  
3383 **(GWP42003-P) IN CHILDREN AND YOUNG ADULTS WITH DRAVET**  
3384 **SYNDROME**

3385

**Statistical Analysis Plan**

3386

05 October 2018

3387

3388

3389

3390

3391

3392

**CONTENTS**

3393

**1. Introduction 115**

3394

1.1 Rationale 115

3395

**2. Study Objectives 115**

3396

2.1 Primary 115

3397

2.2 Secondary 115

3398

**3. Investigational Plan 115**

3399

3.1 Study Design 115

3400

3.2 Definition of Sample Size 116

3401

3.3 Efficacy and Safety Endpoints 117

3402

3.3.1 Primary Efficacy Endpoint 117

3403

3.3.2 Secondary Efficacy Endpoints 117

3404

3.3.3 Safety Variables 118

3405

**4. Blinded Data Review Meeting 118**

3406

**5. Statistical Methods 119**

3407

5.1 General Considerations 119

3408

5.1.1 Missing Data 120

3409

5.1.2 Day Numbering 120

3410

5.1.3 Definitions 121

3411

5.2 Analysis Sets and Protocol Deviations 121

3412

5.2.1 Safety Analysis Set 121

3413

5.2.2 Intention to Treat Analysis Set 122

3414

5.2.3 Per Protocol Analysis Set and Protocol Deviations 122

3415

5.3 Listings 122

3416

5.4 Demographic Data and Patient Characteristics 122

3417

5.4.1 Patient Disposition 122

3418

5.4.2 Analysis Sets 123

3419

5.4.3 Demographic Data and Baseline Characteristics 123

3420

5.4.4 Epilepsy and Dravet Syndrome History 124

3421

5.4.5 Medical and Surgical History and Current Medical Conditions 125

3422

5.5 Efficacy Analysis 125

3423

5.5.1 General Approach 125

3424

5.5.2 Primary Efficacy Endpoint 126

3425

5.5.3 Secondary Efficacy Endpoints 130

3426

5.5.4 Exploratory Efficacy Endpoints 139

3427

5.5.5 Subgroup Analyses 140

3428

5.6 Safety Evaluation 141

3429

5.6.1 Exposure to IMP 141

3430

5.6.2 Adverse Events 141

3431

5.6.3 Clinical Laboratory Evaluation 144

3432

5.6.4 Vital Signs, Other Physical Findings and Other Safety Data 146

3433

5.7 Other Measures 149

3434

5.7.1 Concomitant Medication 149

3435

5.7.2 Plasma Concentrations of Concomitant Antiepileptic Drugs 149

|      |                                              |                                                                        |            |
|------|----------------------------------------------|------------------------------------------------------------------------|------------|
| 3436 | 5.7.3                                        | Caregiver Impression of Investigational Medicinal Product Palatability |            |
| 3437 | 150                                          |                                                                        |            |
| 3438 | 5.7.4                                        | Study Medication Use and Behavior Survey                               | 150        |
| 3439 | 5.7.5                                        | Supplemental Drug Accountability Form                                  | 150        |
| 3440 | 5.7.6                                        | Supplemental Adverse Event Form                                        | 150        |
| 3441 | 5.7.7                                        | Site Classification Form                                               | 151        |
| 3442 | 5.7.8                                        | IVRS Compliance                                                        | 151        |
| 3443 | 5.7.9                                        | Meal Times                                                             | 151        |
| 3444 | 5.8                                          | Changes in the Conduct of the Study or Planned Analysis                | 152        |
| 3445 | <b>6.</b>                                    | <b>References</b>                                                      | <b>152</b> |
| 3446 | <b>7.</b>                                    | <b>Amendments</b>                                                      | <b>153</b> |
| 3447 | <b>8.</b>                                    | <b>Attachments and Appendices</b>                                      | <b>154</b> |
| 3448 | <b>Appendix 1</b>                            | <b>Adverse Events of Special Interest – Abuse Liability</b>            |            |
| 3449 | <b>154</b>                                   |                                                                        |            |
| 3450 | <b>Appendix 2</b>                            | <b>Ranges for Clinically Significant Changes and Other</b>             |            |
| 3451 | <b>Defined Flagged Values in Vital Signs</b> | <b>155</b>                                                             |            |
| 3452 | <b>Appendix 3</b>                            | <b>Defined Flagged Values in ECG Parameters</b>                        | <b>155</b> |
| 3453 | <b>Appendix 4</b>                            | <b>Toxicity Criteria for Laboratory Parameters</b>                     | <b>155</b> |
| 3454 | <b>Appendix 5</b>                            | <b>List of Tables, Listings and Figures</b>                            | <b>157</b> |
| 3455 |                                              |                                                                        |            |



3456

**ABBREVIATION**

|        |   |                                                           |
|--------|---|-----------------------------------------------------------|
| ADHD   | - | Attention Deficit Hyperactivity Disorder                  |
| AEDs   | - | Antiepileptic Drugs                                       |
| AEs    | - | Adverse Events                                            |
| ALQ    | - | Above Limit of Quantification                             |
| ALT    | - | Alanine Aminotransferase                                  |
| ANCOVA | - | Analysis of Covariance                                    |
| AST    | - | Aspartate Aminotransferase                                |
| ATC    | - | Anatomical Therapeutic Chemical                           |
| BASC-2 | - | Behavior Assessment System for Children – Second Edition  |
| BDRM   | - | Blinded Data Review Meeting                               |
| BLQ    | - | Below Limit of Quantification                             |
| BSA    | - | Body Surface Area                                         |
| CGIC   | - | Caregiver Global Impression of Change                     |
| CGICSD | - | Caregiver Global Impression of Change in Seizure Duration |
| CI     | - | Confidence Interval                                       |
| CMH    | - | Cochran–Mantel–Haenszel                                   |
| CRF    | - | Case Report Form                                          |
| C-SSRS | - | Columbia-Suicide Severity Rating Scale                    |
| CWS    | - | Cannabis Withdrawal Scale                                 |
| D-KEFS | - | Delis–Kaplan Executive Function System                    |
| DS     | - | Dravet Syndrome                                           |
| ECG    | - | Electrocardiogram                                         |
| EDSS   | - | Epworth Daytime Sleepiness Scale                          |
| EEG    | - | Electroencephalography                                    |
| eGFR   | - | Estimated Glomerular Filtration Rate                      |
| IGF-1  | - | Insulin-like Growth Factor-1                              |
| IMP    | - | Investigational Medicinal Product                         |
| INR    | - | Prothrombin International Normalized Ratio                |
| ITT    | - | Intention to Treat                                        |
| IVRS   | - | Interactive Voice Response System                         |
| LOCF   | - | Last Observation Carried Forward                          |
| MAR    | - | Missing at Random                                         |
| MedDRA | - | Medical Dictionary for Regulatory Activities              |
| MI     | - | Multiple Imputation                                       |
| MNAR   | - | Missing Not at Random                                     |
| NOCB   | - | Next Observation Carried Backward                         |
| NRS    | - | Numerical Rating Scale                                    |
| OLE    | - | Open Label Extension                                      |

|             |   |                                                                       |
|-------------|---|-----------------------------------------------------------------------|
| PCWS        | - | Pediatric Cannabinoid Withdrawal Scale                                |
| PK          | - | Pharmacokinetics                                                      |
| PP          | - | Per Protocol                                                          |
| QOLCE       | - | Quality of Life in Childhood Epilepsy                                 |
| SAP         | - | Statistical Analysis Plan                                             |
| SOC         | - | System Organ Class                                                    |
| TEAE        | - | Treatment Emergent Adverse Event                                      |
| ULN         | - | Upper Limit of Normal                                                 |
| Vineland-II | - | Vineland Adaptive Behavior Scales, Second Edition                     |
| WAIS-4      | - | Wechsler Adult Intelligence Scale - Fourth Edition                    |
| WASI-2      | - | Wechsler Abbreviated Scale of Intelligence – Second Edition           |
| WISC-4      | - | Wechsler Intelligence Scale for Children – Fourth Edition             |
| WPPSI-4     | - | Wechsler Preschool and Primary Scale of Intelligence – Fourth Edition |

## 3458 1. Introduction

3459 This statistical analysis plan (SAP) documents the statistical reporting to be performed for Study  
3460 GWEP1424. Details of the analysis and reporting of pharmacokinetics (PK) of CBD and its major  
3461 metabolites are not included as part of this SAP.

3462 This SAP has been prepared based on the following study documents:

- 3463 • Protocol GWEP1424 (Version 8, dated 06 September 2018).
- 3464 • Case Report Form (CRF) GWEP1424, Version 1 (dated 08 April 2015).

### 3465 1.1 Rationale

3466 Dravet syndrome (DS), also known as severe myoclonic epilepsy in infancy, is a rare form of severe  
3467 epilepsy with onset in early childhood.

3468 DS is characterized by a variety of treatment-resistant seizures (febrile and afebrile, generalized and  
3469 unilateral, clonic or tonic–clonic) that occur in the first year of life and has a poor cognitive  
3470 prognosis.

3471 DS is one of the most pharmacoresistant forms of epilepsy, with all seizure types extremely  
3472 refractory to conventional antiepileptic drugs (AEDs), especially during the first several years.

3473 In this study the active Investigational Medicinal Product (IMP) is GWP42003-P oral solution.

## 3474 2. Study Objectives

3475 The protocol defined the study objectives as:

### 3476 2.1 Primary

3477 To assess the efficacy of GWP42003-P as an adjunctive antiepileptic treatment compared with  
3478 placebo, with respect to the change during the treatment period of the study compared to baseline in  
3479 convulsive seizure frequency. The dose response effect between 2 GWP42003-P Dose Levels (10  
3480 mg/kg/day and 20 mg/kg/day) and placebo will also be explored. Convulsive seizures are defined  
3481 as tonic–clonic, tonic, clonic or atonic and non-convulsive seizures as myoclonic, partial or absence.

### 3482 2.2 Secondary

- 3483 • To assess changes from baseline in non-convulsive seizure frequency, duration, usage of rescue  
3484 medication, number of inpatient hospitalizations due to epilepsy, sleep disruption, daytime sleepiness,  
3485 quality of life, growth and development, and conduct behavioral and cognitive assessments in patients  
3486 taking GWP42003-P as an adjunctive treatment, when compared with placebo.
- 3487 • To determine the PK of CBD and its major metabolites following single and multiple doses of  
3488 GWP42003-P and to assess the presence of  $\Delta^9$ -tetrahydrocannabinol (THC) and its major metabolites  
3489 in plasma and the presence of THC, CBD and their major metabolites in urine after multiple doses of  
3490 GWP42003-P.
- 3491 • To determine effects of GWP42003-P on plasma concentrations of concomitant AEDs, where  
3492 available.
- 3493 • To assess the safety of both GWP42003-P doses when compared with placebo.

## 3494 3. Investigational Plan

### 3495 3.1 Study Design

3496 This study is a randomized, double-blind, 14-week comparison of 2 Dose Levels of GWP42003-P  
3497 (10 mg/kg/day and 20 mg/kg/day) versus placebo. The treatment period will consist of a 2-week

3498 titration period followed by a 12-week maintenance period. The treatment period will be followed  
3499 by a 10-day taper period and a 4-week follow-up period. The study will aim to determine the  
3500 efficacy, safety and tolerability of 2 Dose Levels of GWP42003-P compared with placebo.  
3501 Following study completion, all patients will be invited to continue to receive GWP42003-P in an  
3502 open label extension (OLE) study (under a separate protocol).

### 3503 **3.2 Definition of Sample Size**

3504 A total of 186 patients will be randomized to one of 4 treatment groups (GWP42003-P 10 mg/kg/day,  
3505 GWP42003-P 20 mg/kg/day, placebo 10 mg/kg/day dose volume equivalent, or placebo  
3506 20 mg/kg/day dose volume equivalent) at a 2:2:1:1 ratio. The randomization will be stratified by age  
3507 group (2–5 years, 6–12 years and 13–18 years). The placebo groups will be pooled for the analyses  
3508 of efficacy.

3509 For a Wilcoxon–Mann–Whitney test comparing 2 distributions with a 2-sided significance level of  
3510 0.05, a sample size of 62 per group is required to obtain a power of at least 80%. This is based on a  
3511 gamma distribution for the GWP42003-P groups with scale parameter of 65.614 and shape parameter  
3512 of 1.0886, and a gamma distribution for the placebo group with scale parameter of 40.887 and shape  
3513 parameter of 2.3059.

3514 Maximum likelihood estimates using the Newton–Raphson approximation were computed for the  
3515 scale and shape parameters using data from study GWEP1332 Part B.

### 3516 3.3 Efficacy and Safety Endpoints

#### 3517 3.3.1 Primary Efficacy Endpoint

3518 The primary endpoint is the change in total convulsive seizure frequency during the treatment period  
3519 (Day 1 to the end of the evaluable period) compared to baseline in patients taking GWP42003-P  
3520 compared with placebo.

#### 3521 3.3.2 Secondary Efficacy Endpoints

3522 The secondary endpoints will be tested hierarchically, based on the order given in Section 5.5.1,  
3523 Table 3. No multiplicity adjustments will be made for all other secondary endpoints.

##### 3524 3.3.2.1 Key Secondary Efficacy Endpoints

- 3525 1. Change in total seizure frequency.
- 3526 2. Number of patients considered treatment responders, defined as those with a  $\geq 50\%$  reduction  
3527 in convulsive seizures from baseline.
- 3528 3. Caregiver Global Impression of Change (CGIC) score.

##### 3529 3.3.2.2 Other Secondary Efficacy Endpoints

3530 The following endpoints will be compared between treatment groups over the 14-week, double-blind  
3531 treatment period:

- 3532 • Number of patients experiencing a  $>25\%$  increase,  $\geq 0$  to  $\leq 25\%$  increase,  $>0$  to  $<25\%$   
3533 reduction,  $\geq 25$  to  $<50\%$  reduction,  $\geq 50$  to  $<75\%$  reduction or  $\geq 75\%$  reduction in convulsive  
3534 seizures from baseline.
- 3535 • Number of patients considered treatment responders, defined as those with a  $\geq 25\%$  or  $\geq 75\%$   
3536 reduction in convulsive seizures from baseline (overall and 4-weekly).
- 3537 • Number of patients who are convulsive seizure free.
- 3538 • Change in non-convulsive seizure frequency.
- 3539 • Change in subtypes of seizures.
- 3540 • Changes from baseline in number of episodes of status epilepticus.
- 3541 • Changes from baseline in duration of seizure subtypes as assessed by the Caregiver Global  
3542 Impression of Change in Seizure Duration (CGICSD).
- 3543 • Changes from baseline in usage of rescue medication.
- 3544 • Changes from baseline in number of inpatient hospitalizations due to epilepsy.
- 3545 • Changes from baseline in Sleep Disruption 0–10 Numerical Rating Scale (0-10 NRS) score.
- 3546 • Changes from baseline in Epworth Sleepiness Scale (ESS) score.
- 3547 • Changes from baseline in the Quality of Life in Childhood Epilepsy (QOLCE) score.
- 3548 • Change from baseline in cognitive function as measured with a cognitive assessment battery.
- 3549 • Changes from baseline in the Vineland Adaptive Behavior Scales, Second Edition (Vineland-  
3550 II) score.
- 3551 • Change from baseline in growth and development by measurement of height, weight, insulin-  
3552 like growth factor-1 (IGF-1) levels and Tanner Staging (for patients aged 10–17 [inclusive],  
3553 or earlier if clinically indicated by onset of menarche or other signs of precocious puberty).

- 3554 PK:
- 3555 • The plasma concentrations of CBD and its major metabolites will be determined following
- 3556 single and multiple doses of GWP42003-P. The following PK parameters will be calculated
- 3557 from sparse sampling:
- 3558 ○ The concentration at each time interval ( $C_t$ ) of CBD and its metabolites.
  - 3559 ○ Area under the plasma concentration curve ( $AUC_{0-t}$ ) from time zero to the last
  - 3560 measurable concentration.
- 3561 • Plasma concentrations of concomitant AEDs before and after treatment with GWP42003-P,
  - 3562 where available.
  - 3563 • The plasma concentrations of THC and its major metabolites will be determined at a single
  - 3564 time point (Visit 8, 2–3 hours post-dose) following multiple doses of GWP42003-P.
  - 3565 • The concentrations of THC, CBD, and their major metabolites will be determined in urine
  - 3566 after multiple doses of GWP42003-P.

### 3567 3.3.3 Safety Variables

3568 The safety profile of GWP42003-P compared with placebo will also be assessed at each Dose Level

3569 by measuring:

- 3570 • Adverse events (AEs).
- 3571 • Vital signs.
- 3572 • Physical examination parameters.
- 3573 • 12-lead electrocardiogram (ECG).
- 3574 • Clinical laboratory parameters.
- 3575 • Columbia-Suicide Severity Rating Scale (C-SSRS) score.
- 3576 • Cannabis Withdrawal Scale (CWS) or Pediatric Cannabinoid Withdrawal Scale (PCWS)
- 3577 score, as appropriate.
- 3578 • Abuse liability.
- 3579 • Effects on menstruation cycles (in females).

## 3580 4. Blinded Data Review Meeting

3581 Prior to breaking the blind, it is anticipated that a Blinded Data Review Meeting (BDRM) will take

3582 place. The objectives of the meeting will include:

- 3583 • Assessment of any study entry violations and protocol deviations.
- 3584 • Assessment of the use of concomitant medications (including rescue medication) to identify
- 3585 changes which could affect the primary assessment of efficacy.
- 3586 • Review of any protocol deviations and any potential effect on the study results. Assess the
- 3587 need for additional analyses using a per protocol (PP) population.
- 3588 • Review of missing data and any potential effect on the study results.
- 3589 • Safety reporting approach for any patients who potentially received the incorrect IMP during
- 3590 the double-blind phase.
- 3591 • Assessment of any changes in concomitant AEDs for medical reasons.

3592 The meeting will have access to the following blinded summary tables and listings:

- 3593 • All pre-randomization patient data.

- 3594 • All patient efficacy data.
- 3595 • All concomitant medication data.
- 3596 • All patient safety data.
- 3597 • Patient protocol deviation logs.

3598 This SAP documents the currently planned analyses for this study that will be approved prior to  
 3599 breaking the blind for the study. Changes to the analyses planned within any previously approved  
 3600 versions of the SAP will be summarized in Section 5.8 and integrated into the text of the SAP. The  
 3601 minutes of the BDRM will be documented separately.

## 3602 5. Statistical Methods

### 3603 5.1 General Considerations

3604 In all tables, listings and figures, the treatment arms will be referred to and labelled as per Table 1.

3605 **Table 1 Study Treatments**

| Endpoint | Actual Treatment        | Treatment Label  |
|----------|-------------------------|------------------|
| Efficacy | Pooled Placebo          | Placebo          |
| Safety   | 10 mg/kg/day Placebo    | Placebo 10 mg/kg |
|          | 20 mg/kg/day Placebo    | Placebo 20 mg/kg |
| All      | 10 mg/kg/day GWP42003-P | 10 mg/kg         |
| All      | 20 mg/kg/day GWP42003-P | 20 mg/kg         |

3608 For safety tables where placebo is split by dosing volume, an additional Pooled Placebo column will  
 3609 be included.  
 3610

3611 In all tables, listings and figures, the study visits will be referred to and labelled as per Table 2.

3612 **Table 2 Study Visits**

| Actual Visit                   | Visit Label      |
|--------------------------------|------------------|
| Visit 1: Screening             | Screening        |
| Visit 2: Day 1, baseline visit | Day 1            |
| Visit 3: Day 15                | Day 15           |
| Visit 4: Day 29                | Day 29           |
| Visit 5: Day 43                | Day 43           |
| Visit 6: Day 57                | Day 57           |
| Visit 7: Day 71                | Day 71           |
| Visit 8: Day 99                | End of Treatment |
| Visit 9: Day 109               | End of Taper     |
| Visit 10: Day 137              | Safety Follow-Up |

3613 Unless stated otherwise, continuous variables will be summarized showing the number of  
 3614 non-missing values (n), mean, standard deviation, median, minimum and maximum and  
 3615 categorical variables will be summarized showing the number and percentage of patients  
 3616 falling into each category. For continuous summaries of seizure frequency, the lower and  
 3617 upper quartiles will also be presented.  
 3618 Minimum and maximum values will be presented to the same decimal precision as the raw  
 3619 data. Mean and median will be presented to 1 more decimal place than the raw data, and  
 3620 standard deviation to 2 more decimal places than the raw data. Percentages will be presented  
 3621 to 1 decimal place.  
 3622 All analyses and summaries will be produced using SAS Version 9.3 or higher.  
 3623

## 3624 **5.1.1 Missing Data**

### 3625 **5.1.1.1 Handling of Missing Data for the Primary Efficacy Endpoint**

3626 If a patient withdraws during the treatment period, then the primary analysis variable will be  
 3627 calculated from all the available data, during the treatment period, prior to the patient withdrawing.  
 3628 Section 5.5.2.1 describes sensitivity analyses to account for missing data arising from unreported  
 3629 days in the Interactive Voice Response System (IVRS), and missing data arising from patients  
 3630 withdrawing during the treatment period.

### 3631 **5.1.1.2 Handling of Missing Data for the Secondary Efficacy Endpoints**

#### 3632 **5.1.1.2.1 Epworth Sleepiness Scale**

3633 If the scores of fewer than 4 of the 8 individual questions are missing, the missing items will be  
 3634 imputed as the mean of the remaining non-missing scores, for the calculation of the total score only.  
 3635 If the scores of 4 or more of the individual questions are missing, the missing items will not be  
 3636 imputed and the total score will be missing; hence, the patient will not be included in the summary or  
 3637 analysis for that visit.

#### 3638 **5.1.1.2.2 Quality of Life in Childhood Epilepsy**

3639 The calculations of subscale and overall scores for the QOLCE will treat responses of ‘Not  
 3640 Applicable’ as missing values.  
 3641 For each subscale, if less than 50% of the items within the subscale are missing (including ‘Not  
 3642 Applicable’) then the subscale score will be calculated using the mean of the non-missing items. If  
 3643 50% or more of the items within the subscale are missing then the subscale score will not be  
 3644 calculated and will be missing.  
 3645 For the overall quality of life score, if fewer than 8 of the 16 subscale scores are missing then the  
 3646 overall quality of life score will be calculated using the mean of the non-missing subscale scores. If  
 3647 8 or more of the subscale scores are missing then the overall quality of life score will not be  
 3648 calculated and will be missing.

#### 3649 **5.1.1.3 Adverse Events**

3650 Missing and/or incomplete dates/times for AEs will be imputed in a manner resulting in the earliest  
 3651 onset or the longest duration during the treatment period, taking into account that the start date/time  
 3652 should not be after the stop date/time. Stop dates/times will not be imputed if the AE is ongoing.  
 3653 The imputation method will only be used to determine treatment emergence, and imputed dates/times  
 3654 will not be presented in AE outputs.  
 3655 A worst-case approach will be followed in the event of missing severity or causality data. If the  
 3656 severity is missing, ‘Severe’ will be imputed. If causality data is missing, ‘Yes’ will be imputed for  
 3657 the question ‘Plausible relationship to study medication’.

#### 3658 **5.1.1.4 Concomitant Medication**

3659 Missing concomitant medication dates will be handled in a similar fashion as described for AEs in  
 3660 Section 5.1.1.3.

## 3661 **5.1.2 Day Numbering**

3662 The first day of treatment (Day 1) will be the date of the Visit 2. However, if the first dose  
 3663 of IMP was not administered on site (as indicated on the CRF) then the date of first dose will  
 3664 be calculated using the information on the ‘IMP Missed Doses Log’ CRF page.

3665 Any days prior to Day 1 will be numbered relative to this day and calculated as:

3666  $\text{Date} - (\text{Date of Day 1})$

3667 to give Day -1, -2, -3 etc.



3668 Any days post Day 1 will be calculated as:  
3669  $1 + \text{Date} - (\text{Date of Day 1})$

### 3670 **5.1.3 Definitions**

#### 3671 **5.1.3.1 Baseline**

3672 For clinic visit based endpoints, baseline is defined as the last record or measure collected  
3673 prior to the first dose of IMP.

3674 For IVRS based endpoints, baseline will include all available data prior to Day 1.

#### 3675 **5.1.3.2 Last Visit**

3676 Last visit for endpoints assessed at clinic visits is defined as the last scheduled visit (not  
3677 including the end of taper or safety follow-up visits) at which a patient's last evaluation is  
3678 performed.

#### 3679 **5.1.3.3 Treatment Period**

3680 The treatment period is defined as Day 1 to the earlier of:

- 3681 • Day 99.
- 3682 • The date of last dose as recorded on the 'End of Treatment Study Outcome' CRF  
3683 page.

#### 3684 **5.1.3.4 Maintenance Period**

3685 The maintenance period is defined as Day 15 to the earlier of:

- 3686 • Day 99.
- 3687 • The date of last dose as recorded on the 'End of Treatment Study Outcome' CRF  
3688 page.

#### 3689 **5.1.3.5 Convulsive Seizures**

3690 Convulsive seizures are defined as tonic-clonic, tonic, clonic or atonic seizures.

#### 3691 **5.1.3.6 Non-Convulsive Seizures**

3692 Non-convulsive seizures are defined as myoclonic, countable partial, other partial or absence  
3693 seizures.

#### 3694 **5.1.3.7 Total Seizures**

3695 Total seizures are defined as the combination of convulsive and non-convulsive seizures.

## 3696 **5.2 Analysis Sets and Protocol Deviations**

3697 There will be 3 analysis sets.

### 3698 **5.2.1 Safety Analysis Set**

3699 All randomized patients who received at least one dose of IMP will be included and  
3700 analyzed according to the treatment received. Only patients for whom it has been confirmed  
3701 that they did not take any IMP will be excluded from this safety analysis set.

3702 Upon blinded review of the data, it was identified that 1 patient was randomized in error, but  
3703 did not receive IMP. This patient will be excluded from the safety analysis set.

3704 Upon blinded review of the data, it was identified that 4 patients randomized to receive the  
3705 10 mg/kg/day dose (GWP42003-P or placebo) incorrectly received up to 20 mg/kg/day (up  
3706 to 50 mg/kg/day for 1 patient) during the treatment period. For safety reporting, these  
3707 patients will be assigned to the 20 mg/kg/day dose groups (GWP42003-P or placebo).

### 3708 **5.2.2 Intention to Treat Analysis Set**

3709 All randomized patients who received at least one dose of IMP and have post-baseline  
3710 efficacy data will be included and analyzed according to the treatment group to which they  
3711 were randomized.

3712 The intention to treat (ITT) analysis set is the primary analysis set for all efficacy endpoints.  
3713 Upon blinded review of the data, it was identified that 1 patient was randomized in error, but  
3714 did not receive IMP. This patient will be excluded from the ITT analysis set.

### 3715 **5.2.3 Per Protocol Analysis Set and Protocol Deviations**

3716 If there are a sufficient number of significant protocol deviations in the study, a PP analysis  
3717 set may also be presented.

3718 All patients who complete the study, with no protocol deviations deemed to compromise the  
3719 assessment of efficacy, will be included and analyzed according to the treatment group they  
3720 were randomized to. The rules determining the PP analysis set will be fully defined prior to  
3721 unblinding of the database.

3722 A listing will be produced of protocol deviations for the clinical study report. These protocol  
3723 deviations will be imported from the protocol deviations log. Protocol deviations will be  
3724 classed as minor, important or major, where major deviations are classed as important  
3725 protocol deviations leading to exclusion from the PP analysis set.

3726 Protocol deviations were reviewed during the BDRM on 21<sup>st</sup> September 2018. In addition to  
3727 patients in the ITT analysis set who withdrew from the study during the treatment phase, a  
3728 number of patients were deemed to have protocol deviations that should lead to exclusion  
3729 from the PP analysis set. These patients, together with their deviations, are detailed in a  
3730 separate document finalized prior to unblinding.

### 3731 **5.3 Listings**

3732 All data will be listed and ordered by site, treatment, patient number and, where appropriate,  
3733 chronological order of assessment. Listings will be created for each of the subsequent  
3734 sections of the SAP.

3735 Visit date need not be included on all of the listings, but day numbers will be included,  
3736 where appropriate.

3737 Other derived variables (e.g. changes from baseline values) that are calculated for analysis  
3738 purposes or to aid interpretation of the data will be added to the listings as appropriate.

### 3739 **5.4 Demographic Data and Patient Characteristics**

#### 3740 **5.4.1 Patient Disposition**

3741 Patient disposition, by site, by country and overall, will be summarized using standard  
3742 summary statistics. The number screened, number of screen failures and number  
3743 randomized will be included.

3744 A screen failure disposition table will be presented, including number of patients screened,  
3745 number failing screening, number randomized and the reasons for failing screening.

3746 Patient disposition, including patients treated, patients completed the treatment phase and the

3747 taper phase, patients discontinued (including reason for discontinuation) from the treatment  
 3748 and taper phases will be summarized by absolute counts (n) and percentages (%). A further  
 3749 table split by site, and by country will be produced, showing number of patients randomized,  
 3750 withdrawn and completed the treatment phase at each site or in each country.

#### 3751 **5.4.2 Analysis Sets**

3752 Patients included in the safety, ITT and PP analysis sets, and patients excluded together with  
 3753 reasons for exclusion, will be summarized by absolute counts (n) and percentages (%).

#### 3754 **5.4.3 Demographic Data and Baseline Characteristics**

3755 The following demographic data will be summarized by treatment group and overall for the  
 3756 safety, ITT and PP analysis sets:

- 3757 • Age (years);
- 3758 • Age group (2-5 years, 6-12 years and 13-18 years);
- 3759 • Sex;
- 3760 • Race;
- 3761 • Country;
- 3762 • Region (United States, Rest of the World);
- 3763 • Weight at baseline (kg);
- 3764 • Height at baseline (cm);
- 3765 • Body mass index at baseline (kg/m<sup>2</sup>).

3766 Age will be calculated as:

3767 (Date of screening – date of birth) ÷ 365.25.

3768 The following baseline characteristics will be summarized by treatment group and overall for  
 3769 the safety, ITT and PP analysis sets:

- 3770 • Average number of convulsive seizures per 28 days.
- 3771 • Average number of non-convulsive seizures per 28 days.
- 3772 • Average number of total seizures per 28 days.
- 3773 • Number of patients with seizures during the baseline period, by seizure type.
- 3774 • Number of antiepileptic medications a patient has used, prior to the study.
- 3775 • Number of antiepileptic medications a patient is currently taking.
- 3776 • Total number of prior and current antiepileptic medications.
- 3777 • Number of patients taking clobazam (Yes, No, and if no, Prior).
- 3778 • Number of patients taking valproic acid (Yes, No, and if no, Prior).
- 3779 • Number of patients taking stiripentol (Yes, No, and if no, Prior).
- 3780 • Number of patients taking levetiracetam (Yes, No, and if no, Prior).
- 3781 • Number of patients taking topiramate (Yes, No, and if no, Prior).

3782 The number of prior antiepileptic medications a patient has used will be taken from the  
 3783 'History of antiepileptic medications and therapies' CRF page. The number of antiepileptic

3784 medications a patient is currently taking is based on the ‘Concomitant antiepileptic  
3785 medications’ CRF page. If a patient has a medication listed on both the ‘History of  
3786 antiepileptic medications and therapies’ and ‘Concomitant antiepileptic medications’ CRF  
3787 pages, then the medication is considered concomitant (see Section 5.7.1); this will not be  
3788 included in the number of prior antiepileptic medications for that patient. Antiepileptic  
3789 medications starting after the last dose of IMP during the treatment period will not be  
3790 counted.

3791 Patients taking the same antiepileptic medication type, but where the medications were  
3792 coded to different generic terms will be counted only once within the medication type. For  
3793 example, valproate sodium, valproic acid, valproate semisodium and ergenyl chrono will all  
3794 be counted as valproic acid and counted once under that term.

3795 The number of patients taking clobazam is defined as the number of patients taking  
3796 clobazam at any point during baseline period or treatment period. The same definition will  
3797 apply for the number of patients taking valproic acid, stiripentol, levetiracetam and  
3798 topiramate.

3799 Previous cannabis use will be included within the baseline characteristics listing.

#### 3800 **5.4.4 Epilepsy and Dravet Syndrome History**

##### 3801 **5.4.4.1 Dravet Syndrome History**

3802 The following DS history data will be summarized by treatment group and overall for the  
3803 safety analysis set:

- 3804 • Was development ever normal? (Yes, No, Unknown).
- 3805 • If developmental delay is present, age concerns first arose (years).
- 3806 • Is there intellectual disability, mental retardation or learning disability? (Yes, No).
  - 3807 ○ If yes, how severe is the intellectual disability, mental retardation or learning
  - 3808 disability? (Mild, Moderate, Severe, Profound, Other, Unknown).
- 3809 • Was there developmental regression? (Yes, No).
  - 3810 ○ If yes, at what age (years).
- 3811 • Is the patient verbal or nonverbal? (Verbal, Non-Verbal).
  - 3812 ○ If Verbal, extent of vocabulary (Single words, 2–3 word phrases, Long
  - 3813 sentences, Other).
- 3814 • Age patient started walking (years).
- 3815 • Has any medication increased seizure frequency? (Yes, No).
- 3816 • Has any medication reduced seizure frequency? (Yes, No).
- 3817 • Has there been a prolonged seizure free period greater than 6 months? (Yes, No).
  - 3818 ○ If yes, age at last occurrence (years).

##### 3819 **5.4.4.2 History of Seizures No Longer Occurring and History of Current Seizures**

3820 Data will be summarized by treatment group and overall for the safety analysis set,  
3821 separately, for history of seizures no longer occurring and history of current seizures.

3822 The following will be summarized by each seizure type:

- 3823 • Number of patients with the seizure type.

- 3824 • Age at onset (years).
- 3825 • Age of last occurrence (years). For history of seizures no longer occurring only.
- 3826 • Seizure duration (<2 minutes, 2–10 minutes, >10 minutes, Unknown). For history of
- 3827 current seizures only.

3828 Seizure frequency and trigger data will be listed only.

3829 For patients with more than 1 record for a particular seizure type, the earliest onset, most  
3830 recent age of last occurrence and longest duration will be used for the summary table.

#### 3831 **5.4.4.3 Electroencephalography History**

3832 The following electroencephalography (EEG) history data will be summarized by treatment  
3833 group and overall for the safety analysis set:

- 3834 • Has the patient ever had a normal EEG? (Yes, No).
  - 3835 ○ If yes, how old was the patient when they last had a normal EEG? (Years).
- 3836 • Has the patient ever had an abnormal EEG? (Yes, No, Unknown).
- 3837 • If yes:
  - 3838 ○ EEG findings (Focal spikes, Generalized spike wave discharges,
  - 3839 Hypsarrhythmia, Electrographic seizures).
  - 3840 ○ Seizure type (Partial (focal) seizures, Generalized seizures, Other).
    - 3841 ▪ Generalized seizures type (Generalized spike & wave, Generalized
    - 3842 paroxysmal fast activity, Generalized electrodecrement at onset).
  - 3843 ○ Seizure features (Background slowing and/or disorganization, Focal slowing,
  - 3844 Other).

#### 3845 **5.4.4.4 Neuroimaging History**

3846 Neuroimaging history data will be listed only.

#### 3847 **5.4.5 Medical and Surgical History and Current Medical Conditions**

3848 All conditions and diagnoses on the ‘non-epilepsy medical history’ CRF page will be coded  
3849 using Version 17.1 of the Medical Dictionary for Regulatory Activities (MedDRA v17.1).  
3850 The number of patients with relevant or significant non-epilepsy medical or surgical history  
3851 and medical history by system organ class, and preferred term, will be summarized by  
3852 absolute counts (n) and percentages (%). Percentages will be calculated based on the  
3853 number of patients in the specific treatment group. Two tables will be produced, one  
3854 including any events classified as resolved at screening, and the other including all current  
3855 conditions.

### 3856 **5.5 Efficacy Analysis**

#### 3857 **5.5.1 General Approach**

3858 The primary analyses will use the ITT analysis set. Further analyses using the PP analysis  
3859 set will also be performed for the primary endpoint and secondary endpoints where specified  
3860 in the sections below.

3861 The primary null hypothesis is:

- 3862 • Following 14 weeks of treatment there is no difference in effect between the
- 3863 20 mg/kg/day GWP42003-P treatment group and the placebo treatment group in
- 3864 terms of the change in convulsive seizure frequency during the treatment period
- 3865 compared to baseline.

3866 The null hypothesis will be rejected if there is statistical evidence of a difference between the

3867 treatment groups at the  $\alpha$ -level of 0.05 for the primary endpoint.

3868 Statistical hypothesis testing will be performed on the primary endpoint and other endpoints

3869 as appropriate. Each endpoint, including the primary will have 2 comparisons against

3870 placebo (20 mg/kg/day GWP42003-P and 10 mg/kg/day GWP42003-P vs. placebo). Also,

3871 3 key secondary endpoints have been defined.

3872 The primary and key secondary endpoints will be tested with their Type I error controlled by

3873 use of a hierarchical gate-keeping procedure, in the sequence given in Table 3. One must

3874 reject the null hypothesis of an endpoint at the level of 0.05 (2-sided) to test the hypothesis

3875 of the subsequent endpoint in the sequence at the level of 0.05 (2-sided). If a null hypothesis

3876 is not rejected then testing will stop and all subsequent analyses will be declared not

3877 statistically significant.

3878 **Table 3 Hierarchy for Analysis**

| Test | Endpoint                               | Treatment Comparison                |
|------|----------------------------------------|-------------------------------------|
| 1    | Primary endpoint                       | 20 mg/kg/day GWP42003-P vs. Placebo |
| 2    | Primary endpoint                       | 10 mg/kg/day GWP42003-P vs. Placebo |
| 3    | 1 <sup>st</sup> key secondary endpoint | 20 mg/kg/day GWP42003-P vs. Placebo |
| 4    | 1 <sup>st</sup> key secondary endpoint | 10 mg/kg/day GWP42003-P vs. Placebo |
| 5    | 2 <sup>nd</sup> key secondary endpoint | 20 mg/kg/day GWP42003-P vs. Placebo |
| 6    | 2 <sup>nd</sup> key secondary endpoint | 10 mg/kg/day GWP42003-P vs. Placebo |
| 7    | 3 <sup>rd</sup> key secondary endpoint | 20 mg/kg/day GWP42003-P vs. Placebo |
| 8    | 3 <sup>rd</sup> key secondary endpoint | 10 mg/kg/day GWP42003-P vs. Placebo |

3879

3880 All statistical tests will be 2-sided and use the 5% significance level.

3881 The assumptions of normality and homogeneity of variance, for endpoints analyzed using

3882 parametric tests, will be checked where appropriate via examination of residual plots as well

3883 as computation of summary statistics for normality using the Shapiro–Wilk statistical test. If

3884 assumptions are violated then alternative non-parametric techniques will be used. In this

3885 instance the original parametric tests will be presented as a sensitivity analysis.

### 3886 5.5.2 Primary Efficacy Endpoint

3887 The primary endpoint is the change in convulsive seizure frequency during the treatment

3888 period (see Section 5.1.3.3) of the study compared to baseline (see Section 5.1.3.1) in

3889 patients taking GWP42003-P compared with placebo.

3890 The primary endpoint will be analyzed using negative binomial regression on the sum of the

3891 convulsive seizure counts during the treatment period. However, convulsive seizure

3892 frequency (28-day average) and percentage change in seizure frequency will be presented

3893 using summary statistics. Percentage change from baseline in convulsive seizure frequency

3894 will be calculated as:

$$3895 \quad \left[ \frac{\text{Frequency during the treatment period} - \text{Frequency during baseline}}{\text{Frequency during}} \right. \\ 3896 \quad \left. \text{baseline} \right] \times 100$$

3897 The frequency during each period will be based on 28-day averages and calculated as:

$$3898 \quad \left( \frac{\text{Number of seizures in the period}}{\text{Number of reported days in IVRS in the period}} \right) \times 28$$

3899 For convulsive seizure endpoints only, if patients are randomized with no convulsive

3900 seizures during the baseline period then the percentage change from baseline will be  
3901 calculated as:

$$3902 \quad (\text{Frequency during the treatment period} + 1) \times 100$$

3903 A mixed effect model with repeated measures will be performed modelling the observed  
3904 number of convulsive seizures in the baseline period and treatment period implemented  
3905 within the framework of general linear models using the negative binomial response  
3906 distribution. The model will include stratified age group (2–5 years, 6–12 years and  
3907 13–18 years), time, treatment arm and treatment arm by time interaction as fixed effects and  
3908 patient as a random effect. The log transformed number of days in which seizures were  
3909 reported will be included as an offset. The time variable corresponds to an indicator for the  
3910 baseline period and treatment period.

3911 The GLIMMIX procedure in SAS will be utilized to perform the analysis with the option  
3912 maxopt=300 applied. If the model fails to converge, then the statement ‘nloptions  
3913 tech=nr ridge;’ will be added. If convergence is still not achieved then ‘method=laplace’ will  
3914 be utilized. However, if convergence is still not possible, then the model will be changed to  
3915 utilize the log normal response distribution (log rate model). If the log rate model is required  
3916 and there are patients with a seizure frequency during the baseline or treatment period of 0  
3917 then all patients will have their baseline and treatment period seizure frequency adjusted by  
3918 adding a value of 1.

3919 The estimated ratio of least squares means for treatment period to baseline period and 95%  
3920 confidence intervals (CIs) will be presented for each treatment arm. In addition, the  
3921 estimated ratio of each GWP42003-P group to placebo and 95% CIs will be presented along  
3922 with the p-value testing the null hypothesis that this ratio is 1.

3923 For each ratio and upper and lower bound of the 95% CI, the percentage reduction will also  
3924 be presented, calculated as:

$$3925 \quad [1 - (X \div Y)] \times 100\%$$

3926 Where X corresponds to the treatment period estimate, or GWP42003-P ratio, and Y  
3927 corresponds to the baseline period estimate, or placebo arm ratio.

3928 Primary efficacy analysis will be performed using ITT analysis set.

3929 For a period of time, the limit for the number of daily seizures for each seizure type recorded  
3930 in IVRS was 99. A >99 seizure log was added to the CRF to allow the capture of the exact  
3931 number of seizures where the count on a particular day was >99. When deriving the seizure  
3932 frequencies, the count >99 provided on the CRF will replace the recorded 99 seizures in  
3933 IVRS for the corresponding seizure type. This will only be done when the corresponding  
3934 IVRS record was exactly 99.

### 3935 **5.5.2.1 Sensitivity Analyses for the Primary Efficacy Endpoint**

3936 The following sensitivity analyses will be conducted for the primary endpoint:

- 3937 • Primary endpoint analysis repeated using the PP analysis set.
- 3938 • Wilcoxon rank-sum test on percentage change from baseline in convulsive seizure  
3939 frequency during the treatment period. An estimate of the median differences  
3940 between each GWP42003-P group and placebo, together with approximate 95% CIs,  
3941 will be calculated using the Hodges–Lehmann approach.
- 3942 • A rank analysis of covariance (ANCOVA) on percentage change from baseline in  
3943 convulsive seizure frequency during the treatment period.

3944 The ranks of the percentage change from baseline and the baseline convulsive seizure  
3945 frequency will be calculated. The rank of the percentage change from baseline will  
3946 then be analyzed using an ANCOVA model with the rank of the baseline convulsive

3947 seizure frequency and age group (2–5 years, 6–12 years and 13–18 years) as  
 3948 covariates and treatment group as a fixed factor. The estimated least squares means,  
 3949 treatment differences, together with the 95% CIs and p-values will be presented.

- 3950 • ANCOVA of log transformed convulsive seizure frequency during the treatment  
 3951 period.

3952 The convulsive seizure frequency during the treatment period and the baseline  
 3953 convulsive seizure frequency will be log transformed prior to analysis. The log  
 3954 transformed convulsive seizure frequency during the treatment period will then be  
 3955 analyzed using an ANCOVA model with the log transformed baseline convulsive  
 3956 seizure frequency and age group as covariates and treatment group as a fixed factor.  
 3957 The back transformed estimated treatment ratios, together with the 95% CIs and p-  
 3958 values will be presented.

3959 If there are any patients with no seizures during the baseline or treatment periods,  
 3960 then 1 will be added to the convulsive seizure frequency for all patients prior to log  
 3961 transformation.

- 3962 • ANCOVA on percentage change from baseline in convulsive seizure frequency  
 3963 during the treatment period including baseline and age group as covariates and  
 3964 treatment group as a fixed factor. The estimated least squares means, treatment  
 3965 differences, together with the 95% CIs and p-values will be presented.

- 3966 • Primary endpoint analysis repeated using the maintenance period (see Section  
 3967 5.1.3.4) rather than the treatment period.

3968 This analysis will include only patients who have at least 7 days of seizure data  
 3969 within the maintenance period.

- 3970 • Primary endpoint analysis repeated using each 4 weeks of the maintenance period  
 3971 (Week 1–4, Week 5–8 and Week 9–12 of the 12-week maintenance period).

3972 This analysis will include only patients who have at least 7 days of seizure data  
 3973 within each corresponding 4-week period rather than the treatment period.

- 3974 • Primary endpoint analysis repeated using the worst case of last observation carried  
 3975 forward (LOCF), next observation carried backward (NOCB) and the daily mean  
 3976 from the non-missing data for each patient (rounded up to the nearest integer) to  
 3977 impute missing data arising from unreported days in IVRS during the treatment  
 3978 period only (not the baseline period).

3979 Any intermittent missing data for the number of convulsive seizures arising from  
 3980 unreported days in IVRS will be imputed using the worst (highest number of  
 3981 seizures) of the following for each patient: LOCF, NOCB and the mean daily number  
 3982 of seizures during the treatment period (rounded up to the nearest integer) based on  
 3983 using non-missing data:

$$\text{Number of seizures} \div \text{Number of reported days in IVRS}$$

- 3984 • Wilcoxon rank-sum test on percentage change from baseline in convulsive seizure  
 3985 frequency during the treatment period, using multiple imputation (MI) to impute data  
 3986 under the Missing Not at Random (MNAR) assumption (see Section 5.5.2.1.1).  
 3987
- 3988 • Primary endpoint analysis repeated using the safety analysis set.

#### 3989 **5.5.2.1.1 Sensitivity Analysis of Missing Data**

3990 Missing data in this trial could potentially arise from the mechanism of MNAR. In order to  
 3991 understand the impact on the trial findings from missing data under the MNAR assumption,  
 3992 sensitivity analyses of the primary endpoint will be carried out for the ITT analysis set by



3993 multiple imputations on convulsive seizure frequency, based on time-points corresponding to  
 3994 each 14 days of the treatment period. The final period will consist of 15 days to include Day  
 3995 99, if applicable.

3996 For each 14 calendar days of the treatment period (15 days for the final period), the  
 3997 convulsive seizure frequency will be calculated as:

3998 
$$\left[ \frac{\text{Number of convulsive seizures in the period}}{\text{Total number of reported days in IVRS for}} \right. \\
 3999 \quad \left. \text{all combined periods (maximum of 99 days)} \right] \times 28$$

4000 For patients with any periods with no reported days in IVRS, the total number of reported  
 4001 days in IVRS will include an additional 14 days for each missing period. For example, if a  
 4002 patient withdraws with 80 reported days in IVRS from 6 of the 7 14-calendar-day periods,  
 4003 then the total number of reported days in IVRS for the above calculation will be the sum of  
 4004 80 and 14, i.e. 94 days.

4005 Intermittent missing values for intermediate nominal visits before the last nominal visit will  
 4006 be imputed using the MCMC method in PROC MI with an IMPUTE=MONOTONE  
 4007 statement for 100 times for each treatment group separately. The resulting 100 partially  
 4008 imputed datasets will have a monotone missing pattern and will be further imputed under an  
 4009 MNAR assumption that the imputed value for the missing efficacy data of GWP42003-P  
 4010 patients (discontinued for certain reasons) are similar to, worse than, or better than those of  
 4011 placebo patients for the following 2 scenarios:

4012 (1) MNAR assumed for missing values resulting from discontinuation due to AEs in the  
 4013 GWP42003-P groups and Missing at Random (MAR) for others, including other patients  
 4014 discontinued in the GWP42003-P groups and patients in placebo group;

4015 (2) MNAR assumed for missing values resulting from discontinuation due to any reason or  
 4016 any other monotone missing data in the GWP42003-P groups and MAR for others, including  
 4017 patients in placebo group.

4018 For each of the 2 scenarios above, imputation will be carried out once on each of the 100  
 4019 imputed datasets using the SAS MI procedure (with the 100 imputed datasets included in the  
 4020 'BY' statement of the MI procedure) as follows:

4021 • Step 1: Monotone missing data under the MAR assumption at treatment period  
 4022 time-point  $t$  will be imputed by means and covariance from the observed convulsive  
 4023 seizure frequency at baseline and at each treatment period time-point up to time-point  
 4024  $t$  (in chronological order) in their corresponding treatment groups (i.e., patients in the  
 4025 GWP42003-P groups whose missing data are assumed to be MAR and all patients in  
 4026 the placebo group). The imputation will be realized using the MI procedure with the  
 4027 'MONOTONE REG' option, for each treatment group separately. The imputation  
 4028 model will include baseline convulsive seizure frequency and each treatment period  
 4029 time-point up to time-point  $t$  (in chronological order).

4030 • Step 2: With the data imputed from Step 1, monotone missing data of patients in the  
 4031 GWP42003-P groups under the MNAR assumption will be imputed. At each  
 4032 treatment period time-point  $t$ , the input dataset for the MI procedure will include all  
 4033 placebo patients and those patients from each GWP42003-P group that have values  
 4034 missing under MNAR at that time-point. The imputation model will include  
 4035 convulsive seizure frequency at baseline and each treatment period time-point up to  
 4036 time-point  $t$  (in chronological order). After the sequential imputation is completed  
 4037 for all time-points, the imputed values at time-point  $t$  plus, a sensitivity parameter,  $k$   
 4038  $\times$  standard error of the observed convulsive seizure frequency in the placebo group at  
 4039 the corresponding time-point (calculated using the denominator of the total number  
 4040 of reported days in IVRS for all combined periods, as given above) will then form the  
 4041 final imputed values. The sensitivity parameter  $k$  (where, for example,  $k = 0, \pm 0.5, \pm$   
 4042  $1.0, \pm 1.5$ , etc.) will be used to explore the robustness of the estimated treatment

4043 difference to the degree of decrease or increase (positive values of k represent  
4044 decrease and negative values represent increase) in MNAR efficacy from the placebo  
4045 patients.

4046 After missing values at all the time-points are imputed, the overall percentage change from  
4047 baseline in convulsive seizure frequency will be calculated as:

4048 
$$[(\text{The sum of the frequencies of each 14 days of the treatment period} - \text{Frequency during}$$
  
4049 
$$\text{baseline}) \div \text{Frequency during baseline}] \times 100$$

4050 If the sum of the frequencies of each 14 days of the treatment period becomes less than zero,  
4051 as a result of imputation, then the percentage change from baseline in convulsive seizure  
4052 frequency will be set to  $-100\%$ .

4053 The data will then be analyzed using a Wilcoxon rank-sum test.

4054 The results of the Wilcoxon rank-sum test on the 100 imputed datasets will be combined to  
4055 derive an overall p-value. The test statistic will be based on the method provided by Rubin<sup>1</sup>  
4056 and a modified macro from Mogg<sup>2</sup>.

4057 For each analysis, the increment in the positive value of k will stop once the overall p-value  
4058 is greater than 0.05. The decrease in the negative values of k will continue until the overall  
4059 p-value becomes smaller than the p-value from the primary efficacy analysis, for the  
4060 corresponding Dose Level.

### 4061 **5.5.3 Secondary Efficacy Endpoints**

#### 4062 **5.5.3.1 Key Secondary Efficacy Endpoints**

##### 4063 **5.5.3.1.1 1<sup>st</sup> Key Secondary Endpoint: Total Seizures**

4064 Summaries and analyses of total seizures (see Section 5.1.3.7) will be performed as per the primary  
4065 endpoint (Section 5.5.2).

4066 The analysis will be performed on the ITT analysis set and repeated on the PP analysis set.

4067 Sensitivity analyses will be performed on the ITT analysis set, repeating the above analysis, using  
4068 data for only the maintenance period, and during each 4 weeks of the maintenance period (Week 1–4,  
4069 Week 5–8 and Week 9–12 of the 12-week maintenance period).

4070 Analyses on the maintenance period and by each 4 weeks of the maintenance period will include only  
4071 patients who have at least 7 days of seizure data within each corresponding period.

4072

##### 4073 **5.5.3.1.2 2<sup>nd</sup> Key Secondary Endpoint: Convulsive Seizure Treatment Responders** 4074 **( $\geq 50\%$ Reduction in Convulsive Seizure Frequency)**

4075 The proportion of patients considered treatment responders, defined as those with a  $\geq 50\%$  reduction  
4076 in convulsive seizure frequency from baseline, during the treatment period, will be summarized by  
4077 treatment group and analyzed using a Cochran–Mantel–Haenszel (CMH) test stratified by age group.  
4078 The proportion of patients who are considered treatment responders, the difference in proportions  
4079 along with the 95% CI for the difference, the estimated odds ratios (GWP42003-P groups vs.  
4080 placebo), 95% CI for the odds ratios, and the p-values from the CMH test will be presented. If no  
4081 patients in a particular treatment group are considered responders then the odds ratio and 95% CI for  
4082 the odds ratio will not be calculated.

4083 The analysis will be performed on the ITT analysis set and repeated on the PP analysis set.

4084 Sensitivity analyses will be performed on the ITT analysis set, repeating the above analysis, using  
4085 data for the maintenance period only, and during each 4 weeks of the maintenance period (Week 1–4,  
4086 Week 5–8 and Week 9–12 of the 12-week maintenance period).

4087 Analyses on the maintenance period and by each 4 weeks of the maintenance period will include only  
4088 patients who have at least 7 days of seizure data within each period.

### 4089 **5.5.3.1.3 3<sup>rd</sup> Key Secondary Endpoint: Caregiver Global Impression of Change**

4090 The CGIC will be assessed at Visits 3, 4, 6 and 8 (end of treatment). The CGIC comprises  
4091 the following question to be rated on a 7-point scale:

- 4092 • Since your child started treatment, please assess the status of your child's overall  
4093 condition (comparing their condition now to their condition before treatment) using  
4094 the scale below.

4095 The possible responses are: Very Much Improved; Much Improved; Slightly Improved; No  
4096 Change; Slightly Worse; Much Worse; Very Much Worse.

4097 The responses above are based on comparison with a brief description of the patient's overall  
4098 condition used as a memory aid from Visit 2.

4099 Each response will be coded with a score from 1 to 7, where 1 = Very Much Improved, and  
4100 7 = Very Much Worse.

4101 The CGIC response/score, recorded at each visit, will be summarized, on both a categorical and  
4102 continuous scale, by treatment group.

4103 The score at the end of treatment visit and last visit (if different to the end of treatment) will  
4104 be analyzed using ordinal logistic regression. Proportional odds modelling will be carried  
4105 out by including treatment group as a factor. The estimated odds ratios (GWP42003-P arms  
4106 vs. placebo), 95% CI for the odds ratios, and the p-value testing the null hypothesis that the  
4107 odds ratio is equal to 1, will be presented. Analysis performed at the last visit will be  
4108 considered the main analysis for this endpoint, with the analysis at the end of treatment visit  
4109 considered a sensitivity analysis.

4110 Should the proportional odds assumption not hold, i.e. if the p-value for the score test for  
4111 proportional odds assumption is <0.05, then, as a sensitivity analysis, the scores will also be  
4112 analyzed using a Cochran-Armitage trend test. This will be presented together with the  
4113 results of the ordinal logistic regression.

### 4114 **5.5.3.2 Other Secondary Efficacy Endpoints**

#### 4115 **5.5.3.2.1 Convulsive Seizure Treatment Responders and Convulsive Seizure 4116 Freedom**

4117 The number of patients experiencing >25% increase,  $\geq 0$  to  $\leq 25\%$  increase, >0 to <25% reduction,  
4118  $\geq 25$  to <50% reduction,  $\geq 50$  to <75% reduction or  $\geq 75\%$  reduction in convulsive seizure frequency  
4119 from baseline during the treatment period will be summarized by treatment group.

4120 In addition to the key secondary endpoint, the proportion of patients considered treatment responders,  
4121 defined as those with a  $\geq 25\%$  or  $\geq 75\%$  reduction in convulsive seizure frequency from baseline and  
4122 the proportion of patients who are convulsive seizure free, defined as those with a 100% reduction in  
4123 convulsive seizure frequency from baseline, during the treatment period, will be summarized by  
4124 treatment group and analyzed using a CMH test stratified by age as described in Section 5.5.3.1.2.

4125 Additionally, the proportion of patients responding will be presented graphically, by treatment arm,  
4126 by plotting the percent reduction against the cumulative proportion of patients achieving that level of  
4127 reduction. The x-axis will be the percent reduction from baseline and the y-axis will be the  
4128 proportion of patients with at least that amount of reduction, i.e.  $y = \Pr(X \geq x)$ .

4129 Sensitivity analyses will be performed on the ITT analysis set, repeating the above analysis, using  
4130 data for the maintenance period only, and during each 4 weeks of the maintenance period (Week 1–4,  
4131 Week 5–8 and Week 9–12 of the 12-week maintenance period).

4132 Analyses on the maintenance period and by each 4 weeks of the maintenance period will include only  
4133 patients who have at least 7 days of seizure data within each corresponding period.

#### 4134 **5.5.3.2.2 Status Epilepticus**

4135 The number of convulsive seizures greater than 30 minutes in duration and the number of non-

4136 convulsive seizures greater than 30 minutes in duration will be collected daily via IVRS.  
 4137 The number of patients with convulsive and non-convulsive seizures greater than 30 minutes in  
 4138 duration, will be presented for the baseline and treatment periods.  
 4139 In addition, the number of patients with any episodes post-baseline and no episodes during the  
 4140 baseline period, will be summarized by treatment group.

#### 4141 **5.5.3.2.3 Non-Convulsive Seizures**

4142 Non-convulsive seizures will be summarized and analyzed as per the primary endpoint (Section  
 4143 5.5.2). Patients with no non-convulsive seizures during the baseline period will be excluded from the  
 4144 analysis.  
 4145 Sensitivity analyses will be performed on the ITT analysis set, repeating the above analysis, using  
 4146 data for only the maintenance period, and during each 4 weeks of the maintenance period (Week 1–4,  
 4147 Week 5–8 and Week 9–12 of the 12-week maintenance period).  
 4148 Analyses on the maintenance period and by each 4 weeks of the maintenance period will include only  
 4149 patients who have at least 7 days of seizure data within each corresponding period.  
 4150 Non-convulsive seizure responders and freedom will also be summarized and analyzed using the  
 4151 methods described in Section 5.5.3.2.1. Patients with no non-convulsive seizures during the baseline  
 4152 period will be excluded from the analysis.

#### 4153 **5.5.3.2.4 Individual Seizure Types**

4154 For each individual seizure type (tonic–clonic, tonic, clonic, atonic, myoclonic, countable partial,  
 4155 other partial and absence seizures) summaries and analyses will be performed as per the primary  
 4156 endpoint (Section 5.5.2). Patients with no seizures during the baseline period, for a particular seizure  
 4157 type, will be excluded from the analysis of that seizure type.  
 4158 Sensitivity analyses will be performed on the ITT analysis set, repeating the above analysis for tonic,  
 4159 tonic–clonic, atonic and clonic seizures only, using data for only the maintenance period, and during  
 4160 each 4 weeks of the maintenance period (Week 1–4, Week 5–8 and Week 9–12 of the 12-week  
 4161 maintenance period).  
 4162 Analyses on the maintenance period and by each 4 weeks of the maintenance period will include only  
 4163 patients who have at least 7 days of seizure data within each corresponding period.  
 4164 Individual seizure type responders and freedom will also be summarized and analyzed using the  
 4165 methods described in Section 5.5.3.2.1. However, the summaries and analyses during the  
 4166 maintenance period and during each 4 weeks of the maintenance period will be produced for tonic,  
 4167 tonic–clonic, atonic and clonic seizures only. Patients with no corresponding seizures, for a  
 4168 particular seizure type, during the baseline period will be excluded from the analysis for that seizure  
 4169 type.  
 4170 In addition, the number of patients with an occurrence of an individual seizure type not experienced  
 4171 in the baseline period will be summarized by treatment group.  
 4172 An occurrence of an individual seizure type not experienced in the baseline period is calculated as  
 4173 seizure types with no seizures experienced during the baseline period and at least one seizure  
 4174 experienced at any time post first dose of IMP.

#### 4175 **5.5.3.2.5 Caregiver Global Impression of Change in Seizure Duration**

4176 The CGICSD comprises the following question to be rated on a 3-point scale for each seizure type:  
 4177 • Since the patient started treatment, please assess the average duration of the patient’s seizures  
 4178 (comparing their condition now to their condition before treatment) using the scale below.

4179 The 3 possible responses are:

- 4180 • Decrease in average duration.
- 4181 • No change in average duration.
- 4182 • Increase in average duration.

4183 The caregiver will be asked to assess the average duration of the patient’s seizures at Visit 2 (prior to

4184 commencement of IMP) as a memory aid for assessment at the end of treatment visit.  
 4185 Each response will be coded with a score from 1 to 3, where 1 = Decrease in average  
 4186 duration, and 3 = Increase in average duration.  
 4187 For each seizure type, the CGICSD will be summarized by treatment group and analyzed using  
 4188 ordinal logistic regression.  
 4189 Proportional odds modelling will be carried out by including treatment group and age group as  
 4190 factors. The estimated odds ratios (GWP42003-P groups vs. placebo), 95% CI for the odds ratios,  
 4191 and the p-values testing the null hypothesis that the odds ratio is equal to 1, will be presented.

#### 4192 **5.5.3.2.6 Inpatient Hospitalizations due to Epilepsy**

4193 The number of inpatient epilepsy-related hospitalizations since the previous visit are recorded at  
 4194 every visit starting from Visit 2 (Day 1).  
 4195 The number of patients with inpatient epilepsy-related hospitalizations will be presented for  
 4196 the baseline and treatment periods.

#### 4197 **5.5.3.2.7 Sleep Disruption 0-10 Numerical Rating Scale**

4198 The sleep disruption 0-10 NRS will be performed at Visits 2 (Day 1), 3, 4, 6 and 8 (end of  
 4199 treatment). The patient's caregiver will be asked:

- 4200 • "On a scale of '0 to 10', please indicate the number that best describes your child's  
 4201 sleep disruption in the last week."

4202 The markers range from 0 = slept extremely well, to 10 = unable to sleep at all.

4203 The sleep disruption 0-10 NRS score, recorded at each visit, will be summarized, on a  
 4204 continuous scale, by treatment group. The change from baseline (Visit 2) will also be  
 4205 included.

4206 The change from baseline to the end of treatment visit and last visit (if different to the end of  
 4207 treatment) will be analyzed using ANCOVA. The model will include baseline and age  
 4208 group as covariates and treatment group as fixed factor. Analysis performed at the last visit  
 4209 will be considered the main analysis for this endpoint, with the analysis at the end of  
 4210 treatment visit considered a sensitivity analysis.

4211 The estimated least squares means, treatment difference, together with the 95% CIs and  
 4212 p-value will be presented.

#### 4213 **5.5.3.2.8 Epworth Sleepiness Scale**

4214 The ESS is a questionnaire that provides a measure of a person's general level of daytime  
 4215 sleepiness, or their average sleep propensity in daily life. The ESS contains 8 questions that  
 4216 are rated on a 4-point numerical scale (0–3). The total ESS score is the sum of the 8 item-  
 4217 scores and can range between 0 and 24. Higher total scores represent greater levels of  
 4218 daytime sleepiness.

4219 The ESS questionnaire will be completed at Visits 2 (Day 1), 3, 4, 6 and 8 (end of treatment)  
 4220 by the patient's caregiver.

4221 The total score, recorded at each visit, will be summarized, on a continuous scale, by  
 4222 treatment group. The change from baseline (Visit 2) will also be included.

4223 The change from baseline in the total score to the end of treatment visit and last visit (if  
 4224 different to the end of treatment) will be analyzed using the same ANCOVA approach as  
 4225 specified in Section 5.5.3.2.7. Analysis performed at the last visit will be considered the  
 4226 main analysis for this endpoint, with the analysis at the end of treatment visit considered a  
 4227 sensitivity analysis.

4228 Missing data arising from missing individual questions will be handled according to  
 4229 Section 5.1.1.2.1.

4230 **5.5.3.2.9 Quality of Life in Childhood Epilepsy**

4231 The QOLCE is a parent-reported questionnaire that evaluates health related quality of life in children  
 4232 aged 4–18 years old. It contains 76 items with 16 subscales covering 7 domains of life function:  
 4233 physical activities, social activities, cognition, emotional well-being, behavior, general health, and  
 4234 general quality of life. The QOLCE will be completed by the parent or caregiver at Visits 2 (Day 1)  
 4235 and 8 (end of treatment).

4236 All items in the questionnaire are rated on a 5-point or 6-point categorical scale. Based on the  
 4237 responses to the items in each domain, scores for 16 subscales are derived. The subscales are  
 4238 presented in Table 4.

4239 **Table 4 QOLCE Subscales**

| Subscale                | Item Domains         | Items Used                          |
|-------------------------|----------------------|-------------------------------------|
| Physical Restrictions   | Physical Activities  | 3.1 (a to j)                        |
| Energy/Fatigue          | Physical Activities  | 3.2 (a,b)                           |
| Attention/Concentration | Cognition            | 5.1 (a,d,e,f,g)                     |
| Memory                  | Cognition            | 5.1 (j,k,l,m,n,o)                   |
| Language                | Cognition            | 5.1 (p,q,r,s,t,u,v,w)               |
| Other Cognitive         | Cognition            | 5.1 (b,c,h)                         |
| Depression              | Emotional Well-Being | 4.1 (a,d,e,l)                       |
| Anxiety                 | Emotional Well-Being | 4.1 (b,g,j,n,o,p)                   |
| Control/Helplessness    | Emotional Well-Being | 4.1 (c,f,h,i)                       |
| Self-esteem             | Emotional Well-Being | 4.1 (k,m,q,r,s)                     |
| Social Interactions     | Social Activities    | 6.1 (c,f,h)                         |
| Social Activities       | Social Activities    | 6.1 (a,e) and 6.2                   |
| Stigma Item             | Social Activities    | 6.1 (i)                             |
| Behavior                | Behavior             | 7.1 (a,c,f,g,h,I,j,k,l,m,o,q,r,s,t) |
| General Health Item     | General Health       | 8.1                                 |
| Quality of Life Item    | Quality of Life      | 9.1                                 |

4240  
 4241 Items within each subscale will be coded and linearly transformed, according to the methods of  
 4242 Sabaz et al.<sup>3</sup>, to a score of 0 to 100, where 0 represents the lowest or poorest category and 100  
 4243 represents the highest level of functioning.

4244 A subscale score is calculated for each subscale by computing the mean of the items within the  
 4245 subscale. An ‘Overall Quality of Life Score’ can be calculated by taking the mean of the subscale  
 4246 scores.

4247 Individual items will be listed only. The subscale scores and the overall quality of life score,  
 4248 recorded at each visit, will be summarized, on a continuous scale, by treatment group. The  
 4249 change from baseline (Visit 2) will also be included.

4250 The change from baseline to the end of treatment visit, for the overall quality of life score,  
 4251 and the attention/concentration, memory, language, other cognitive, social interactions and  
 4252 behavior subscale scores only, will be analyzed using the same ANCOVA approach as  
 4253 specified in Section 5.5.3.2.7. Exploratory analyses may also be performed on other  
 4254 subscale scores.

4255 Missing data will be handled according to Section 5.1.1.2.2.

4256 **5.5.3.2.10 Vineland Adaptive Behavior Scales, Second Edition**

4257 The Vineland-II is an individually administered instrument for assessing adaptive behaviors.  
 4258 The Vineland-II assessments will be made at Visits 2 (Day 1), 3, 4, 6 and 8 (end of  
 4259 treatment).

4260 The Vineland-II consists of 44 adaptive behavior domains and a maladaptive behavior  
 4261 domain. The details of each domain are presented in Table 5.

4262 **Table 5** Content Description of the Vineland-II

| Domains and Subdomains                     | Number of Items | Age Range (Years) | Content                                                                                                                                            |
|--------------------------------------------|-----------------|-------------------|----------------------------------------------------------------------------------------------------------------------------------------------------|
| <b>Adaptive Behavior Domains</b>           |                 |                   |                                                                                                                                                    |
| <b>Communication Domain</b>                | <b>99</b>       | $\geq 0$          |                                                                                                                                                    |
| Receptive                                  | 20              | $\geq 0$          | How the individual listens and pays attention, and what he or she understands                                                                      |
| Expressive                                 | 54              | $\geq 0$          | What the individual says, how he or she uses words and sentences to gather and provide information                                                 |
| Written                                    | 25              | $\geq 3$          | What the individual understands about how letters make words, and what he or she reads and writes                                                  |
| <b>Daily Living Skills Domain</b>          | <b>109</b>      | $\geq 0$          |                                                                                                                                                    |
| Personal                                   | 41              | $\geq 0$          | How the individual eats, dresses and practices personal hygiene                                                                                    |
| Domestic                                   | 24              | $\geq 1$          | What household tasks the individual performs                                                                                                       |
| Community                                  | 44              | $\geq 1$          | How the individual uses time, money, the telephone, the computer and job skills                                                                    |
| <b>Socialization Domain</b>                | <b>99</b>       | $\geq 0$          |                                                                                                                                                    |
| Interpersonal Relationships                | 38              | $\geq 0$          | How the individual interacts with others                                                                                                           |
| Play and Leisure Time                      | 31              | $\geq 0$          | How the individual plays and uses leisure time                                                                                                     |
| Coping Skills                              | 30              | $\geq 1$          | How the individual demonstrates responsibility and sensitivity to others                                                                           |
| <b>Motor Skills Domain</b>                 | <b>76</b>       | $\geq 0$ to $<7$  |                                                                                                                                                    |
| Gross                                      | 40              | $\geq 0$ to $<7$  | How the individual uses arms and legs for movement and coordination                                                                                |
| Fine                                       | 36              | $\geq 0$ to $<7$  | How the individual uses hands and fingers to manipulate objects                                                                                    |
| <b>Maladaptive Behavior Domain</b>         |                 |                   |                                                                                                                                                    |
| <b>Maladaptive Behavior Index</b>          | <b>36</b>       | $\geq 3$          | A composite of Internalizing, Externalizing, and Other types of undesirable behavior that may interfere with the individual's adaptive functioning |
| Internalizing (Section A)                  | 11              | $\geq 3$          |                                                                                                                                                    |
| Externalizing (Section B)                  | 10              | $\geq 3$          |                                                                                                                                                    |
| Other (Section C)                          | 15              | $\geq 3$          |                                                                                                                                                    |
| <b>Maladaptive Behavior Critical Items</b> | <b>14</b>       | $\geq 3$          | More severe maladaptive behaviors that may provide clinically important information                                                                |

4263

4264 For each subdomain, a raw score is calculated based on the responses to the individual items  
 4265 within the subdomain. For the maladaptive behavior index, the raw score is the sum of the 3  
 4266 subdomain raw scores. Using the raw score and the patients' age the following are obtained:

- 4267 • v-Scale Score: a type of standard score scale (standardized by age) to describe an  
 4268 individual's relative level of functioning. Ranging from a score of 1 to 24.
- 4269 • 90% CI for the v-Scale Score: a range of scores that has a certain likelihood of  
 4270 including the individual's true score.
- 4271 • Adaptive Level: a means to describe an individual's performance using terms that are  
 4272 nearly universal (Low, Moderately Low, Adequate, Moderately High, High).
  - 4273 ○ For the maladaptive behavior index and maladaptive behavior subdomains the  
 4274 adaptive levels are: Average, Elevated or Clinically Significant.

- 4275 • Age Equivalent: the age at which the raw score is average. Not applicable for the  
4276 maladaptive behavior index and maladaptive behavior subdomains.
- 4277 For each adaptive behavior domain, the sum of the v-scale scores of the subdomains is used  
4278 along with the patients' age to obtain the following:
- 4279 • Standard Score (standardized by age). Ranging from a score of 20 to 160.
- 4280 • 90% CI for the domain standard score.
- 4281 • Percentile Rank: the percentage of people whom the individual outperformed in his  
4282 or her age group.
- 4283 • Adaptive Level (Low, Moderately Low, Adequate, Moderately High, High).
- 4284 • Stanine: whole number score ranging from 1 to 9 and representing a specific range of  
4285 percentile ranks.

4286 An adaptive behavior composite can then be obtained using the sum of the adaptive behavior  
4287 domain standard scores (excluding the motor skills domain for patients  $\geq 7$  years of age).  
4288 The same derived information as the adaptive behavior domain is obtained for the adaptive  
4289 behavior composite.

4290 For the maladaptive behavior index, all items within each section must be answered for a  
4291 raw score to be calculated. If any of the items are missing then the maladaptive behavior  
4292 index score will be missing.

4293 For the adaptive behavior subdomains, the derivation of the raw score allows for up to  
4294 2 missing values or answers of "Don't Know" within the items used for scoring. If there are  
4295 more than 2 missing values or answers of "Don't Know" then the raw score will not be  
4296 calculated and the subdomain score, domain score and adaptive behavior composite score  
4297 will be missing.

4298 The adaptive levels corresponding to the v-scale scores and standard scores are presented in  
4299 Table 6.

4300 **Table 6 Adaptive Levels by v-Scale Scores and Standard Scores**

| Adaptive Level                     | v-Scale Score for Subdomains and Maladaptive Behavior Index | Standard Score for Domains and Adaptive Behavior Composite |
|------------------------------------|-------------------------------------------------------------|------------------------------------------------------------|
| <b>Adaptive Behavior Domains</b>   |                                                             |                                                            |
| Low                                | 1 to 9                                                      | 20 to 70                                                   |
| Moderately Low                     | 10 to 12                                                    | 71 to 85                                                   |
| Adequate                           | 13 to 17                                                    | 86 to 114                                                  |
| Moderately High                    | 18 to 20                                                    | 115 to 129                                                 |
| High                               | 21 to 24                                                    | 130 to 160                                                 |
| <b>Maladaptive Behavior Domain</b> |                                                             |                                                            |
| Clinically Significant             | 21 to 24                                                    |                                                            |
| Elevated                           | 18 to 20                                                    |                                                            |
| Average                            | 1 to 17                                                     |                                                            |

4301

4302 The v-scale score from the 11 adaptive behavior subdomains, 3 maladaptive behavior  
4303 subdomains and the maladaptive behavior index, and the standard score from the 4 adaptive  
4304 behavior domains and the adaptive behavior composite, recorded at each visit, will be  
4305 summarized, on a continuous scale, by treatment group. The change from baseline (Visit 2)  
4306 will also be included.

4307 The change from baseline to the end of treatment visit and last visit (if different to the end of  
4308 treatment), for the 4 adaptive behavior domains, the adaptive behavior composite and the



4309 maladaptive behavior index only, will be analyzed using the same ANCOVA approach as  
4310 specified in Section 5.5.3.2.7. Analysis performed at the last visit will be considered the  
4311 main analysis for this endpoint, with the analysis at the end of treatment visit considered a  
4312 sensitivity analysis.

4313 The adaptive level from the 11 adaptive behavior subdomains, 4 adaptive behavior domains,  
4314 the adaptive behavior composite, the 3 maladaptive behavior subdomains and the  
4315 maladaptive behavior index, recorded at each visit, will be summarized, on a categorical  
4316 scale, by treatment group.

4317 The adaptive level from the 4 adaptive behavior domains, the adaptive behavior composite and the  
4318 maladaptive behavior index only will be analyzed using ordinal logistic regression. Factors for  
4319 treatment and age group will be included along with the baseline adaptive level as a covariate. The  
4320 estimated odds ratios (GWP42003-P groups vs. placebo), 95% CI for the odds ratios, and the p-  
4321 values testing the null hypothesis that the odds ratio is equal to 1, will be presented.

4322 Each adaptive level for adaptive behavior will be coded with a score from 1 to 5, where  
4323 1 = Low, and 5 = High. Each adaptive level for the maladaptive behavior index will be  
4324 coded with a score from 1 to 3, where 1 = Clinically Significant, and 3 = Average.

4325 The individual responses within each domain will not be listed, only the derived information  
4326 for each subdomain and domain will be listed.

#### 4327 **5.5.3.2.11 Cognitive Assessment Battery**

4328 The cognitive assessment battery will be administered at Visit 2 (baseline) and Visit 8 (end  
4329 of treatment). The items are age specific and the age of the patient at entry is the age used  
4330 when choosing the items to be given. Children and adults are to complete the battery as  
4331 able. It is expected that a number of patients will only be able to complete part of the battery  
4332 and some may not be able to complete it at all. Parents and/or caregivers are to complete  
4333 certain items.

4334 The battery items will only be administered to a sub-group of sites that have the expertise to  
4335 conduct the test. Assessments are conducted by an experienced psychometrician.

4336 A summary of the patient and parent measures are given in Table 7.

4337  
4338**Table 7 Neuropsychological Protocol for Epilepsy Patients Treated with Cannabidiol – Patient and Parent Measures**

| Category                        | Function                                   | Measures                                                                                                                                                                                                                                                                                                                                               | Age Range        |
|---------------------------------|--------------------------------------------|--------------------------------------------------------------------------------------------------------------------------------------------------------------------------------------------------------------------------------------------------------------------------------------------------------------------------------------------------------|------------------|
| Patient                         | Intelligence<br><b>IQ</b>                  | Wechsler Preschool and Primary Scale of Intelligence – Fourth Edition (WPPSI-4) Vocabulary, Matrix Reasoning                                                                                                                                                                                                                                           | 2;6 - 5;11 years |
|                                 |                                            | Wechsler Abbreviated Scale of Intelligence – Second Edition (WASI-2) Vocabulary, Matrix Reasoning (Including Wechsler: ‘Digit Span’ subtest from Wechsler Intelligence Scale for Children – Fourth Edition (WISC-4) and Wechsler Adult Intelligence Scale - Fourth Edition (WAIS-4); ‘Coding’ subtest from WISC-4 & WAIS-4; ‘Bug Search’ from WPPSI-4) | 6 - adult        |
|                                 | Attention/Executive<br><b>Trail Making</b> | Trail Making Test Delis–Kaplan Executive Function System (D-KEFS)                                                                                                                                                                                                                                                                                      | 9 - adult        |
|                                 | Language<br><b>Naming Fluency</b>          | Expressive One-Word Picture Vocabulary Test-4th Edition                                                                                                                                                                                                                                                                                                | 2 - adult        |
|                                 |                                            | NEPSY-2 Word Generation                                                                                                                                                                                                                                                                                                                                | 2 - 5 years      |
|                                 |                                            | F-A-S and Animals                                                                                                                                                                                                                                                                                                                                      | 6 - adult        |
|                                 | Visual-Spatial<br><b>VMI</b>               | Developmental Test of Visual Motor Integration-6                                                                                                                                                                                                                                                                                                       | 2 - adult        |
| Fine Motor Speed<br><b>Pegs</b> | Purdue Pegboard                            | 4 - adult                                                                                                                                                                                                                                                                                                                                              |                  |
| Parent                          | Executive                                  | Behavior Rating Inventory of Executive Function (Parent and Teacher)                                                                                                                                                                                                                                                                                   | 3 - 21 years     |
|                                 | Attention                                  | Attention deficit hyperactivity disorder (ADHD) Checklist (Parent and Teacher)                                                                                                                                                                                                                                                                         | All ages         |
|                                 | Mood/Anxiety                               | Behavior Assessment System for Children – Second Edition (BASC-2) (Parent and Teacher)                                                                                                                                                                                                                                                                 | 3 - 21 years     |
|                                 | Free-form report                           | Behavior Report Form (Parent and Teacher)                                                                                                                                                                                                                                                                                                              | All ages         |

4339 The following patient measures will be summarized, on a continuous scale, by treatment group at  
4340 each visit and including the change from baseline using the score recorded on the CRF:

- 4341     • Intelligence:
- 4342         ○ WPPSI-4 T score:
- 4343             ▪ Receptive Vocabulary.
- 4344             ▪ Matrix Reasoning.
- 4345             ▪ Bug Search.
- 4346         ○ WASI-2 T score:
- 4347             ▪ Vocabulary.
- 4348             ▪ Matrix Reasoning.
- 4349         ○ WISC-4 and WAIS-4:
- 4350             ▪ Coding scaled score.
- 4351             ▪ Digit Span (Forward, Backward, Longest forward, Longest Backward).
- 4352     • Attention/Executive:
- 4353         ○ D-KEFS scaled scores.
- 4354     • Language:
- 4355         ○ Expressive One-Word Picture Vocabulary Test-4th Edition scaled score.

- 4356                   ○ NEPSY-2 Word Generation scaled score.
- 4357           ● Visual-Spatial:
  - 4358                   ○ Developmental Test of Visual Motor Integration-6 standard score.
- 4359           ● Fine Motor Speed:
  - 4360                   ○ Dominant hand, non-dominant hand and both hands Z scores.

4361           The following parent measures will be summarized, on a continuous scale, by treatment group at  
4362           each visit and including the change from baseline using the scored recorded on the CRF:

- 4363           ● Executive:
  - 4364                   ○ Behavior Rating Inventory of Executive Function T scores for indexes and  
4365                   composite.
- 4366           ● Mood/Anxiety:
  - 4367                   ○ BASC-2 T scores for composite scores.

4368           The behavior report form will be summarized, on a categorical scale, by treatment at each visit.  
4369           The ADHD checklist consists of 18 questions, questions 1 to 9 relate to inattention and questions 10  
4370           to 18 relate to hyperactivity. A derived Inattention and Hyperactivity score can be calculated by  
4371           taking the sum of the corresponding question responses, where 0 = ‘Not at all’ and 3 = ‘Very much’  
4372           and dividing by 9. A combined score can also be calculated by taking the sum of the responses from  
4373           questions 1 to 18 and dividing by 18. The Inattention, Hyperactivity and combined scores will be  
4374           summarized, on a continuous scale, at each visit and by treatment group. The change from baseline  
4375           (Visit 2) will also be included.

#### 4376   **5.5.4 Exploratory Efficacy Endpoints**

##### 4377   **5.5.4.1 Time to Baseline Convulsive Seizure Frequency**

4378           Time to baseline convulsive seizure frequency is defined as the number of reported days in IVRS,  
4379           from Day 1, that it takes for the cumulative number of convulsive seizures experienced to be greater  
4380           than or equal to the number of seizures (per 28 days) experienced during the baseline period and will  
4381           be calculated as:

4382           Date criterion was achieved – Date of Day 1 – Number of unreported days in IVRS between Day 1  
4383           and date criterion was achieved + 1

4384           Patients who complete the study without experiencing greater than or equal to the number of seizures  
4385           (per 28 days) experienced during the baseline period, or who withdraw from the study, will be  
4386           censored at the earlier of:

- 4387           ● Day 99.
- 4388           ● The date of last dose as recorded on the ‘End of Treatment Study Outcome’ CRF page.

4389           The exact day used for censoring will be the day obtained from above minus the number of  
4390           unreported days in IVRS between Day 1 and the day obtained from above.

4391           Time to baseline convulsive seizure frequency will be summarized on a continuous scale, by  
4392           treatment group, for patients in the ITT analysis set. The lower and upper quartiles will also be  
4393           presented. The Kaplan–Meier estimates for the median time to baseline convulsive seizure frequency  
4394           will be presented along with 95% CIs for the median and p-values from log-rank tests comparing  
4395           each GWP42003-P group with placebo. A Kaplan–Meier plot will also be produced.

4396           The above will be repeated using Day 15 instead of Day 1 as the start day for counting the  
4397           cumulative number of convulsive seizures.

##### 4398   **5.5.4.2 Number of Convulsive Seizure Free Days**

4399           The number of convulsive seizure free days during each period will be based on 28-day averages and

4400 calculated as:  
 4401  $(\text{Number of seizure free days in the period} \div \text{Number of reported days in IVRS in the period}) \times 28$   
 4402 The change from baseline in convulsive seizure free days per 28 days will be analyzed for  
 4403 the treatment period using an ANCOVA approach. The model will include baseline and age  
 4404 group as covariates and treatment group as fixed factor.  
 4405 The estimated least squares means, treatment difference, together with the 95% CIs and p-value will  
 4406 be presented.  
 4407 The analysis will be repeated for the maintenance period. Analysis on the maintenance period will  
 4408 include only patients who have at least 7 days of seizure data within the maintenance period.

### 4409 **5.5.5 Subgroup Analyses**

4410 To assess the degree of effect heterogeneity, effect modifier analyses are proposed, on the  
 4411 ITT analysis set, for the primary efficacy endpoint and the key secondary efficacy endpoint  
 4412 of  $\geq 50\%$  reduction in convulsive seizure frequency.  
 4413 For the primary efficacy endpoint, the effect modifier analysis will be performed using the  
 4414 negative binomial regression analysis as described in Section 5.5.2. The model will be  
 4415 updated to include covariates for each level of the effect being tested (excluding a reference  
 4416 level), individually and with interactions with time, interactions with treatment arm and  
 4417 interactions with time and treatment. A separate model will be used for testing each effect.  
 4418 The treatment ratios (GWP42003-P vs. placebo), percent reduction and 95% confidence  
 4419 intervals will be presented for each level of the effect. In addition, the effect by time by  
 4420 treatment arm interaction p-value, testing the hypothesis that the effect level treatment ratios  
 4421 are homogeneous, will be presented.  
 4422 For the key secondary efficacy endpoint of  $\geq 50\%$  reduction in convulsive seizure frequency,  
 4423 patients with a  $\geq 50\%$  reduction in seizure frequency will be modelled using logistic  
 4424 regression, including stratified age group and treatment arm as covariates. The model will  
 4425 also include covariates for each level of the effect being tested (excluding a reference level),  
 4426 individually and with interactions with treatment arm. A separate model will be used for  
 4427 testing each effect. The number and percent of responders, and odds ratios and 95%  
 4428 confidence intervals will be presented for each level of the effect. In addition, the effect by  
 4429 treatment arm interaction p-value, testing the hypothesis that the effect level odds ratios are  
 4430 homogeneous, will be presented.  
 4431 The following effects will be tested:

- 4432 • Age group (2-5 years, 6-12 years and 13-18 years). Note: stratified age group will be  
 4433 removed as a covariate for this model.
- 4434 • Sex (Male, Female).
- 4435 • Region (US, Rest of the World).
- 4436 • Clobazam use (Yes, No).
- 4437 • Valproic acid use (Yes, No).
- 4438 • Stiripentol use (Yes, No).
- 4439 • Clobazam use and Stiripentol use (Yes/Yes, Yes/No, No/Yes, No/No).
- 4440 • Levetiracetam use (Yes, No).
- 4441 • Topiramate use (Yes, No).
- 4442 • Baseline average convulsive seizure frequency per 28 days ( $\leq$  observed Tertile 1,  $>$   
 4443 observed Tertile 1 to  $\leq$  observed Tertile 2,  $>$  observed Tertile 2). The observed tertile  
 4444 values will be rounded to the nearest whole number.

- 4445 • Number of concurrent AEDs (<3, ≥3).
- 4446 • Number of prior AEDs (<4, ≥4).
- 4447 • Number of prior and concurrent AEDs (<8, ≥8).

## 4448 **5.6 Safety Evaluation**

### 4449 **5.6.1 Exposure to IMP**

4450 Patients are required to take IMP twice daily (morning and evening). The first dose will be  
 4451 taken in the clinic on Day 1. The date of final dose in the treatment phase will be recorded  
 4452 on the CRF. The date of final dose, for patients who enter the taper period, will be recorded  
 4453 on the CRF at the end of taper visit.

4454 The total number of dosing days in the treatment phase will be calculated as:

4455  $(\text{Date of last dose in the treatment phase} - \text{Date of Day 1}) + 1$

4456 The date of last dose in the treatment phase will be obtained from the CRF at the end of  
 4457 treatment visit.

4458 Any missed doses during treatment should be recorded on the 'IMP Missed Doses Log' CRF  
 4459 page. The number of days with any missed doses and the number of days where IMP was  
 4460 not taken in the AM nor PM will be summarized based on data in the treatment phase (Day 1  
 4461 to end of treatment visit).

4462 In addition, the number of days in which IMP was taken at least once (AM or PM) will be  
 4463 summarized and calculated as:

4464 Total number of dosing days – the number of days where IMP was not taken in the AM nor  
 4465 PM

4466 The number of days in which IMP was taken both AM and PM will be summarized and  
 4467 calculated as:

4468 Total number of dosing days – the number of days with any missed doses

4469 The above summaries will be presented for all patients and repeated for patients who  
 4470 completed the treatment phase.

4471 In addition, the expected daily volume of IMP to be administered during the treatment phase,  
 4472 once a patient has titrated to target dose, will be summarized by treatment.

4473 The expected daily volume of IMP will be calculated as:

4474  $2 \times [\text{Weight (kg) at Day 1} \div 10 \text{ and rounded to the nearest 0.1}]$

4475 for patients randomized to the 20 mg/kg/day dose level and:

4476  $2 \times [\text{Weight (kg) at Day 1} \div 20 \text{ and rounded to the nearest 0.1}]$

4477 for patients randomized to the 10 mg/kg/day dose level.

4478 Finally, IMP compliance will be summarized by treatment and calculated as:

4479  $100 \times (\text{Number of days IMP taken at least once} + \text{number of days IMP taken both AM and}$   
 4480  $\text{PM}) \div (2 \times \text{day of completion or withdrawal during the treatment period})$

### 4481 **5.6.2 Adverse Events**

4482 All reported AEs will be classified by system organ class (SOC), preferred term and lower  
 4483 level term using Version 17.1 of MedDRA.

4484 Summaries will be presented by treatment group as well as SOC and preferred term.

4485 A treatment emergent AE (TEAE) is defined as an AE with a start date on or after the first  
 4486 dose of IMP. If an AE has a partial start date and it is unclear from the partial date (or the  
 4487 stop date) whether the AE started prior to or post first dose of IMP then the AE will be  
 4488 considered treatment emergent. If the start date of the AE is the same as the date of first  
 4489 dose of IMP and the plausible relationship to IMP is marked on the CRF as "Prior to study

4490 medication” then the AE will not be considered treatment emergent.

4491 An AE will be considered treatment-related if the plausibility relationship to IMP is recorded  
4492 on the CRF as ‘yes’. If the data on plausibility relationship to IMP is missing then the AE  
4493 will be considered treatment-related.

4494 An AE will be considered leading to permanent discontinuation of IMP if the action taken  
4495 with IMP is recorded on the CRF as ‘study medication stopped’ or the outcome is recorded  
4496 on the CRF as ‘patient died’.

4497 An AE will be considered leading to IMP dose reduction excluding permanent  
4498 discontinuation if the action taken with IMP is recorded on the CRF as ‘dose reduced’, ‘dose  
4499 reduced temporarily’ or ‘study medication interrupted’.

4500 An AE will be considered leading to temporary IMP dose reduction if the action taken with  
4501 IMP is recorded on the CRF as ‘dose reduced temporarily’.

4502 An AE will be considered leading to permanent IMP dose reduction excluding permanent  
4503 discontinuation if the action taken with IMP is recorded on the CRF as ‘dose reduced’.

4504 An AE will be considered fatal if the outcome is recorded on the CRF as ‘patient died’.

4505 The following summaries will be generated (counts are by patient unless specified  
4506 otherwise):

4507 • Overall summary of AEs, including number of patients reporting each of; TEAEs,  
4508 treatment-related TEAEs, TEAEs leading to withdrawal, treatment-related TEAEs  
4509 leading to withdrawal, serious TEAEs, treatment-related serious TEAEs.

4510 • Summary of TEAEs.

4511 • Summary of TEAEs by event.

4512 • Summary of treatment-related TEAEs.

4513 • Summary of treatment-related TEAEs by event

4514 • Summary of TEAEs by maximal severity.

4515 • Summary of TEAEs by sex.

4516 • Summary of serious TEAEs.

4517 • Summary of serious TEAEs by event.

4518 • Summary of non-serious TEAEs.

4519 • Summary of non-serious TEAEs by event.

4520 • Summary of treatment-related serious TEAEs.

4521 • Summary of treatment-related serious TEAEs by event.

4522 • Summary of TEAEs leading to permanent discontinuation of IMP.

4523 • Summary of treatment-related TEAEs leading to permanent discontinuation of IMP.

4524 • Summary of TEAEs leading to IMP dose reduction excluding permanent  
4525 discontinuation (by resolution and overall).

4526 • Summary of treatment-related TEAEs leading to IMP dose reduction excluding  
4527 permanent discontinuation (by resolution and overall).

4528 • Summary of TEAEs leading to temporary IMP dose reduction (by resolution and  
4529 overall).

- 4530 • Summary of treatment-related TEAEs leading to temporary IMP dose reduction (by  
4531 resolution and overall).
- 4532 • Summary of TEAEs leading to permanent IMP dose reduction excluding permanent  
4533 discontinuation (by resolution and overall).
- 4534 • Summary of treatment-related TEAEs leading to permanent IMP dose reduction  
4535 excluding permanent discontinuation (by resolution and overall).
- 4536 • Summary of fatal TEAEs.
- 4537 • Summary of TEAEs by time of first onset of AE.
- 4538 • Summary of TEAEs by time to AE resolution.
- 4539 • Summary of TEAEs reported in  $\geq 2\%$  of patients (after rounding) in the  
4540 GWP42003-P treatment groups and where the incidence is greater than the placebo  
4541 treatment group.
- 4542 • List of patients experiencing TEAEs by SOC and preferred term.
- 4543 • Summary of pre-treatment AEs.
- 4544 For the summary of TEAEs by maximal severity, for each patient, the worst severity  
4545 recorded by preferred term, SOC and overall will be used for summary purposes. If severity  
4546 is missing, the worst case (severe) will be assumed.
- 4547 For summaries by resolution, AEs with an outcome of ‘recovered’ or ‘recovered with  
4548 sequelae’ will be summarized as ‘Resolved’ and AEs with an outcome of ‘continuing’,  
4549 ‘patient died’ or those with a missing outcome will be summarized as ‘Not resolved’.
- 4550 For the summary of TEAEs by time of first onset of AE, data will be summarized under the  
4551 following categories:
- 4552 • Weeks 1–2 (Day 1–14).
- 4553 • Weeks 3–6 (Day 15–42).
- 4554 • Weeks 7–10 (Day 43–70).
- 4555 • Weeks 11–14 (Day 71–98).
- 4556 • >14 weeks (> Day 98).
- 4557 The time to first onset of AE will be calculated for TEAEs as:  
4558  $\text{Start date of AE} - \text{Date of first dose of IMP} + 1$
- 4559 If patients have multiple occurrences of an AE then the AE will be counted once for the first  
4560 occurrence only. Percentages will be based on the number of patients in the safety analysis  
4561 set who have a visit or follow-up call within each time period above.
- 4562 For the summary of TEAEs by time to AE resolution, data will be summarized under the  
4563 following categories:
- 4564 • 1 week ( $\leq 7$  days).
- 4565 • 2 weeks (8–14 days).
- 4566 • 3 weeks (15–21 days).
- 4567 • 4 weeks (22–28 days).
- 4568 • >4 weeks (>28 days).
- 4569 • Ongoing (for AEs not resolved).

4570 The time to AE resolution will be calculated for TEAEs as:

4571 
$$\text{Stop date of AE} - \text{Start date of AE} + 1$$

4572 If patients have multiple occurrences of an AE then the AE will be counted once for the  
4573 occurrence with the longest time to AE resolution. However, if any of the AEs are not  
4574 resolved then the AE will be counted once within the ‘Ongoing’ category.

4575 The start and stop day of the AE relative to the first dose of IMP (as recorded on the CRF)  
4576 will be calculated as per Section 5.1.2. For partial dates, if it is clear from the partial date  
4577 that the start/stop day was prior to the first dose of IMP, then ‘pre’ will be listed, similarly if  
4578 it is clear that the event was post the first dose of IMP then ‘post’ will be listed as the  
4579 start/stop day as appropriate.

4580 All AEs will be listed. Listings will include the start and stop day of the AE, a flag for  
4581 treatment emergence, and limited demographic information about the patient (age, sex, race  
4582 and weight at screening). A separate listing will be provided for pre-treatment AEs, serious  
4583 AEs and events of special interest (see Appendix 1).

### 4584 **5.6.3 Clinical Laboratory Evaluation**

#### 4585 **5.6.3.1 Hematology and Biochemistry**

4586 Hematology and biochemistry safety parameters are measured at Visit 1 (screening), Visit 2  
4587 (Day 1), Visit 3, Visit 4, Visit 6, Visit 8 (end of treatment) and Visit 9 (end of taper).

4588 Summaries will be presented by treatment group for each laboratory parameter at each visit.  
4589 Change from baseline to each post-baseline visit will also be presented.

4590 If values for any of the parameters are below or above the limit of quantification of the assay  
4591 (BLQ or ALQ), then they will be included in the summary tables at the BLQ or ALQ  
4592 thresholds. However, for estimated creatinine clearance, results >60 are reported only as  
4593 ‘>60’. Hence, estimated glomerular filtration rate (eGFR) will be calculated as:

4594 For patients who are  $\geq 18$  years at screening, the Cockcroft-Gault equation will be used:

4595 
$$\text{eGFR (mL/min)} = [(140 - \text{age}) \times \text{weight} \times k] / \text{serum creatinine}$$

4596 where age is measured in years, weight is measured in kg,  $k = 1.23$  if male,  $k = 1.04$  if  
4597 female and serum creatinine is measured in  $\mu\text{mol/L}$ . eGFR will be indexed to body surface  
4598 area (BSA) using the following formula:

4599 
$$\text{eGFR (mL/min/1.73m}^2\text{)} = \text{eGFR (mL/min)} \times 1.73/\text{BSA}$$

4600 where BSA is based on the Du Bois and Du Bois formula:

4601 
$$\text{weight}^{0.425} \times \text{height}^{0.725} \times 0.007184$$

4602 where weight is measured in kg and height is measured in cm.

4603 For patients who are <18 years at screening, the revised Schwartz estimate will be used:

4604 
$$(36.2 \times \text{height}) / \text{serum creatinine}$$

4605 where height is measured in cm and serum creatinine is measured in  $\mu\text{mol/L}$ . When  
4606 available, enzymatic serum creatinine will be used. Otherwise, the Jaffe serum creatinine  
4607 will be used. If height or weight is missing at the collection date, then the closest value to  
4608 the sample date will be used. If there is more than one height or weight value on the same  
4609 day or 2 height or weight values equally distant from the collection date, then the mean will  
4610 be used. The eGFR will be summarized separately for each method.

4611 Where laboratory samples are repeated, the baseline value is defined as the final recorded  
4612 value prior to the first dose of IMP. If the Visit 2 data are missing then, where possible, the  
4613 Visit 1 measurements will be used as baseline.

4614 Shift tables for hematology and biochemistry parameters will be constructed, based upon  
4615 normal ranges and GW toxicity limits (See Section 8), to determine the categorical shifts  
4616 from baseline to each post-baseline visit. Values will be categorized as ‘Normal’, ‘Low’ or  
4617 ‘High’ based on normal ranges and ‘Toxically Low’, ‘Toxically Normal’ or ‘Toxically High’



4618 based on GW toxicity limits.

4619 For eGFR, results will be assigned to the following grades:

- 4620 • Normal:  $>60$  ml/min/1.73 m<sup>2</sup>
- 4621 • Grade 1: 60 ml/min/1.73 m<sup>2</sup>
- 4622 • Grade 2:  $\geq 30$  and  $<60$  ml/min/1.73 m<sup>2</sup>
- 4623 • Grade 3:  $\geq 15$  and  $<30$  ml/min/1.73 m<sup>2</sup>
- 4624 • Grade 4:  $<15$  ml/min/1.73 m<sup>2</sup>

4625 A separate shift table will be produced for eGFR based upon the above grades to determine  
4626 the categorical shifts from baseline to each post-baseline visit.

4627 Scatter plots will be produced for each laboratory parameter presenting the maximum post  
4628 baseline result divided by the upper limit of normal (ULN) on the Y-axis, and the baseline  
4629 result divided by the ULN on the X-axis. However, for prothrombin international  
4630 normalized ratio (INR), both axes will present the raw results rather than dividing by ULN.  
4631 An additional table will be produced, summarizing the number of patients meeting the  
4632 following criteria:

- 4633 • Alanine aminotransferase (ALT)  $> 1 \times$ ULN at baseline
- 4634 • Aspartate aminotransferase (AST)  $> 1 \times$ ULN at baseline
- 4635 • AT  $> 1 \times$ ULN at baseline
- 4636 • Treatment emergent ALT  $> 3 \times$ ULN,  $> 5 \times$ ULN and  $> 8 \times$ ULN
- 4637 • Treatment emergent AST  $> 3 \times$ ULN,  $> 5 \times$ ULN and  $> 8 \times$ ULN
- 4638 • Treatment emergent AT  $> 3 \times$ ULN,  $> 5 \times$ ULN and  $> 8 \times$ ULN
- 4639 • Treatment emergent AT  $> 3 \times$ ULN and either bilirubin  $> 2 \times$ ULN or INR  $> 1.5$

4640 where AT is AST or ALT, and treatment emergent is defined as criteria not met at baseline,  
4641 but met at any time post-baseline. The above will be summarized overall and for the  
4642 following subgroups: Sex (Male, Female).

- 4643 • Valproic acid use (Yes, No).
- 4644 • Clobazam use (Yes, No).
- 4645 • Valproic acid use and Clobazam use (Yes/Yes, Yes/No, No/Yes, No/No).
- 4646 • Patients taking 3 or more current AEDs.
- 4647 • Patients taking 4 or more current AEDs.

4648 A separate table will be produced, by treatment group and visit, presenting the incidence of  
4649 patients with urinalysis or blood results indicative of a medical condition at Visit 1 and  
4650 indicative of an AE after Visit 1.

4651 All laboratory data will be listed; listings will include limited demographic information  
4652 about the patient (age, sex, race and weight at baseline). Abnormal laboratory values will be  
4653 listed separately. A further listing will be created for the laboratory reference ranges and  
4654 toxicity limits.

### 4655 **5.6.3.2 Urinalysis**

4656 Urinalysis is assessed, using dipsticks, at the same visits as biochemistry and hematology.

4657 Urinalysis results will be listed only.

### 4658 **5.6.3.3 Pregnancy Test and Urine THC Screen**

4659 Serum pregnancy test results and urine THC screen results will be summarized by treatment  
4660 group and visit.

## 4661 **5.6.4 Vital Signs, Other Physical Findings and Other Safety Data**

### 4662 **5.6.4.1 Vital Signs**

4663 Vital signs (systolic blood pressure, diastolic blood pressure, pulse rate, temperature and  
4664 respiratory rate) are measured at Visit 1 (screening), Visit 2 (Day 1), Visit 3, Visit 4, Visit 6,  
4665 Visit 8 (end of treatment) and Visit 9 (end of taper).

4666 At Visit 1 and Visit 2, systolic and diastolic blood pressure are collected in the sitting, supine  
4667 and standing positions. At all other visits, systolic and diastolic blood pressure are collected  
4668 in the sitting position only.

4669 Summaries will be presented by treatment group for each vital sign parameter at each visit.

4670 Change from baseline to each post-baseline visit will also be presented.

4671 A separate table will be produced, by treatment group and visit, presenting the incidence of  
4672 patients with vital signs indicative of a medical condition at Visit 1 and indicative of an AE  
4673 after Visit 1.

4674 Based on the criteria presented in Section 8, potentially clinically significant changes from  
4675 baseline in vital signs measurements and other defined flagged values will be identified at  
4676 each visit. The number of patients with a potentially clinically significant change from  
4677 baseline will be summarized by parameter, visit and treatment group. The number of  
4678 patients with at least one post-baseline flagged vital sign parameter value will be  
4679 summarized by parameter, flagged criteria and treatment group.

### 4680 **5.6.4.2 Electrocardiogram**

4681 An ECG will be performed at Visit 1 (screening), Visit 2 (Day 1), Visit 3, Visit 4, Visit 6,  
4682 Visit 8 (end of treatment) and Visit 9 (end of taper).

4683 Summaries will be presented by treatment group for ventricular rate, PR interval, QRS  
4684 duration, QT interval and QTcB, at each visit. Change from baseline to each post-baseline  
4685 visit will also be presented.

4686 A separate table will be produced, by treatment group and visit, presenting the incidence of  
4687 patients with an ECG indicative of a medical condition at Visit 1 and indicative of an AE  
4688 after Visit 1.

4689 Based on the criteria presented in Section 8, defined flagged values will be identified at each  
4690 visit. The number of patients with at least one post-baseline flagged ECG parameter value  
4691 will be summarized by parameter, flagged criteria and treatment group.

### 4692 **5.6.4.3 Physical Examination**

4693 A physical examination will be performed at Visit 1 (screening), Visit 2 (Day 1), Visit 3,  
4694 Visit 4, Visit 6, Visit 8 (end of treatment) and Visit 9 (end of taper).

4695 Any relevant findings at screening are included as part of the patient's medical history. Any  
4696 changes seen after screening that are indicative of an AE are to be recorded as such on the  
4697 AE form and included as part of the AE summaries.

4698 Additionally, height and weight are recorded as part of the physical examination. Height and  
4699 weight will be summarized and listed together with the vital signs parameters.

4700 Incidence of patients with a physical examination indicative of a medical condition at Visit 1

4701 and indicative of an AE after Visit 1 will be summarized by treatment group and visit.

#### 4702 **5.6.4.4 Columbia-Suicide Severity Rating Scale (Children's)**

4703 The C-SSRS is completed at Visit 1 (screening), Visit 2 (Day 1), Visit 3, Visit 4, Visit 6, Visit 8 (end  
4704 of treatment) and Visit 9 (end of taper), for patients who are 6 years and older and capable of  
4705 understanding and answering the questions, in the investigator's opinion. Questions are asked on  
4706 suicidal behavior, suicidal ideation and intensity of ideation. At the screening visit, questions are in  
4707 relation to lifetime experiences and all subsequent questioning in relation to the last assessment.  
4708 The following C-SSRS data will be summarized by treatment group at each visit for patients in the  
4709 safety analysis set:

- 4710     • Incidence of the following suicidal ideation:
- 4711         ○ Wish to be dead.
- 4712         ○ Non-specific active suicidal thoughts.
- 4713         ○ Active suicidal ideation with any methods (not plan) without intent to act.
- 4714         ○ Active suicidal ideation with some intent to act, without specific plan.
- 4715         ○ Active suicidal ideation with specific plan and intent.
- 4716     • Incidence of the following suicidal behavior:
- 4717         ○ Actual attempt.
- 4718         ○ Interrupted attempt.
- 4719         ○ Aborted attempt.
- 4720         ○ Preparatory acts or behavior.
- 4721         ○ Suicidal behavior.
- 4722         ○ Completed suicide.

4723 In addition, the number of patients with any suicidality, any suicidal ideation and any suicidal  
4724 behavior will be summarized by treatment group at screening, baseline and at any time post-baseline.  
4725 Suicidality is defined as at least one occurrence of suicidal behavior or suicidal ideation.

4726 The number of patients experiencing the following, at any time post-baseline, will also be  
4727 summarized:

- 4728     • Complete suicidality.
- 4729     • Emergence of suicidal ideation.
- 4730     • Worsening of suicidal ideation.
- 4731     • Emergence of suicidal behavior.

4732 Emergence of suicidal ideation is defined as having no suicidal ideation at baseline and having  
4733 reported any type of suicidal ideation at any time post-baseline. Worsening of suicidal ideation is  
4734 defined to occur when the most severe suicidal ideation rating at any time post-baseline is more  
4735 severe than its rating at baseline. Emergence of suicidal behavior is defined as having no suicidal  
4736 behavior at baseline and reporting any type of suicidal behavior at any time post-baseline. If the C-  
4737 SSRS was not completed at screening or baseline then the patient will not be included in summaries  
4738 of emergence or worsening of suicidal ideation or behavior.

#### 4739 **5.6.4.5 Growth and Development**

4740 IGF-1 levels will be analyzed as part of the clinical laboratory testing. IGF-1 levels will be  
4741 summarized on a continuous scale, including change from baseline, by treatment group.  
4742 Change from baseline to the end of treatment visit for IGF-1 levels will also be plotted against the  
4743 Tanner Stages, weight, and height recorded at baseline.

4744 The pubic hair growth (both sexes), genital (males only) and breast (females only) development of all  
 4745 adolescent patients (i.e., 10 to less than 18 years of age at the time of signing the informed consent  
 4746 form, or earlier if clinically indicated by onset of menarche or other signs of precocious puberty) will  
 4747 be assessed using Tanner Staging. The patients will undergo a discreet physical examination and be  
 4748 assigned a value under each category of Pubic Hair Growth (both sexes), Genitals (male patients  
 4749 only), and Breasts (female patients only).  
 4750 Patients will be examined at Visit 2 (Day 1) and Visit 8 (end of treatment). Once a patient reaches a  
 4751 score of V (i.e., 5) the examination need not be performed again.  
 4752 Tanner Stages will be summarized on a categorical scale, by treatment group.

#### 4753 **5.6.4.6 Menstruation**

4754 Caregivers will be asked if the female patient is menstruating and details will be recorded as part of  
 4755 their medical history (Visit 2); any changes in normal cycles will be captured at Visit 8 (end of  
 4756 treatment).  
 4757 Menstruation details will be summarized as appropriate, including any changes in normal cycles at  
 4758 the end of treatment, by treatment group.

#### 4759 **5.6.4.7 Cannabis Withdrawal Scale (18 Years)**

4760 The CWS is a 19-item scale with each item (withdrawal symptom) measured on a 0–10 NRS (0 =  
 4761 Not at all; 5 = Moderately; 10 = Extremely). The patient or their caregiver is asked to record the  
 4762 extent to which each withdrawal symptom was experienced in the last 24 hours and also to rate the  
 4763 negative impact on normal daily activities (i.e., 2 separate scores are recorded for each item using the  
 4764 same 0–10 NRS). Scores are calculated as the sum of the 19 items for each measure, i.e., each  
 4765 separate score has a theoretical maximum of 190.  
 4766 The CWS will be used at Visit 2, to establish a baseline score, and then again at Visit 9, the safety  
 4767 follow-up telephone call on Day 123 and Visit 10 for any patient completing the study or  
 4768 withdrawing early. Patients entering the OLE on the day of Visit 8 will continue taking IMP; in this  
 4769 instance withdrawal will be evaluated at the end of their participation in the OLE.  
 4770 The 2 derived scores, recorded at each visit, will be summarized, on a continuous scale, by treatment  
 4771 group. The change from baseline (Visit 2) will also be included.  
 4772 If any of the individual items are missing, for each measure, then the corresponding derived score  
 4773 will not be calculated.  
 4774 The summary will be presented separately for all patients with a completed scale and patients 18  
 4775 years of age.

#### 4776 **5.6.4.8 Pediatric Cannabinoid Withdrawal Scale (4–17 Years)**

4777 The PCWS was developed from the 19-item validated CWS (adults) that assesses mood, behavioral  
 4778 and physical symptoms associated with cannabis, which was based on the Marijuana Withdrawal  
 4779 Checklist. The modified 10-item PCWS was developed from a low literacy version of the CWS.  
 4780 Symptoms specific to adult cannabis withdrawal have been removed and the wording has been  
 4781 amended to be comprehensible to children of the specified age range.  
 4782 Ratings are based on a 4-point scale where 0 = none, 1 = a little bit, 2 = quite a bit, and 3 = a lot.  
 4783 This rating scale has been compacted from the original 11-point Likert scale used for the CWS in  
 4784 order to simplify the range of options to consider for potential intellectually disabled children. The  
 4785 PCWS was designed with epileptic children in mind as a tool to assess the safety of cannabinoid  
 4786 medications with respect to the stimulation of cannabinoid withdrawal syndrome when medications  
 4787 are withdrawn. As there may be a wide range of intellectual or developmental difficulties in severely  
 4788 epileptic children, from no intellectual or developmental impairment to extreme, the PCWS has been  
 4789 designed to be administered by a treating clinician, either directly to the child, or to the parent or  
 4790 caregiver of the child, reflecting on the child's symptoms within the chosen timeframe.  
 4791 A derived score is calculated as the sum of the 10 items and has a theoretical maximum score of 30.  
 4792 The PCWS will be used at Visit 2, to establish a baseline score, and then again at Visit 9, the safety  
 4793 follow-up telephone call on Day 123 and Visit 10 for any patient completing the study or

4794 withdrawing early. Patients entering the OLE on the day of Visit 8 will continue taking IMP; in this  
 4795 instance withdrawal will be evaluated at the end of their participation in the OLE.  
 4796 The derived score, recorded at each visit, will be summarized, on a continuous scale, by treatment  
 4797 group. The change from baseline (Visit 2) will also be included.  
 4798 If any of the individual items are missing, then the derived score will not be calculated.  
 4799 The summary will be presented separately for all patients with a completed scale and patients 4–17  
 4800 years of age.

## 4801 **5.7 Other Measures**

### 4802 **5.7.1 Concomitant Medication**

4803 Medications will be coded using the World Health Organization Drug Dictionary, Version  
 4804 June 2014.

4805 A medication will be considered concomitant if it has a start date on or after the first dose of  
 4806 IMP or if it was started prior to the first dose of IMP and was ongoing. If a medication has a  
 4807 partial or missing start/stop date and it is unclear from the date whether the medication was  
 4808 taken after the first dose of IMP then it will be considered concomitant.

4809 For summaries and listings of medications the following approach will be used to determine  
 4810 the Anatomical Therapeutic Chemical (ATC) term to be presented:

- 4811 • If coded to level 4 then the level 4 coded term will be presented.
- 4812 • If coding is not performed at level 4 but level 3 coding is present then level 3 coded  
 4813 term will be presented.
- 4814 • If coding is not performed at level 3 but level 2 coding is present then the level 2  
 4815 coded term will be presented.
- 4816 • If coding is not performed at level 2 but level 1 coding is present then the level 1  
 4817 coded term will be presented.

4818 Summaries of each of the following by ATC term and preferred term will be summarized by  
 4819 absolute counts (n) and percentages (%):

- 4820 • History of antiepileptic medications;
- 4821 • Concomitant antiepileptic medications;
- 4822 • Concomitant rescue medications; and
- 4823 • Other concomitant medications.

4824 The ATC term, preferred term, reported generic name and reported brand name will be  
 4825 listed.

4826 An additional summary table will be produced for concomitant antiepileptic therapies,  
 4827 displaying the number and percentage of patients with a vagus nerve stimulation device or  
 4828 on a ketogenic diet.

4829 The start day and stop day will be included in the listing according to Section 5.1.2. If the  
 4830 date is partial and the exact day is unknown then the text ‘pre’ or ‘post’ will replace the start  
 4831 or stop day if it is clear from the partial date that the medication started or stopped prior to or  
 4832 after the first dose of IMP.

### 4833 **5.7.2 Plasma Concentrations of Concomitant Antiepileptic Drugs**

4834 Blood sampling for AEDs will be performed at Visit 2 (Day 1), Visit 4, Visit 6 and Visit 8  
 4835 (end of treatment). For each AED, plasma concentrations will be summarized by treatment

4836 group at each visit for patients in the safety analysis set.

### 4837 **5.7.3 Caregiver Impression of Investigational Medicinal Product Palatability**

4838 The caregiver's impression of palatability of the IMP will be assessed at Visit 8 (end of treatment).

4839 The Caregiver will be asked the following question to be rated on a 5-point scale:

- 4840
- Overall, how acceptable did your child find the study medication?

4841 The possible responses are: Liked it a lot; Liked it; Neither liked nor disliked it; Didn't like it; Didn't  
4842 like it at all.

4843 The caregiver's impression of palatability of the IMP will be summarized, on a categorical scale, by  
4844 treatment group.

### 4845 **5.7.4 Study Medication Use and Behavior Survey**

4846 This form consists of 18 questions regarding the use of the IMP. The trained investigator or  
4847 study coordinator will complete this survey as an interview with the patient/caregiver at the  
4848 final dosing visit (Visit 8 or Visit 9, as applicable).

4849 The form will be completed for all patients 12 years of age and older in the study.

4850 Each question will be summarized, on a categorical scale, by treatment group. Percentages  
4851 will be based on the number of patients completing the survey, in each treatment group. The  
4852 summary will be presented separately for all patients with a completed form and patients 12  
4853 years of age and older.

### 4854 **5.7.5 Supplemental Drug Accountability Form**

4855 This form consists of 7 questions regarding various aspects of drug accountability and patient usage.  
4856 It is completed as part of an interview with the patient/caregiver when a triggering drug  
4857 accountability discrepancy is identified.

4858 The triggering drug accountability discrepancies are as follows:

- 4859
- Missing bottle(s).
  - Compliance issues where one or more bottles are used compared to what was the expected  
4860 use, according to the IVRS report and paper diary.
  - Returned IMP supply with evidence of tampering.
  - Greater than the target daily dose as recorded in the IVRS report and paper diary.

4864 The number of patients completing a form will be summarized by treatment group. The summary  
4865 will be presented separately for all patients with a completed form and patients 12 years of age and  
4866 older.

### 4867 **5.7.6 Supplemental Adverse Event Form**

4868 This form consists of 15 questions regarding the AE and use of IMP. It is completed as part of an  
4869 interview with the patient/caregiver when a triggering AE of interest is reported.

4870 The categories for triggering AEs of interest are:

- 4871
- Euphoria or inappropriate elation.
  - Inappropriate laughter or exhilaration.
  - Mood changes.
  - Drunk, high or intoxicated.
  - Hallucinations (visual or auditory), dissociations, disorientation, agitation.
  - Disturbance in cognition, memory, or attention.
- 4876

- 4877 • Drug abuse.
- 4878 • Drug withdrawal or drug withdrawal syndrome.
- 4879 • Addiction.
- 4880 • Overdose.
- 4881 • Misuse of IMP.
- 4882 • Thoughts of suicide, attempted suicide or suicide.

4883 The number of patients completing a form will be summarized by treatment group. The summary  
 4884 will be presented separately for all patients with a completed form and patients 12 years of age and  
 4885 older.

#### 4886 **5.7.7 Site Classification Form**

4887 The investigator reviews the applicable Supplemental Adverse Event Form or Supplemental  
 4888 Drug Accountability Form, and then completes a Site Classification Form. For each  
 4889 Supplemental Adverse Event Form or Supplemental Drug Accountability Form completed,  
 4890 there should be an associated Site Classification Form.

4891 The Site Classification Form requires the investigator to assign the finding to an appropriate  
 4892 classification and then to also assign the possible relationship to the IMP. The investigator is  
 4893 also required to indicate the level of the certainty of the classification.

4894 The number of patients completing a form and the possible relationship and level of the  
 4895 certainty for each category will be summarized, on a categorical scale, by treatment group.  
 4896 If more than one form is completed for a particular patient then they will be summarized  
 4897 under each category for all forms. However, if more than one form is completed with and  
 4898 assigned to the same category, then 'related' would be used over 'not related' and the highest  
 4899 level of certainty will be used for the corresponding chosen relationship. The summary will  
 4900 be presented separately for all patients with a completed form and patients 12 years of age  
 4901 and older.

#### 4902 **5.7.8 IVRS Compliance**

4903 The number of unreported days in IVRS, during the baseline and treatment periods, will be  
 4904 summarized, on a continuous and categorical scale, by treatment group for patients in the ITT  
 4905 analysis set. For the summary on a continuous scale, the lower and upper quartiles will also be  
 4906 presented.

4907 The percentage IVRS compliance, during the baseline and treatment periods, will also be  
 4908 summarized, on a continuous and categorical scale, and calculated as:

4909 
$$[\text{Number of reported days in IVRS} \div (\text{Number of reported days in IVRS} + \text{Number of unreported days in IVRS})] \times 100$$
  
 4910

#### 4911 **5.7.9 Meal Times**

4912 Patient meal times will be recorded for the day prior to and the day of Visit 2 (Day 1) and  
 4913 Visit 8 (end of treatment). Meal times will be listed only.

4914

## 4915 **5.8 Changes in the Conduct of the Study or Planned Analysis**

4916 The identification of 3 key secondary endpoints and the hierarchical testing procedure were not  
4917 defined in the protocol, but have been included in the SAP prior to unblinding.

4918 Upon blinded review of IVRS data for the number of convulsive seizures greater than 30 minutes in  
4919 duration and the number of non-convulsive seizures greater than 30 minutes in duration, it was  
4920 determined that there were insufficient numbers of patients reporting these seizures to perform  
4921 analyses planned in the protocol.

4922 Upon blinded review of the number of patients with inpatient epilepsy-related hospitalizations, it was  
4923 determined that there were insufficient numbers of patients to perform analyses planned in the  
4924 protocol.

4925 The protocol included changes from baseline in usage of rescue medication as an efficacy endpoint.  
4926 However, due to inconsistencies in the collection of this data, no analyses are proposed.

4927 The endpoint of number of patients experiencing a >25% worsening, -25 to +25% no change, 25-  
4928 50% improvement, 50-75% improvement or >75% improvement in convulsive seizures from  
4929 baseline has been updated to the following:

- 4930 • Number of patients experiencing a >25% increase,  $\geq 0$  to  $\leq 25\%$  increase, >0 to <25%  
4931 reduction,  $\geq 25$  to <50% reduction,  $\geq 50$  to <75% reduction or  $\geq 75\%$  reduction in convulsive  
4932 seizures from baseline.

## 4933 **6. References**

4934 <sup>1</sup> Rubin DB: Multiple imputation for nonresponse in surveys. John Wiley & Sons, New  
4935 York 1987.

4936 <sup>2</sup> Mogg R, Mehrotra DV (2007). Analysis of antiretroviral immunotherapy trials with  
4937 potentially non-normal and incomplete longitudinal data. Stat Med. 2007;26(3): 484-497.

4938 <sup>3</sup> Sabaz M, Cairns D, Lawson J, Nheu, N, Bleasel A, Bye A. Data instructions for the  
4939 quality of life in childhood epilepsy questionnaire – parent form.

4940

4941



4942 **7. Amendments**

4943 Notable changes to the SAP that were completed prior to unblinding, are given below.  
4944 Minor changes, clarifications and corrections are not listed.

| Date | Section | Description of Change |
|------|---------|-----------------------|
|------|---------|-----------------------|

4945  
4946

4947 **8. Attachments and Appendices**4948 **Appendix 1 Adverse Events of Special Interest – Abuse Liability**

|                                      |                                           |
|--------------------------------------|-------------------------------------------|
| <b>Withdrawal</b>                    | Drug withdrawal convulsions               |
|                                      | Drug withdrawal headache                  |
|                                      | Drug withdrawal maintenance therapy       |
|                                      | Drug withdrawal syndrome                  |
|                                      | Drug withdrawal syndrome neonatal         |
|                                      | Drug rehabilitation                       |
|                                      | Rebound effect                            |
|                                      | Steroid withdrawal syndrome               |
|                                      | Withdrawal arrhythmia                     |
|                                      | Withdrawal syndrome                       |
| <b>Drug abuse and dependence</b>     | Dopamine dysregulation syndrome           |
|                                      | Drug abuse                                |
|                                      | Drug abuser                               |
|                                      | Drug dependence                           |
|                                      | Drug dependence, antepartum               |
|                                      | Drug dependence, postpartum               |
|                                      | Intentional drug misuse                   |
|                                      | Intentional overdose                      |
|                                      | Maternal use of illicit drugs             |
|                                      | Neonatal complications of substance abuse |
|                                      | Polysubstance dependence                  |
|                                      | Substance abuse                           |
|                                      | Substance abuser                          |
|                                      | Accidental overdose                       |
|                                      | Dependence                                |
|                                      | Disturbance in social behaviour           |
|                                      | Drug administered at inappropriate site   |
|                                      | Drug detoxification                       |
|                                      | Drug diversion                            |
|                                      | Drug level above therapeutic              |
|                                      | Drug level increased                      |
|                                      | Drug screen                               |
|                                      | Drug screen positive                      |
|                                      | Drug tolerance                            |
|                                      | Drug tolerance decreased                  |
|                                      | Drug tolerance increased                  |
|                                      | Medication overuse headache               |
|                                      | Narcotic bowel syndrome                   |
|                                      | Needle track marks                        |
|                                      | Overdose                                  |
|                                      | Prescribed overdose                       |
|                                      | Prescription form tampering               |
|                                      | Substance use                             |
| Substance-induced mood disorder      |                                           |
| Substance-induced psychotic disorder |                                           |
| Toxicity to various agents           |                                           |

4949

4950

4951 **Appendix 2 Ranges for Clinically Significant Changes and Other Defined Flagged**  
 4952 **Values in Vital Signs**

4953 The range of values that will be used to identify clinically significant changes in vital signs  
 4954 parameters (See Section 5.6.4.1) are presented in Table 8.

4955 **Table 8 Ranges for Potentially Clinically Significant Changes in Vital Signs**  
 4956

| Vital Sign           | Range                             |
|----------------------|-----------------------------------|
| Sitting Systolic BP  | Change: < -20, > 20               |
| Sitting Diastolic BP | Change: < -10, > 10               |
| Pulse Rate           | Change: < -10, > 10               |
| Weight               | Percent Change: $\leq -7, \geq 7$ |

4957  
 4958 Defined flagged values that will be used to identify low or high vital signs parameters (See Section  
 4959 5.6.4.1) are presented in Table 9.

4960 **Table 9 Other Defined Flagged Values for Vital Signs**  
 4961

| Vital Sign           | Flag               |
|----------------------|--------------------|
| Sitting Systolic BP  | < 90, > 140, > 160 |
| Sitting Diastolic BP | < 50, > 90, > 100  |
| Pulse Rate           | < 60, > 100        |
| Temperature          | > 38.0, < 36.0     |
| Respiratory Rate     | < 12, > 20         |

4962  
 4963 **Appendix 3 Defined Flagged Values in ECG Parameters**

4964 Defined flagged values that will be used to identify low or high ECG parameters (See Section  
 4965 5.6.4.2) are presented in Table 10.

4966 **Table 10 Defined Flagged Values for ECG Parameters**  
 4967

| ECG Parameter | Flag                |
|---------------|---------------------|
| QTc           | > 450, > 480, > 500 |

4968  
 4969 **Appendix 4 Toxicity Criteria for Laboratory Parameters**

4970 The toxicity criteria that will be used to identify abnormal laboratory parameters are presented in  
 4971 Table 11 and Table 12.

4972 **Table 11 Toxicity Criteria for Biochemistry Parameters**

| Parameter             | Toxicity Decrease     | Toxicity Increase     |
|-----------------------|-----------------------|-----------------------|
| Chloride              | $\leq 0.96 \times LL$ | $\geq 1.04 \times UL$ |
| Calcium               | $\leq 0.89 \times LL$ | $\geq 1.16 \times UL$ |
| Sodium                | $\leq 0.96 \times LL$ | $\geq 1.04 \times UL$ |
| Potassium             | $\leq 0.90 \times LL$ | $\geq 1.10 \times UL$ |
| Glucose (mmol/L)      | $\leq 3.2$            | $\geq 16$             |
| Phosphate             | $\leq 0.79 \times LL$ |                       |
| Cholesterol           | $\leq 0.85 \times LL$ | $\geq 1.6 \times UL$  |
| AST                   |                       | $\geq 3 \times UL$    |
| ALT                   |                       | $\geq 3 \times UL$    |
| Lactate Dehydrogenase |                       | $\geq 2.6 \times UL$  |
| Alkaline phosphatase  |                       | $\geq 2 \times UL$    |

| Parameter           | Toxicity Decrease | Toxicity Increase |
|---------------------|-------------------|-------------------|
| Gamma GT            |                   | ≥2.6xUL           |
| Bilirubin           |                   | >2xUL             |
| Albumin             | ≤0.84xLL          |                   |
| Total protein       | ≤0.84xLL          | ≥1.16xUL          |
| Urea                |                   | ≥2.6xUL           |
| Blood urea nitrogen |                   | ≥2.6xUL           |
| Creatinine          |                   | ≥2.6xUL           |
| Uric acid           |                   | ≥1.16xUL          |

4973 UL = upper limit of reference range LL = lower limit of reference range

4974

4975

**Table 12 Toxicity Criteria for Hematology Parameters**

| Parameter                                                                    | Toxicity Decrease | Toxicity Increase |
|------------------------------------------------------------------------------|-------------------|-------------------|
| Hemoglobin (g/dL)                                                            | ≤9.4              |                   |
| Hematocrit (%)                                                               | ≤28               |                   |
| Red cell count                                                               | ≤0.84xLL          |                   |
| Mean corpuscular volume                                                      | ≤0.84xLL          | ≥1.11xUL          |
| Mean corpuscular hemoglobin                                                  | ≤0.84xLL          |                   |
| Mean corpuscular hemoglobin concentration                                    | ≤0.84xLL          |                   |
| Platelets (x10 <sup>9</sup> /L)                                              | ≤74               |                   |
| Prothrombin time                                                             |                   | >1.5xUL           |
| Prothrombin international normalized ratio                                   |                   | >1.5              |
| Total white blood cell count (x10 <sup>9</sup> /L)                           | ≤2.9              | ≥21               |
| Total neutrophil count (x10 <sup>9</sup> /L)                                 | ≤1.36             | ≥14.7             |
| Segmented neutrophil count (x10 <sup>9</sup> /L)                             | ≤0.75             | ≥12.3             |
| Eosinophils (x10 <sup>9</sup> /L)                                            |                   | ≥1.5              |
| Basophils (x10 <sup>9</sup> /L)                                              |                   | ≥0.31             |
| Monocytes (x10 <sup>9</sup> /L)                                              |                   | ≥2.1              |
| Lymphocytes (x10 <sup>9</sup> /L) for patients <18 years (auto hematology)   | ≤1.0              |                   |
| Lymphocytes (x10 <sup>9</sup> /L) for patients <18 years (manual hematology) | ≤0.2              |                   |
| Lymphocytes (x10 <sup>9</sup> /L) for patients ≥18 years                     | ≤0.2              |                   |

4976 UL = upper limit of reference range LL = lower limit of reference range

4977

4978 **Appendix 5 List of Tables, Listings and Figures**

4979 Lists of the tables, listings and figures to be provided are given below in Table 13, Table 14  
 4980 and Table 15, respectively.

4981 **Table 13 List of Tables**

| Table Number  | Title                                                                                                                            | Analysis Set            |
|---------------|----------------------------------------------------------------------------------------------------------------------------------|-------------------------|
| Table 1.1.1   | Summary of Patient Disposition – Number of Patients Screened and Randomized by Site                                              | All Screened Patients   |
| Table 1.1.2   | Summary of Patient Disposition – Number of Patients Screened and Randomized by Country                                           | All Screened Patients   |
| Table 1.2     | Summary of Patient Disposition – Reasons for Screen Failure                                                                      | All Screened Patients   |
| Table 1.3.1   | Summary of Patient Disposition – Numbers of Patients Randomized, Withdrawn or Completed the Treatment Period by Site             | All Randomized Patients |
| Table 1.3.2   | Summary of Patient Disposition – Numbers of Patients Randomized, Withdrawn or Completed the Treatment Period by Country          | All Randomized Patients |
| Table 1.4     | Summary of Overall Patient Disposition                                                                                           | All Randomized Patients |
| Table 2.1     | Summary of Important Protocol Deviations                                                                                         | All Randomized Patients |
| Table 2.2     | Summary of Analysis Sets                                                                                                         | All Randomized Patients |
| Table 3.1.1   | Summary of Demographic Data                                                                                                      | Safety Analysis Set     |
| Table 3.1.2   | Summary of Demographic Data                                                                                                      | ITT Analysis Set        |
| Table 3.1.3   | Summary of Demographic Data                                                                                                      | PP Analysis Set         |
| Table 3.2.1   | Summary of Baseline Characteristics                                                                                              | Safety Analysis Set     |
| Table 3.2.2   | Summary of Baseline Characteristics                                                                                              | ITT Analysis Set        |
| Table 3.2.3   | Summary of Baseline Characteristics                                                                                              | PP Analysis Set         |
| Table 4.1     | Summary of Dravet Syndrome History                                                                                               | Safety Analysis Set     |
| Table 4.2.1   | Summary of Seizure Types No Longer Occurring                                                                                     | Safety Analysis Set     |
| Table 4.2.2   | Summary of Current Seizure Types                                                                                                 | Safety Analysis Set     |
| Table 4.3     | Summary of Electroencephalography History                                                                                        | Safety Analysis Set     |
| Table 5.1     | Summary of Previous Significant Non-Epilepsy Medical or Surgical History Now Resolved                                            | Safety Analysis Set     |
| Table 5.2     | Summary of Significant Non-Epilepsy Medical or Surgical History – Current Conditions                                             | Safety Analysis Set     |
| Table 6.1     | Summary of History of Antiepileptic Medications                                                                                  | Safety Analysis Set     |
| Table 6.2     | Summary of Concomitant Antiepileptic Therapies                                                                                   | Safety Analysis Set     |
| Table 6.3     | Summary of Concomitant Antiepileptic Medications                                                                                 | Safety Analysis Set     |
| Table 6.4     | Summary of Concomitant Rescue Medications                                                                                        | Safety Analysis Set     |
| Table 6.5     | Summary of Other Concomitant Medications                                                                                         | Safety Analysis Set     |
| Table 7.1     | Summary of Treatment Compliance                                                                                                  | Safety Analysis Set     |
| Table 7.2     | Summary of IVRS Compliance                                                                                                       | ITT Analysis Set        |
| Table 8.1.1   | Summary of Convulsive Seizure Frequency                                                                                          | ITT Analysis Set        |
| Table 8.1.2   | Negative Binomial Regression Analysis of Convulsive Seizure Count During Baseline and Treatment Periods                          | ITT Analysis Set        |
| Table 8.2.1.1 | Summary of Convulsive Seizure Frequency                                                                                          | PP Analysis Set         |
| Table 8.2.1.2 | Negative Binomial Regression Analysis of Convulsive Seizure Count During Baseline and Treatment Periods                          | PP Analysis Set         |
| Table 8.2.2   | Analysis of Percentage Change from Baseline in Convulsive Seizure Frequency During the Treatment Period – Wilcoxon Rank-Sum Test | ITT Analysis Set        |

| <b>Table Number</b> | <b>Title</b>                                                                                                                                                                   | <b>Analysis Set</b> |
|---------------------|--------------------------------------------------------------------------------------------------------------------------------------------------------------------------------|---------------------|
| Table 8.2.3         | Analysis of Percentage Change from Baseline in Convulsive Seizure Frequency During the Treatment Period – Rank ANCOVA                                                          | ITT Analysis Set    |
| Table 8.2.4         | Analysis of Convulsive Seizure Frequency During the Treatment Period – Log-transformed ANCOVA                                                                                  | ITT Analysis Set    |
| Table 8.2.5         | Analysis of Percentage Change from Baseline in Convulsive Seizure Frequency During the Treatment Period – ANCOVA                                                               | ITT Analysis Set    |
| Table 8.2.6         | Negative Binomial Regression Analysis of Convulsive Seizure Count During Baseline and the Maintenance Periods                                                                  | ITT Analysis Set    |
| Table 8.2.7         | Negative Binomial Regression Analysis of Convulsive Seizure Count During Baseline and Treatment Periods After Imputing Unreported Days in IVRS                                 | ITT Analysis Set    |
| Table 8.2.8         | Analysis of Percentage Change from Baseline in Convulsive Seizure Frequency During the Treatment Period After Multiple Imputation to Account for MNAR – Wilcoxon Rank-Sum Test | ITT Analysis Set    |
| Table 8.2.9.1       | Summary of Convulsive Seizure Frequency                                                                                                                                        | Safety Analysis Set |
| Table 8.2.9.2       | Negative Binomial Regression Analysis of Convulsive Seizure Count During Baseline and Treatment Periods                                                                        | Safety Analysis Set |
| Table 9.1.1.1       | Summary of Total Seizure Frequency                                                                                                                                             | ITT Analysis Set    |
| Table 9.1.1.2       | Negative Binomial Regression Analysis of Total Seizure Count During Baseline and Treatment Periods                                                                             | ITT Analysis Set    |
| Table 9.1.2.1       | Summary of Total Seizure Frequency                                                                                                                                             | PP Analysis Set     |
| Table 9.1.2.2       | Negative Binomial Regression Analysis of Total Seizure Count During Baseline and Treatment Periods                                                                             | PP Analysis Set     |
| Table 9.1.3         | Negative Binomial Regression Analysis of Total Seizure Count During Baseline and Maintenance Periods                                                                           | ITT Analysis Set    |
| Table 9.2.1         | Summary and Analysis of Convulsive Seizure Treatment Responders and Convulsive Seizure Freedom During the Treatment Period                                                     | ITT Analysis Set    |
| Table 9.2.2         | Summary and Analysis of Convulsive Seizure Treatment Responders and Convulsive Seizure Freedom During the Treatment Period                                                     | PP Analysis Set     |
| Table 9.2.3         | Summary and Analysis of Convulsive Seizure Treatment Responders and Convulsive Seizure Freedom During the Maintenance Period                                                   | ITT Analysis Set    |
| Table 9.3.1.1       | Summary of the Caregiver Global Impression of Change                                                                                                                           | ITT Analysis Set    |
| Table 9.3.1.2       | Analysis of the Caregiver Global Impression of Change                                                                                                                          | ITT Analysis Set    |
| Table 9.3.2.1       | Summary of the Caregiver Global Impression of Change                                                                                                                           | PP Analysis Set     |
| Table 9.3.2.2       | Analysis of the Caregiver Global Impression of Change                                                                                                                          | PP Analysis Set     |
| Table 9.4.1         | Summary of Patients with Status Epilepticus                                                                                                                                    | ITT Analysis Set    |
| Table 9.4.2         | Summary of Occurrence of Status Epilepticus When Not Experienced During the Baseline Period                                                                                    | ITT Analysis Set    |
| Table 9.5.1         | Summary and Analysis of Total Seizure Treatment Responders and Total Seizure Freedom During the Treatment Period                                                               | ITT Analysis Set    |
| Table 9.5.2         | Summary and Analysis of Total Seizure Treatment Responders and Total Seizure Freedom During the Maintenance Period                                                             | ITT Analysis Set    |
| Table 9.6.1.1       | Summary of Non-Convulsive Seizure Frequency                                                                                                                                    | ITT Analysis Set    |
| Table 9.6.1.2       | Negative Binomial Regression Analysis of Non-Convulsive Seizure Count During Baseline and Treatment Periods                                                                    | ITT Analysis Set    |
| Table 9.6.2         | Negative Binomial Regression Analysis of Non-Convulsive Seizure Count During Baseline and Maintenance Periods                                                                  | ITT Analysis Set    |

| <b>Table Number</b> | <b>Title</b>                                                                                                                         | <b>Analysis Set</b> |
|---------------------|--------------------------------------------------------------------------------------------------------------------------------------|---------------------|
| Table 9.6.3         | Summary and Analysis of Non-Convulsive Seizure Treatment Responders and Non-Convulsive Seizure Freedom During the Treatment Period   | ITT Analysis Set    |
| Table 9.6.4         | Summary and Analysis of Non-Convulsive Seizure Treatment Responders and Non-Convulsive Seizure Freedom During the Maintenance Period | ITT Analysis Set    |
| Table 9.7.1.1.1     | Summary of Tonic-Clonic Seizure Frequency                                                                                            | ITT Analysis Set    |
| Table 9.7.1.1.2     | Negative Binomial Regression Analysis of Tonic-Clonic Seizure Count During Baseline and Treatment Periods                            | ITT Analysis Set    |
| Table 9.7.1.2       | Negative Binomial Regression Analysis of Tonic-Clonic Seizure Count During Baseline and Maintenance Periods                          | ITT Analysis Set    |
| Table 9.7.1.3       | Summary and Analysis of Tonic-Clonic Seizure Treatment Responders and Tonic-Clonic Seizure Freedom During the Treatment Period       | ITT Analysis Set    |
| Table 9.7.1.4       | Summary and Analysis of Tonic-Clonic Seizure Treatment Responders and Tonic-Clonic Seizure Freedom During the Maintenance Period     | ITT Analysis Set    |
| Table 9.7.2.1.1     | Summary of Tonic Seizure Frequency                                                                                                   | ITT Analysis Set    |
| Table 9.7.2.1.2     | Negative Binomial Regression Analysis of Tonic Seizure Count During Baseline and Treatment Periods                                   | ITT Analysis Set    |
| Table 9.7.2.2       | Negative Binomial Regression Analysis of Tonic Seizure Count During Baseline and Maintenance Periods                                 | ITT Analysis Set    |
| Table 9.7.2.3       | Summary and Analysis of Tonic Seizure Treatment Responders and Tonic Seizure Freedom During the Treatment Period                     | ITT Analysis Set    |
| Table 9.7.2.4       | Summary and Analysis of Tonic Seizure Treatment Responders and Tonic Seizure Freedom During the Maintenance Period                   | ITT Analysis Set    |
| Table 9.7.3.1.1     | Summary of Atonic Seizure Frequency                                                                                                  | ITT Analysis Set    |
| Table 9.7.3.1.2     | Negative Binomial Regression Analysis of Atonic Seizure Count During Baseline and Treatment Periods                                  | ITT Analysis Set    |
| Table 9.7.3.2       | Negative Binomial Regression Analysis of Atonic Seizure Count During Baseline and Maintenance Periods                                | ITT Analysis Set    |
| Table 9.7.3.3       | Summary and Analysis of Atonic Seizure Treatment Responders and Atonic Seizure Freedom During the Treatment Period                   | ITT Analysis Set    |
| Table 9.7.3.4       | Summary and Analysis of Atonic Seizure Treatment Responders and Atonic Seizure Freedom During the Maintenance Period                 | ITT Analysis Set    |
| Table 9.7.4.1.1     | Summary of Clonic Seizure Frequency                                                                                                  | ITT Analysis Set    |
| Table 9.7.4.1.2     | Negative Binomial Regression Analysis of Clonic Seizure Count During Baseline and Treatment Periods                                  | ITT Analysis Set    |
| Table 9.7.4.2       | Negative Binomial Regression Analysis of Clonic Seizure Count During Baseline and Maintenance Periods                                | ITT Analysis Set    |
| Table 9.7.4.3       | Summary and Analysis of Clonic Seizure Treatment Responders and Clonic Seizure Freedom During the Treatment Period                   | ITT Analysis Set    |
| Table 9.7.4.4       | Summary and Analysis of Clonic Seizure Treatment Responders and Clonic Seizure Freedom During the Maintenance Period                 | ITT Analysis Set    |
| Table 9.7.5.1.1     | Summary of Myoclonic Seizure Frequency                                                                                               | ITT Analysis Set    |
| Table 9.7.5.1.2     | Negative Binomial Regression Analysis of Myoclonic Seizure Count During Baseline and Treatment Periods                               | ITT Analysis Set    |
| Table 9.7.5.2       | Summary and Analysis of Myoclonic Seizure Treatment Responders and Myoclonic Seizure Freedom During the Treatment Period             | ITT Analysis Set    |
| Table 9.7.6.1.1     | Summary of Countable Partial Seizure Frequency                                                                                       | ITT Analysis Set    |

| <b>Table Number</b> | <b>Title</b>                                                                                                                             | <b>Analysis Set</b> |
|---------------------|------------------------------------------------------------------------------------------------------------------------------------------|---------------------|
| Table 9.7.6.1.2     | Negative Binomial Regression Analysis of Countable Partial Seizure Count During Baseline and Treatment Periods                           | ITT Analysis Set    |
| Table 9.7.6.2       | Summary and Analysis of Countable Partial Seizure Treatment Responders and Countable Partial Seizure Freedom During the Treatment Period | ITT Analysis Set    |
| Table 9.7.7.1.1     | Summary of Other Partial Seizure Frequency                                                                                               | ITT Analysis Set    |
| Table 9.7.7.1.2     | Negative Binomial Regression Analysis of Other Partial Seizure Count During Baseline and Treatment Periods                               | ITT Analysis Set    |
| Table 9.7.7.2       | Summary and Analysis of Other Partial Seizure Treatment Responders and Other Partial Seizure Freedom During the Treatment Period         | ITT Analysis Set    |
| Table 9.7.8.1.1     | Summary of Absence Seizure Frequency                                                                                                     | ITT Analysis Set    |
| Table 9.7.8.1.2     | Negative Binomial Regression Analysis of Absence Seizure Count During Baseline and Treatment Periods                                     | ITT Analysis Set    |
| Table 9.7.8.2       | Summary and Analysis of Absence Seizure Treatment Responders and Absence Seizure Freedom During the Treatment Period                     | ITT Analysis Set    |
| Table 9.8           | Summary of Occurrences of Seizure Types Not Experienced During the Baseline Period                                                       | ITT Analysis Set    |
| Table 9.9.1         | Summary of Caregiver Global Impression of Change in Seizure Duration                                                                     | ITT Analysis Set    |
| Table 9.9.2         | Analysis of Caregiver Global Impression of Change in Seizure Duration                                                                    | ITT Analysis Set    |
| Table 9.10          | Summary of Inpatient Hospitalizations due to Epilepsy                                                                                    | ITT Analysis Set    |
| Table 9.11.1        | Summary of Sleep Disruption 0-10 Numerical Rating Scale Score                                                                            | ITT Analysis Set    |
| Table 9.11.2        | Analysis of Change from Baseline in the Sleep Disruption 0-10 Numerical Rating Scale Score                                               | ITT Analysis Set    |
| Table 9.12.1        | Summary of Epworth Daytime Sleepiness Scale Score                                                                                        | ITT Analysis Set    |
| Table 9.12.2        | Analysis of Change from Baseline in the Epworth Daytime Sleepiness Scale Score                                                           | ITT Analysis Set    |
| Table 9.13.1        | Summary of Quality of Life in Childhood Epilepsy Scores                                                                                  | ITT Analysis Set    |
| Table 9.13.2        | Analysis of Change from Baseline in Quality of Life in Childhood Epilepsy Scores                                                         | ITT Analysis Set    |
| Table 9.14.1.1      | Summary of the Vineland-II Adaptive Behavior Subdomain, Domain and Composite Scores                                                      | ITT Analysis Set    |
| Table 9.14.1.2      | Summary of the Vineland-II Adaptive Behavior Subdomain, Domain and Composite Adaptive Levels                                             | ITT Analysis Set    |
| Table 9.14.1.3      | Analysis of Change from Baseline in the Vineland-II Adaptive Behavior Domain and Composite Scores                                        | ITT Analysis Set    |
| Table 9.14.1.4      | Analysis of the Vineland-II Adaptive Behavior Domain and Composite Adaptive Levels                                                       | ITT Analysis Set    |
| Table 9.14.2.1      | Summary of the Vineland-II Maladaptive Behavior Subdomain and Index Scores                                                               | ITT Analysis Set    |
| Table 9.14.2.2      | Summary of the Vineland-II Maladaptive Behavior Subdomain and Index Adaptive Levels                                                      | ITT Analysis Set    |
| Table 9.14.2.3      | Analysis of Change from Baseline in the Vineland-II Maladaptive Behavior Index Score                                                     | ITT Analysis Set    |
| Table 9.14.2.4      | Analysis of the Vineland-II Maladaptive Behavior Index Adaptive Level                                                                    | ITT Analysis Set    |
| Table 9.15.1        | Summary of Cognitive Assessment Battery Patient Measures                                                                                 | ITT Analysis Set    |
| Table 9.15.2.1      | Summary of Cognitive Assessment Battery Parent Measures – Executive (Behavior Rating Inventory of Executive Function)                    | ITT Analysis Set    |



| <b>Table Number</b> | <b>Title</b>                                                                                                                                 | <b>Analysis Set</b> |
|---------------------|----------------------------------------------------------------------------------------------------------------------------------------------|---------------------|
| Table 9.15.2.2      | Summary of Cognitive Assessment Battery Parent Measures – Attention (ADHD Checklist)                                                         | ITT Analysis Set    |
| Table 9.15.2.3      | Summary of Cognitive Assessment Battery Parent Measures – Mood/Anxiety (BASC-2)                                                              | ITT Analysis Set    |
| Table 9.15.2.4      | Summary of Cognitive Assessment Battery Parent Measures – Behavior Report Form                                                               | ITT Analysis Set    |
| Table 9.16.1        | Analysis of Time to Baseline Convulsive Seizure Frequency from the Start of the Treatment Period (Day 1)                                     | ITT Analysis Set    |
| Table 9.16.2        | Analysis of Time to Baseline Convulsive Seizure Frequency from the Start of the Maintenance Period (Day 15)                                  | ITT Analysis Set    |
| Table 9.17.1        | Analysis of Change from Baseline in Convulsive Seizure Free Days Per 28 Days During the Treatment Period                                     | ITT Analysis Set    |
| Table 9.17.2        | Analysis of Change from Baseline in Convulsive Seizure Free Days Per 28 Days During the Maintenance Period                                   | ITT Analysis Set    |
| Table 9.18.1        | Negative Binomial Regression Effect Modification Analysis of Convulsive Seizure Count during Baseline and Treatment Periods                  | ITT Analysis Set    |
| Table 9.18.2        | Logistic Regression Effect Modification Analysis of Convulsive Seizure Responders ( $\geq 50\%$ Reduction) During the Treatment Period       | ITT Analysis Set    |
| Table 10.1          | Summary of Exposure                                                                                                                          | Safety Analysis Set |
| Table 10.2          | Summary of Expected Daily Volumes of IMP Taken Post-Titration                                                                                | Safety Analysis Set |
| Table 11.1          | Overall Summary of Treatment Emergent Adverse Events                                                                                         | Safety Analysis Set |
| Table 11.2          | Summary of Treatment Emergent Adverse Events                                                                                                 | Safety Analysis Set |
| Table 11.3          | Summary of Treatment-Related Treatment Emergent Adverse Events                                                                               | Safety Analysis Set |
| Table 11.4          | Summary of Treatment Emergent Adverse Events by Maximal Severity                                                                             | Safety Analysis Set |
| Table 11.5          | Summary of Treatment Emergent Adverse Events by Sex                                                                                          | Safety Analysis Set |
| Table 11.6          | Summary of TEAEs by Time of First Onset of AE                                                                                                | Safety Analysis Set |
| Table 11.7          | Summary of TEAEs by Time to AE Resolution                                                                                                    | Safety Analysis Set |
| Table 11.8          | Summary of TEAEs Reported in $\geq 2\%$ of Patients in the GWP42003-P Treatment Groups                                                       | Safety Analysis Set |
| Table 11.9          | Summary of Non-Serious Treatment Emergent Adverse Events                                                                                     | Safety Analysis Set |
| Table 11.10         | List of Patients Experiencing Treatment Emergent Adverse Events by System Organ Class and Preferred term                                     | Safety Analysis Set |
| Table 11.11         | Summary of Pre-Treatment Adverse Events                                                                                                      | Safety Analysis Set |
| Table 11.12         | Summary of Treatment Emergent Adverse Events by Event                                                                                        | Safety Analysis Set |
| Table 11.13         | Summary of Treatment-Related Treatment Emergent Adverse Events by Event                                                                      | Safety Analysis Set |
| Table 11.14         | Summary of Non-Serious Treatment Emergent Adverse Events by Event                                                                            | Safety Analysis Set |
| Table 12.1          | Summary of Serious Treatment Emergent Adverse Events                                                                                         | Safety Analysis Set |
| Table 12.2          | Summary of Treatment-Related Serious Treatment Emergent Adverse Events                                                                       | Safety Analysis Set |
| Table 12.3          | Summary of Treatment Emergent Adverse Events Leading to Permanent Discontinuation of IMP                                                     | Safety Analysis Set |
| Table 12.4          | Summary of Treatment-Related Treatment Emergent Adverse Events Leading to Permanent Discontinuation of IMP                                   | Safety Analysis Set |
| Table 12.5          | Summary of Treatment Emergent Adverse Events Leading to IMP Dose Reduction Excluding Permanent Discontinuation and by Resolution and Overall | Safety Analysis Set |

| <b>Table Number</b> | <b>Title</b>                                                                                                                                                             | <b>Analysis Set</b> |
|---------------------|--------------------------------------------------------------------------------------------------------------------------------------------------------------------------|---------------------|
| Table 12.6          | Summary of Treatment-Related Treatment Emergent Adverse Events Leading to IMP Dose Reduction Excluding Permanent Discontinuation and by Resolution and Overall           | Safety Analysis Set |
| Table 12.7          | Summary of Treatment Emergent Adverse Events Leading to Temporary IMP Dose Reduction by Resolution and Overall                                                           | Safety Analysis Set |
| Table 12.8          | Summary of Treatment-Related Treatment Emergent Adverse Events Leading to Temporary IMP Dose Reduction by Resolution and Overall                                         | Safety Analysis Set |
| Table 12.9          | Summary of Treatment Emergent Adverse Events Leading to Permanent IMP Dose Reduction Excluding Permanent Discontinuation and by Resolution and Overall                   | Safety Analysis Set |
| Table 12.10         | Summary of Treatment-Related Treatment Emergent Adverse Events Leading to Permanent IMP Dose Reduction Excluding Permanent Discontinuation and by Resolution and Overall | Safety Analysis Set |
| Table 12.11         | Summary of Fatal Treatment Emergent Adverse Events                                                                                                                       | Safety Analysis Set |
| Table 12.12         | Summary of Serious Treatment Emergent Adverse Events by Event                                                                                                            | Safety Analysis Set |
| Table 12.13         | Summary of Treatment-Related Serious Treatment Emergent Adverse Events by Event                                                                                          | Safety Analysis Set |
| Table 13.1.1        | Summary of Laboratory Safety Parameters – Hematology                                                                                                                     | Safety Analysis Set |
| Table 13.1.2        | Summary of Laboratory Safety Parameters – Biochemistry                                                                                                                   | Safety Analysis Set |
| Table 13.2.1        | Shift Table for Hematology Laboratory Parameters – Based on Reference Ranges                                                                                             | Safety Analysis Set |
| Table 13.2.2        | Shift Table for Biochemistry Laboratory Parameters – Based on Reference Ranges                                                                                           | Safety Analysis Set |
| Table 13.3.1        | Shift Table for Hematology Laboratory Parameters – Based on Toxicity Limits                                                                                              | Safety Analysis Set |
| Table 13.3.2        | Shift Table for Biochemistry Laboratory Parameters – Based on Toxicity Limits                                                                                            | Safety Analysis Set |
| Table 13.3.3        | Shift Table for eGFR – Based on Derived Grades                                                                                                                           | Safety Analysis Set |
| Table 13.4          | Summary of Liver Parameter Flags                                                                                                                                         | Safety Analysis Set |
| Table 13.5          | Incidence of Laboratory Abnormalities                                                                                                                                    | Safety Analysis Set |
| Table 13.6          | Summary of Pregnancy Test and Urine THC Screen Results                                                                                                                   | Safety Analysis Set |
| Table 14.1.1        | Summary of Vital Signs                                                                                                                                                   | Safety Analysis Set |
| Table 14.1.2        | Incidence of Clinically Significant Changes from Baseline for Vital Signs                                                                                                | Safety Analysis Set |
| Table 14.1.3        | Incidence of Defined Flagged Vital Signs                                                                                                                                 | Safety Analysis Set |
| Table 14.1.4        | Incidence of Vital Signs Abnormalities                                                                                                                                   | Safety Analysis Set |
| Table 14.2.1        | Summary of ECG Parameters                                                                                                                                                | Safety Analysis Set |
| Table 14.2.2        | Incidence of Defined Flagged ECG Parameter Values                                                                                                                        | Safety Analysis Set |
| Table 14.2.3        | Incidence of ECG Abnormalities                                                                                                                                           | Safety Analysis Set |
| Table 14.3.1        | Summary of Children’s Columbia-Suicide Severity Rating Scale                                                                                                             | Safety Analysis Set |
| Table 14.3.2        | Summary of Children’s Columbia-Suicide Severity Rating Scale by Type                                                                                                     | Safety Analysis Set |
| Table 14.4          | Incidence of Physical Examination Abnormalities                                                                                                                          | Safety Analysis Set |
| Table 14.5          | Summary of Tanner Stages                                                                                                                                                 | Safety Analysis Set |
| Table 14.6          | Summary of Menstruation Details                                                                                                                                          | Safety Analysis Set |
| Table 14.7          | Summary of Cannabis Withdrawal Scale (18 Years)                                                                                                                          | Safety Analysis Set |
| Table 14.8          | Summary of Pediatric Cannabinoid Withdrawal Scale (4–17 Years)                                                                                                           | Safety Analysis Set |
| Table 14.9          | Summary of Plasma Concentrations of Concomitant Antiepileptic Drugs                                                                                                      | Safety Analysis Set |
| Table 14.10         | Summary of Caregiver Impression of IMP Palatability                                                                                                                      | Safety Analysis Set |

| <b>Table Number</b> | <b>Title</b>                                        | <b>Analysis Set</b> |
|---------------------|-----------------------------------------------------|---------------------|
| Table 14.11         | Summary of Study Medication Use and Behavior Survey | Safety Analysis Set |
| Table 14.12.1       | Summary of Supplemental Drug Accountability Form    | Safety Analysis Set |
| Table 14.12.2       | Summary of Supplemental Adverse Event Form          | Safety Analysis Set |
| Table 14.12.3       | Summary of Site Classification Form                 | Safety Analysis Set |

4982

4983 **Table 14 List of Listings**

| <b>Listing Number</b> | <b>Title</b>                                                                 | <b>Analysis Set</b>         |
|-----------------------|------------------------------------------------------------------------------|-----------------------------|
| Listing 1.1           | Screen Failures                                                              | All Screen Failure Patients |
| Listing 1.2.1         | Patient Disposition – End of Treatment                                       | Safety Analysis Set         |
| Listing 1.2.2         | Patient Disposition – End of Taper                                           | Safety Analysis Set         |
| Listing 1.3           | Inclusion/Exclusion Criteria Not Met                                         | Safety Analysis Set         |
| Listing 1.4           | Visit Dates                                                                  | Safety Analysis Set         |
| Listing 2.1.1         | Important Protocol Deviations                                                | All Randomized Patients     |
| Listing 2.1.2         | All Protocol Deviations                                                      | All Randomized Patients     |
| Listing 2.2           | Analysis Sets                                                                | All Randomized Patients     |
| Listing 3.1           | Demography                                                                   | Safety Analysis Set         |
| Listing 3.2           | Baseline Characteristics                                                     | Safety Analysis Set         |
| Listing 4.1.1         | Dravet Syndrome History – Part 1                                             | Safety Analysis Set         |
| Listing 4.1.2         | Dravet Syndrome History – Part 2                                             | Safety Analysis Set         |
| Listing 4.2.1         | History of Seizures No Longer Occurring                                      | Safety Analysis Set         |
| Listing 4.2.2         | History of Current Seizures                                                  | Safety Analysis Set         |
| Listing 4.3.1         | Electroencephalography History – Part 1                                      | Safety Analysis Set         |
| Listing 4.3.2         | Electroencephalography History – Part 2                                      | Safety Analysis Set         |
| Listing 4.4           | Neuroimaging History                                                         | Safety Analysis Set         |
| Listing 5             | Significant Non-Epilepsy Medical or Surgical History                         | Safety Analysis Set         |
| Listing 6.1           | History of Antiepileptic Medications                                         | Safety Analysis Set         |
| Listing 6.2           | Prior and Concomitant Antiepileptic Therapies                                | Safety Analysis Set         |
| Listing 6.3           | Prior and Concomitant Antiepileptic Medications                              | Safety Analysis Set         |
| Listing 6.4           | Prior and Concomitant Rescue Medications                                     | Safety Analysis Set         |
| Listing 6.5           | Other Prior and Concomitant Medications                                      | Safety Analysis Set         |
| Listing 7             | IVRS Compliance                                                              | Safety Analysis Set         |
| Listing 8.1.1         | IVRS Diary Data – Part 1                                                     | Safety Analysis Set         |
| Listing 8.1.2         | IVRS Diary Data – Part 2                                                     | Safety Analysis Set         |
| Listing 8.2.1         | Derived Convulsive, Non-Convulsive and Total Seizure Data                    | Safety Analysis Set         |
| Listing 8.2.2         | Derived Tonic-Clonic, Tonic, Atonic and Clonic Seizure Data                  | Safety Analysis Set         |
| Listing 8.2.3         | Derived Myoclonic, Countable Partial, Other Partial and Absence Seizure Data | Safety Analysis Set         |
| Listing 8.2.4         | Derived Status Epilepticus Data                                              | Safety Analysis Set         |
| Listing 9.1           | Caregiver Global Impression of Change in Seizure Duration                    | Safety Analysis Set         |
| Listing 9.2           | Inpatient Hospitalizations due to Epilepsy                                   | Safety Analysis Set         |
| Listing 9.3           | Sleep Disruption 0-10 Numerical Rating Scale                                 | Safety Analysis Set         |
| Listing 9.4           | Epworth Daytime Sleepiness Scale                                             | Safety Analysis Set         |
| Listing 9.5.1         | Quality of Life in Childhood Epilepsy – Physical Activities                  | Safety Analysis Set         |
| Listing 9.5.2         | Quality of Life in Childhood Epilepsy – Social Activities                    | Safety Analysis Set         |
| Listing 9.5.3         | Quality of Life in Childhood Epilepsy – Cognition                            | Safety Analysis Set         |
| Listing 9.5.4         | Quality of Life in Childhood Epilepsy – Emotional Well-Being                 | Safety Analysis Set         |
| Listing 9.5.5         | Quality of Life in Childhood Epilepsy – Behavior                             | Safety Analysis Set         |
| Listing 9.5.6         | Quality of Life in Childhood Epilepsy – General Health and Quality of Life   | Safety Analysis Set         |
| Listing 9.5.7         | Quality of Life in Childhood Epilepsy – Derived Scores                       | Safety Analysis Set         |
| Listing 9.6.1         | Vineland-II Adaptive Behavior – Derived Data                                 | Safety Analysis Set         |
| Listing 9.6.2         | Vineland-II Maladaptive Behavior – Derived Data                              | Safety Analysis Set         |
| Listing 9.7           | Caregiver Global Impression of Change                                        | Safety Analysis Set         |
| Listing 9.8.1.1       | Cognitive Assessment Battery Patient Measures – Intelligence                 | Safety Analysis Set         |
| Listing 9.8.1.2       | Cognitive Assessment Battery Patient Measures – Attention/Executive          | Safety Analysis Set         |

| <b>Listing Number</b> | <b>Title</b>                                                                                               | <b>Analysis Set</b> |
|-----------------------|------------------------------------------------------------------------------------------------------------|---------------------|
| Listing 9.8.1.3       | Cognitive Assessment Battery Patient Measures – Language, Visual-Spatial and Fine Motor Speed              | Safety Analysis Set |
| Listing 9.8.2.1       | Cognitive Assessment Battery Parent Measures – Executive (Behavior Rating Inventory of Executive Function) | Safety Analysis Set |
| Listing 9.8.2.2.1     | Cognitive Assessment Battery Parent Measures – Attention (ADHD Checklist) – Part 1                         | Safety Analysis Set |
| Listing 9.8.2.2.2     | Cognitive Assessment Battery Parent Measures – Attention (ADHD Checklist) – Part 2                         | Safety Analysis Set |
| Listing 9.8.2.3       | Cognitive Assessment Battery Parent Measures – Mood/Anxiety (BASC-2)                                       | Safety Analysis Set |
| Listing 9.8.2.4       | Cognitive Assessment Battery Parent Measures – Behavior Report Form                                        | Safety Analysis Set |
| Listing 9.9           | Time to Baseline Convulsive Seizure Frequency                                                              | Safety Analysis Set |
| Listing 9.10          | Convulsive Seizure Free Days Per 28 Days                                                                   | Safety Analysis Set |
| Listing 10.1          | Exposure and Compliance                                                                                    | Safety Analysis Set |
| Listing 10.2          | Exposure by Time                                                                                           | Safety Analysis Set |
| Listing 10.3          | IMP Accountability                                                                                         | Safety Analysis Set |
| Listing 11.1.1        | Treatment Emergent Adverse Events                                                                          | Safety Analysis Set |
| Listing 11.1.2        | Treatment Emergent Adverse Events of Special Interest                                                      | Safety Analysis Set |
| Listing 11.2          | Pre-Treatment Adverse Events                                                                               | Safety Analysis Set |
| Listing 12            | Serious Adverse Events                                                                                     | Safety Analysis Set |
| Listing 13.1.1        | Laboratory Parameters                                                                                      | Safety Analysis Set |
| Listing 13.1.2.1      | Abnormal Laboratory Parameters by Patient                                                                  | Safety Analysis Set |
| Listing 13.1.2.2      | Abnormal Laboratory Parameters by Parameter                                                                | Safety Analysis Set |
| Listing 13.1.3        | Laboratory Comments                                                                                        | Safety Analysis Set |
| Listing 13.1.4        | Laboratory Liver Parameters                                                                                | Safety Analysis Set |
| Listing 13.2          | Laboratory Reference Ranges and Toxicity Limits                                                            |                     |
| Listing 14.1.1        | Vital Signs – Blood Pressures                                                                              | Safety Analysis Set |
| Listing 14.1.2        | Vital Signs – Pulse Rate, Respiratory Rate and Temperature                                                 | Safety Analysis Set |
| Listing 14.1.3        | Vital Signs – Height, Weight and BMI                                                                       | Safety Analysis Set |
| Listing 14.2          | Potentially Clinically Significant Changes from Baseline for Vital Signs                                   | Safety Analysis Set |
| Listing 14.3.1        | ECG Data – Part 1                                                                                          | Safety Analysis Set |
| Listing 14.3.2        | ECG Data – Part 2                                                                                          | Safety Analysis Set |
| Listing 14.4.1        | Columbia-Suicide Severity Rating Scale (C-SSRS) – Suicidal Ideation and Intensity                          | Safety Analysis Set |
| Listing 14.4.2        | Columbia-Suicide Severity Rating Scale (C-SSRS) – Suicidal Behavior                                        | Safety Analysis Set |
| Listing 14.4.3        | Columbia-Suicide Severity Rating Scale (C-SSRS) – Actual Attempts                                          | Safety Analysis Set |
| Listing 14.5          | Physical Examination                                                                                       | Safety Analysis Set |
| Listing 14.6          | Tanner Stages                                                                                              | Safety Analysis Set |
| Listing 14.7          | Menstruation Details                                                                                       | Safety Analysis Set |
| Listing 14.8          | Cannabis Withdrawal Scale (18 Years)                                                                       | Safety Analysis Set |
| Listing 14.9          | Pediatric Cannabinoid Withdrawal Scale (4–17 Years)                                                        | Safety Analysis Set |
| Listing 14.10         | Plasma Concentrations of Concomitant Antiepileptic Drugs                                                   | Safety Analysis Set |
| Listing 14.11         | Caregiver Impression of IMP Palatability                                                                   | Safety Analysis Set |
| Listing 14.12.1       | Study Medication Use and Behavior Survey – Part 1                                                          | Safety Analysis Set |
| Listing 14.12.2       | Study Medication Use and Behavior Survey – Part 2                                                          | Safety Analysis Set |
| Listing 14.13.1       | Supplemental Drug Accountability Form                                                                      | Safety Analysis Set |
| Listing 14.13.2       | Supplemental Adverse Events Form                                                                           | Safety Analysis Set |
| Listing 14.13.3       | Site Classification Form                                                                                   | Safety Analysis Set |
| Listing 14.14         | Meal Times                                                                                                 | Safety Analysis Set |
| Listing 15            | Investigators' General Comments                                                                            | Safety Analysis Set |

4984  
4985**Table 15 List of Figures**

| <b>Figure Number</b> | <b>Title</b>                                                                                                | <b>Analysis Set</b> |
|----------------------|-------------------------------------------------------------------------------------------------------------|---------------------|
| Figure 9.1.1.1       | Cumulative Distribution Function for Convulsive Seizures During the Treatment Period                        | ITT Analysis Set    |
| Figure 9.1.1.2       | Cumulative Distribution Function for Convulsive Seizures During the Treatment Period                        | PP Analysis Set     |
| Figure 9.1.2         | Cumulative Distribution Function for Convulsive Seizures During the Maintenance Period                      | ITT Analysis Set    |
| Figure 9.1.3         | Cumulative Distribution Function for Convulsive Seizures During Weeks 1 to 4 of the Maintenance Period      | ITT Analysis Set    |
| Figure 9.1.4         | Cumulative Distribution Function for Convulsive Seizures During Weeks 5 to 8 of the Maintenance Period      | ITT Analysis Set    |
| Figure 9.1.5         | Cumulative Distribution Function for Convulsive Seizures During Weeks 9 to 12 of the Maintenance Period     | ITT Analysis Set    |
| Figure 9.2.1         | Cumulative Distribution Function for Total Seizures During the Treatment Period                             | ITT Analysis Set    |
| Figure 9.2.2         | Cumulative Distribution Function for Total Seizures During the Maintenance Period                           | ITT Analysis Set    |
| Figure 9.2.3         | Cumulative Distribution Function for Total Seizures During Weeks 1 to 4 of the Maintenance Period           | ITT Analysis Set    |
| Figure 9.2.4         | Cumulative Distribution Function for Total Seizures During Weeks 5 to 8 of the Maintenance Period           | ITT Analysis Set    |
| Figure 9.2.5         | Cumulative Distribution Function for Total Seizures During Weeks 9 to 12 of the Maintenance Period          | ITT Analysis Set    |
| Figure 9.3.1         | Cumulative Distribution Function for Non-Convulsive Seizures During the Treatment Period                    | ITT Analysis Set    |
| Figure 9.3.2         | Cumulative Distribution Function for Non-Convulsive Seizures During the Maintenance Period                  | ITT Analysis Set    |
| Figure 9.3.3         | Cumulative Distribution Function for Non-Convulsive Seizures During Weeks 1 to 4 of the Maintenance Period  | ITT Analysis Set    |
| Figure 9.3.4         | Cumulative Distribution Function for Non-Convulsive Seizures During Weeks 5 to 8 of the Maintenance Period  | ITT Analysis Set    |
| Figure 9.3.5         | Cumulative Distribution Function for Non-Convulsive Seizures During Weeks 9 to 12 of the Maintenance Period | ITT Analysis Set    |
| Figure 9.4.1         | Cumulative Distribution Function for Tonic-Clonic Seizures During the Treatment Period                      | ITT Analysis Set    |
| Figure 9.4.2         | Cumulative Distribution Function for Tonic-Clonic Seizures During the Maintenance Period                    | ITT Analysis Set    |
| Figure 9.4.3         | Cumulative Distribution Function for Tonic-Clonic Seizures During Weeks 1 to 4 of the Maintenance Period    | ITT Analysis Set    |
| Figure 9.4.4         | Cumulative Distribution Function for Tonic-Clonic Seizures During Weeks 5 to 8 of the Maintenance Period    | ITT Analysis Set    |
| Figure 9.4.5         | Cumulative Distribution Function for Tonic-Clonic Seizures During Weeks 9 to 12 of the Maintenance Period   | ITT Analysis Set    |
| Figure 9.5.1         | Cumulative Distribution Function for Tonic Seizures During the Treatment Period                             | ITT Analysis Set    |
| Figure 9.5.2         | Cumulative Distribution Function for Tonic Seizures During the Maintenance Period                           | ITT Analysis Set    |
| Figure 9.5.3         | Cumulative Distribution Function for Tonic Seizures During Weeks 1 to 4 of the Maintenance Period           | ITT Analysis Set    |
| Figure 9.5.4         | Cumulative Distribution Function for Tonic Seizures During Weeks 5 to 8 of the Maintenance Period           | ITT Analysis Set    |
| Figure 9.5.5         | Cumulative Distribution Function for Tonic Seizures During Weeks 9 to 12 of the Maintenance Period          | ITT Analysis Set    |
| Figure 9.6.1         | Cumulative Distribution Function for Atonic Seizures During the Treatment Period                            | ITT Analysis Set    |

|                 |                                                                                                                      |                     |
|-----------------|----------------------------------------------------------------------------------------------------------------------|---------------------|
| Figure 9.6.2    | Cumulative Distribution Function for Atonic Seizures During the Maintenance Period                                   | ITT Analysis Set    |
| Figure 9.6.3    | Cumulative Distribution Function for Atonic Seizures During Weeks 1 to 4 of the Maintenance Period                   | ITT Analysis Set    |
| Figure 9.6.4    | Cumulative Distribution Function for Atonic Seizures During Weeks 5 to 8 of the Maintenance Period                   | ITT Analysis Set    |
| Figure 9.6.5    | Cumulative Distribution Function for Atonic Seizures During Weeks 9 to 12 of the Maintenance Period                  | ITT Analysis Set    |
| Figure 9.7.1    | Cumulative Distribution Function for Clonic Seizures During the Treatment Period                                     | ITT Analysis Set    |
| Figure 9.7.2    | Cumulative Distribution Function for Clonic Seizures During the Maintenance Period                                   | ITT Analysis Set    |
| Figure 9.7.3    | Cumulative Distribution Function for Clonic Seizures During Weeks 1 to 4 of the Maintenance Period                   | ITT Analysis Set    |
| Figure 9.7.4    | Cumulative Distribution Function for Clonic Seizures During Weeks 5 to 8 of the Maintenance Period                   | ITT Analysis Set    |
| Figure 9.7.5    | Cumulative Distribution Function for Clonic Seizures During Weeks 9 to 12 of the Maintenance Period                  | ITT Analysis Set    |
| Figure 9.8      | Cumulative Distribution Function for Myoclonic Seizures During the Treatment Period                                  | ITT Analysis Set    |
| Figure 9.9      | Cumulative Distribution Function for Countable Partial Seizures During the Treatment Period                          | ITT Analysis Set    |
| Figure 9.10     | Cumulative Distribution Function for Other Partial Seizures During the Treatment Period                              | ITT Analysis Set    |
| Figure 9.11     | Cumulative Distribution Function for Absence Seizures During the Treatment Period                                    | ITT Analysis Set    |
| Figure 9.12.1   | Kaplan-Meier Plot of Time to Baseline Convulsive Seizure Frequency from the Start of the Treatment Period (Day 1)    | ITT Analysis Set    |
| Figure 9.12.2   | Kaplan-Meier Plot of Time to Baseline Convulsive Seizure Frequency from the Start of the Maintenance Period (Day 15) | ITT Analysis Set    |
| Figure 14.1     | Box Plot of Change from Baseline to the End of Treatment Visit in IGF-1 Levels by Tanner Stages at Baseline          | Safety Analysis Set |
| Figure 14.2     | Scatter Plot of Change from Baseline to the End of Treatment Visit in IGF-1 Levels Against Weight at Baseline        | Safety Analysis Set |
| Figure 14.3     | Scatter Plot of Change from Baseline to the End of Treatment Visit in IGF-1 Levels Against Height at Baseline        | Safety Analysis Set |
| Figure 14.4.1.X | Scatter Plot of Shift from Baseline to Maximum Post First Dose Laboratory Result - Hematology                        | Safety Analysis Set |
| Figure 14.4.2.X | Scatter Plot of Shift from Baseline to Maximum Post First Dose Laboratory Result - Biochemistry                      | Safety Analysis Set |
