# Supplementary material for: Dose-Ranging Effect of Adjunctive Oral Cannabidiol vs Placebo on Convulsive Seizure Frequency in Dravet Syndrome: A Randomized Clinical Trial
Source: PubMed Central journal article supplement — JAMA Neurol. 2020 Mar 2;77(5):1–10. doi: 10.1001/jamaneurol.2020.0073 (PMC7052786; doi:10.1001/jamaneurol.2020.0073), 2020-03-02
Supplement: jamaneurol-77-613-s003.pdf [file jamaneurol-77-613-s003.pdf]

## Data Sharing Statement

Miller. Dose-Ranging Effect of Adjunctive Oral Cannabidiol vs Placebo on Convulsive Seizure Frequency in Dravet Syndrome. *JAMA Neurol.* Published March 02, 2020. 10.1001/jamaneurol.2020.0073

### Data

**Data available:** No
